# Supplementary material for: Identification of Some Glutamic Acid Derivatives with Biological Potential by Computational Methods
Source: MDPI journal article supplement (doi:10.3390/molecules28104123), 2023-05-16
Supplement: s1 [file s1]

## IDENTIFICATION OF SOME GLUTAMIC ACID DERIVATIVES WITH BIOLOGICAL POTENTIAL BY COMPUTATIONAL METHODS

OCTAVIA-LAURA MOLDOVAN<sup>1,†,\*</sup>, ALEXANDRA SANDULEA<sup>2,†</sup>, IOANA-ANDREEA LUNGU<sup>1</sup>, ȘERBAN ANDREI GÂZ<sup>3</sup> AND AURA RUSU<sup>2</sup>

<sup>1</sup> *Medicine and Pharmacy Doctoral School, George Emil Palade University of Medicine, Pharmacy, Science and Technology of Targu Mures, 540142, Targu Mures, Romania*

*E-mail: [octavia.moldovan@umfst.ro](mailto:octavia.moldovan@umfst.ro), [ioana-andreea.lungu@umfst.ro](mailto:ioana-andreea.lungu@umfst.ro)*

<sup>2</sup> *Pharmaceutical and Therapeutic Chemistry Department, Faculty of Pharmacy, George Emil Palade University of Medicine, Pharmacy, Science and Technology of Targu Mures, 540142, Targu Mures, Romania*

*E-mail: [sandulea.alex@yahoo.com](mailto:sandulea.alex@yahoo.com), [aura.rusu@umfst.ro](mailto:aura.rusu@umfst.ro)*

<sup>3</sup> *Organic Chemistry Department, George Emil Palade University of Medicine, Pharmacy, Science and Technology of Targu Mures, 540142, Targu Mures, Romania*

*E-mail: [andrei.gaz-florea@umfst.ro](mailto:andrei.gaz-florea@umfst.ro)*

<sup>†</sup> *These authors share the first authorship.*

<sup>\*</sup> *Corresponding author email: [octavia.moldovan@umfst.ro](mailto:octavia.moldovan@umfst.ro)*

## SUPPLEMENTARY MATERIALS

**Table S1.** Programs and tested parameters.

| No. | Program name             | Tested parameters                                                                                                                                                                                                                                                                                       | References |
|-----|--------------------------|---------------------------------------------------------------------------------------------------------------------------------------------------------------------------------------------------------------------------------------------------------------------------------------------------------|------------|
| 1   | BIOVIA Draw              | With the help of this application, the chemical structures were created, and the computational descriptors were generated:<br>- IUPAC name<br>-Molecular weight and formula<br>-InChI String and InChI Key<br>-SMILES                                                                                   | [1]        |
| 2   | MarvinSketch             | -Protonation: pKa, microspecies, pI<br>-Partition coefficients: logP, logD, HLB<br>-Electric charge: polarizability<br>-Isomery: tautomers, stereoisomers<br>-Conformation: conformers<br>-Geometry: number of asymmetric atoms, polar surface area<br>-Other: hydrogen donors-acceptors, CNS MPO score | [2]        |
| 3   | AquaSol                  | logS                                                                                                                                                                                                                                                                                                    | [3]        |
| 4   | Chemicalize              | -Lipinski's rule<br>-Solubility class                                                                                                                                                                                                                                                                   | [4]        |
| 5   | Toxtree                  | -Cramer rule, Kroes TTC, Verhaar scheme<br>-Carcinogenesis (genotoxic-non-genotoxic) and mutagenesis<br>- <i>In vitro</i> mutagenesis (Ames test)<br>-Skin irritation<br>-Biodegradability<br>-Metabolism mediated by cytochrome P450<br>-Protein and DNA binding alerts                                | [5]        |
| 6   | OSIRIS Property Explorer | - Toxicity risk: mutagenesis, tumorigenesis, irritating effect, adverse effects on the reproductive system<br>-Drug-likeness<br>-Overall drug-likeness score                                                                                                                                            | [6]        |
| 7   | DruLiTo                  | -Lipinski's rule<br>-BBB rule                                                                                                                                                                                                                                                                           | [7]        |
| 8   | SMARTCyp                 | Metabolism by isoforms 3A4, 2D6 and 2C9                                                                                                                                                                                                                                                                 | [8]        |
| 9   | Molinspiration           | Bioactivity:<br>-GPCR ligand<br>-Ion channel modulator<br>-Kinase inhibitor                                                                                                                                                                                                                             | [9]        |

| No. | Program name           | Tested parameters                                                                                                                                                                                                                                                                                                                                                                                                                                                                                                                                                                                         | References |
|-----|------------------------|-----------------------------------------------------------------------------------------------------------------------------------------------------------------------------------------------------------------------------------------------------------------------------------------------------------------------------------------------------------------------------------------------------------------------------------------------------------------------------------------------------------------------------------------------------------------------------------------------------------|------------|
|     |                        | -Ligand on nuclear receptors<br>-Protease inhibitor<br>-Enzyme inhibitor                                                                                                                                                                                                                                                                                                                                                                                                                                                                                                                                  |            |
| 10  | SwissADME              | -HA, HAA<br>-Csp3 fraction<br>-RB<br>-Acceptor and donor hydrogen bonds<br>-MR<br>-TPSA<br>-iLOGP, XLOGP4, WLOGP, MLOGP, Silicos-IT LogP<br>-Consensus LogP<br>-ESOL LogS<br>-ESOL Solubility (mg/ml and mol/L)<br>-ESOL Class<br>-Ali Log S<br>-Ali Solubility (mg/ml and mol/L)<br>-Ali Class<br>-Silicos-IT Log Sw<br>-Silicos-IT Solubility (mg/ml and mol/L)<br>-Silicos-IT Class<br>-GI Absorption<br>-BBB Permeability<br>-P-gp Substrate<br>-CYP1A2, CYP2C19, CYP2C9 , CYP2D6, CYP3A4 inhibitor<br>-log Kp (permeability)<br>-Lipinski, Ghose, Veber, Egan, Muegge<br>-BD Score, Leadlikeness, SA | [10,11]    |
| 11  | SwissTarget Prediction | Molecular targets and the probability of binding the compound to that target                                                                                                                                                                                                                                                                                                                                                                                                                                                                                                                              | [12]       |
| 12  | SwissDock              | Saving the target receptor structures in PDB format, necessary for molecular docking                                                                                                                                                                                                                                                                                                                                                                                                                                                                                                                      | [13]       |
| 13  | CLC-Pred               | The type of cancerous tissue and cell line for which the compound could have a cytotoxic effect, proved that Pa (probability of „being active”) is higher than Pi (probability of „being inactive”).                                                                                                                                                                                                                                                                                                                                                                                                      | [14]       |
| 14  | GUSAR                  | Acute toxicity in rodents: LD50 values (log10 (mg/kg)) for oral, intravenous, intraperitoneal and subcutaneous administration.                                                                                                                                                                                                                                                                                                                                                                                                                                                                            | [15]       |
| 15  | SOMP                   | No.of the atom most likely to be metabolized by CYP1A2, CYP2C9, CYP2C19, CYP2D6 and CYP3A4, according to the value of the DeltaP parameter                                                                                                                                                                                                                                                                                                                                                                                                                                                                | [16]       |
| 16  | PASSonline             | -Mechanisms of action                                                                                                                                                                                                                                                                                                                                                                                                                                                                                                                                                                                     | [17]       |

| No. | Program name        | Tested parameters                                                                                                                                       | References |
|-----|---------------------|---------------------------------------------------------------------------------------------------------------------------------------------------------|------------|
|     |                     | -Adverse/toxic effects<br>(condition: Pa>Pi)                                                                                                            |            |
| 17  | AutoDock Vina 1.1.2 | Molecular docking (the program was used as an extension within Chimera software)                                                                        | [18]       |
| 18  | UCSF Chimera 1.15   | -Molecular docking<br>-Molecular dynamics simulation                                                                                                    | [19]       |
| 19  | PatchDock Beta 1.3  | The most likely sites of interaction for a given receptor molecule, presented as coordinates. The data obtained were later used in the Chimera program. | [20,21]    |
| 20  | SwissSimilarity     | Compounds that show structural similarity to glutamic acid derivatives, along with the similarity score                                                 | [22]       |

**Table S2.** Chemical structures, ID codes and computational descriptors of glutamic acid derivatives, obtained with BioviaDraw.

| No. | ID code | Structural formula                                                                  | SMILES                           | Molecular weight | Molecular formula                              | IUPAC name                           | InChI String                                                        | InChI Key                    |
|-----|---------|-------------------------------------------------------------------------------------|----------------------------------|------------------|------------------------------------------------|--------------------------------------|---------------------------------------------------------------------|------------------------------|
| 1   | 1Aa1    | 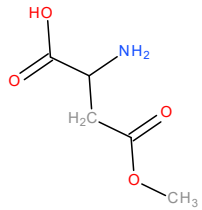   | <chem>COC(=O)CC(N)C(=O)O</chem>  | 147.13           | C <sub>5</sub> H <sub>9</sub> NO <sub>4</sub>  | 2-amino-4-methoxy-4-oxobutanoic acid | InChI=1S/C5H9NO4/c1-10-4(7)2-3(6)5(8)9/h3H,2,6H2,1H3,(H,8,9)        | SBRYFUVVWOMLLP-UHFFFAOYSA-N  |
| 2   | 1Aa2    |    | <chem>COC(=O)C(N)CC(=O)O</chem>  | 147.13           | C <sub>5</sub> H <sub>9</sub> NO <sub>4</sub>  | 3-amino-4-methoxy-4-oxobutanoic acid | InChI=1S/C5H9NO4/c1-10-5(9)3(6)2-4(7)8/h3H,2,6H2,1H3,(H,7,8)        | SWWBMHIMADRNIK-UHFFFAOYSA-N  |
| 3   | 1Aa3    |   | <chem>CCOC(=O)CC(N)C(=O)O</chem> | 161.157          | C <sub>6</sub> H <sub>11</sub> NO <sub>4</sub> | 2-amino-4-ethoxy-4-oxobutanoic acid  | InChI=1S/C6H11NO4/c1-2-11-5(8)3-4(7)6(9)10/h4H,2-3,7H2,1H3,(H,9,10) | KALSWOYBXAH EKF-UHFFFAOYSA-N |
| 4   | 1Aa4    |  | <chem>CCOC(=O)C(N)CC(=O)O</chem> | 161.157          | C <sub>6</sub> H <sub>11</sub> NO <sub>4</sub> | 3-amino-4-ethoxy-4-oxobutanoic acid  | InChI=1S/C6H11NO4/c1-2-11-6(10)4(7)3-5(8)9/h4H,2-3,7H2,1H3,(H,8,9)  | WXFCDLWCQIARFW-UHFFFAOYSA-N  |

| No. | ID code | Structural formula | SMILES                                | Molecular weight | Molecular formula                              | IUPAC name                            | InChI String                                                            | InChI Key                   |
|-----|---------|--------------------|---------------------------------------|------------------|------------------------------------------------|---------------------------------------|-------------------------------------------------------------------------|-----------------------------|
| 5   | 1Aa5    |                    | <chem>COC(=O)CCC(N)C(=O)O</chem>      | 161.157          | C <sub>6</sub> H <sub>11</sub> NO <sub>4</sub> | 2-amino-5-methoxy-5-oxopentanoic acid | InChI=1S/C6H11NO4/c1-11-5(8)3-2-4(7)6(9)10/h4H,2-3,7H2,1H3,(H,9,10)     | ZGEYCCHDTIDZAE-UHFFFAOYSA-N |
| 6   | 1Aa6    |                    | <chem>COC(=O)C(N)CCC(O)C(=O)O</chem>  | 162.157          | C <sub>6</sub> H <sub>11</sub> NO <sub>5</sub> | 4-amino-5-methoxy-5-oxopentanoic acid | InChI=1S/C6H11NO4/c1-11-6(10)4(7)2-3-5(8)9/h4H,2-3,7H2,1H3,(H,8,9)      | SEWIYICDCVPBEW-UHFFFAOYSA-N |
| 7   | 1Aa7    |                    | <chem>CCOC(=O)CCC(N)C(=O)O</chem>     | 175.184          | C <sub>7</sub> H <sub>13</sub> NO <sub>4</sub> | 2-amino-5-ethoxy-5-oxopentanoic acid  | InChI=1S/C7H13NO4/c1-2-12-6(9)4-3-5(8)7(10)11/h5H,2-4,8H2,1H3,(H,10,11) | XMQUEQJCYRFIQS-UHFFFAOYSA-N |
| 8   | 1Aa8    |                    | <chem>CCOC(=O)C(N)CCC(O)C(=O)O</chem> | 175.184          | C <sub>7</sub> H <sub>13</sub> NO <sub>4</sub> | 4-amino-5-ethoxy-5-oxopentanoic acid  | InChI=1S/C7H13NO4/c1-2-12-7(11)5(8)3-4-6(9)10/h5H,2-4,8H2,1H3,(H,9,10)  | SYQNQPHXKWWZFS-UHFFFAOYSA-N |

| No. | ID code | Structural formula                                                                  | SMILES                           | Molecular weight | Molecular formula                                            | IUPAC name                           | InChI String                                                           | InChI Key                   |
|-----|---------|-------------------------------------------------------------------------------------|----------------------------------|------------------|--------------------------------------------------------------|--------------------------------------|------------------------------------------------------------------------|-----------------------------|
| 9   | 1Ba1    | 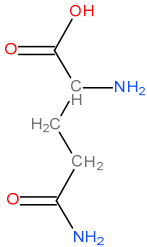   | <chem>NC(CCC(N)=O)C(O)=O</chem>  | 146.146          | C <sub>5</sub> H <sub>10</sub> N <sub>2</sub> O <sub>3</sub> | 2-amino-4-carbamoylbutanoic acid     | InChI=1S/C5H10N2O3/c6-3(5(9)10)1-2-4(7)8/h3H,1-2,6H2,(H2,7,8)(H,9,10)  | ZDXPYRJPNDTMRX-UHFFFAOYSA-N |
| 10  | 1Ba2    |    | <chem>NC(CCC(N)=O)C(N)=O</chem>  | 145.162          | C <sub>5</sub> H <sub>11</sub> N <sub>3</sub> O <sub>2</sub> | 2-aminopentanediamide                | InChI=1S/C5H11N3O2/c6-3(5(8)10)1-2-4(7)9/h3H,1-2,6H2,(H2,7,9)(H2,8,10) | LCGISIDBXHGCDW-UHFFFAOYSA-N |
| 11  | 1Ba3    |   | <chem>NC(CCC(O)=O)C(N)=O</chem>  | 146.146          | C <sub>5</sub> H <sub>10</sub> N <sub>2</sub> O <sub>3</sub> | 4-amino-4-carbamoylbutanoic acid     | InChI=1S/C5H10N2O3/c6-3(5(7)10)1-2-4(8)9/h3H,1-2,6H2,(H2,7,10)(H,8,9)  | AEFLONBTGZFSGQ-UHFFFAOYSA-N |
| 12  | 1Ca1    |  | <chem>NC(CCC(Cl)=O)C(O)=O</chem> | 165.57           | C <sub>5</sub> H <sub>8</sub> ClNO <sub>3</sub>              | 2-amino-5-chloro-5-oxopentanoic acid | InChI=1S/C5H8ClNO3/c6-4(8)2-1-3(7)5(9)10/h3H,1-2,7H2,(H,9,10)          | FTDIKXWDDQYGB-UHFFFAOYSA-N  |

| No. | ID code | Structural formula                                                                  | SMILES                                | Molecular weight | Molecular formula                                             | IUPAC name                                | InChI String                                                               | InChI Key                   |
|-----|---------|-------------------------------------------------------------------------------------|---------------------------------------|------------------|---------------------------------------------------------------|-------------------------------------------|----------------------------------------------------------------------------|-----------------------------|
| 13  | 1Ca2    | 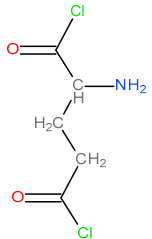   | <chem>NC(CCC(Cl)=O)C(Cl)=O</chem>     | 184.02           | C <sub>5</sub> H <sub>7</sub> Cl <sub>2</sub> NO <sub>2</sub> | 2-aminopentanedioyl dichloride            | InChI=1S/C5H7Cl2NO2/c6-4(9)2-1-3(8)5(7)10/h3H,1-2,8H2                      | BGQUGWDFOLIPAH-UHFFFAOYSA-N |
| 14  | 1Ca3    |    | <chem>NC(CCC(O)=O)C(Cl)=O</chem>      | 165.57           | C <sub>5</sub> H <sub>8</sub> ClNO <sub>3</sub>               | 4-amino-5-chloro-5-oxopentanoic acid      | InChI=1S/C5H8ClNO3/c6-5(10)3(7)1-2-4(8)9/h3H,1-2,7H2,(H,8,9)               | MNCCGMMMOFFNMM-UHFFFAOYSA-N |
| 15  | 1Da1    |   | <chem>CC(=O)OC(=O)C(N)C(=O)O</chem>   | 161.113          | C <sub>5</sub> H <sub>7</sub> NO <sub>5</sub>                 | 3-(acetyloxy)-2-amino-3-oxopropanoic acid | InChI=1S/C5H7NO5/c1-2(7)11-5(10)3(6)4(8)9/h3H,6H2,1H3,(H,8,9)              | MSDXYRKPRIIYT-UHFFFAOYSA-N  |
| 16  | 1Da2    |  | <chem>CC(=O)OC(=O)CCC(N)C(=O)O</chem> | 189.167          | C <sub>7</sub> H <sub>11</sub> NO <sub>5</sub>                | 5-(acetyloxy)-2-amino-5-oxopentanoic acid | InChI=1S/C7H11NO5/c1-4(9)13-6(10)3-2-5(8)7(11)12/h5H,2-3,8H2,1H3,(H,11,12) | FBCSEFYXPQJLFW-UHFFFAOYSA-N |



| No. | ID code | Structural formula                                                                  | SMILES                                | Molecular weight | Molecular formula                              | IUPAC name                                | InChI String                                                                             | InChI Key                    |
|-----|---------|-------------------------------------------------------------------------------------|---------------------------------------|------------------|------------------------------------------------|-------------------------------------------|------------------------------------------------------------------------------------------|------------------------------|
| 17  | 1Da3    | 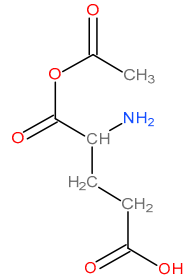   | <chem>CC(=O)OC(=O)C(N)C(=O)O</chem>   | 189.167          | C <sub>7</sub> H <sub>11</sub> NO <sub>5</sub> | 5-(acetyloxy)-4-amino-5-oxopentanoic acid | InChI=1S/C7H11NO5/c1-4(9)13-7(12)5(8)2-3-6(10)11/h5H,2-3,8H2,1H3,(H,10,11)               | PUTYUEPGBGUQNX-UHFFFAOYSA-N  |
| 18  | 1Da4    |    | <chem>NC1CCC(=O)OC1=O</chem>          | 129.115          | C <sub>5</sub> H <sub>7</sub> NO <sub>3</sub>  | 3-aminooxane-2,6-dione                    | InChI=1S/C5H7NO3/c6-3-1-2-4(7)9-5(3)8/h3H,1-2,6H2                                        | RFWFOJDAIRDA PK-UHFFFAOYSA-N |
| 19  | 2Aa1    |   | <chem>CC(=O)NC(CCC(=O)O)C(=O)O</chem> | 189.167          | C <sub>7</sub> H <sub>11</sub> NO <sub>5</sub> | 2-acetamidopentanedioic acid              | InChI=1S/C7H11NO5/c1-4(9)8-5(7(12)13)2-3-6(10)11/h5H,2-3H2,1H3,(H,8,9)(H,10,11)(H,12,13) | RFMMMVDNIPUKGG-UHFFFAOYSA-N  |
| 20  | 2Ba1    |  | <chem>CNC(CCC(=O)O)C(=O)O</chem>      | 161.157          | C <sub>6</sub> H <sub>11</sub> NO <sub>4</sub> | 2-(methylamino)pentanedioic acid          | InChI=1S/C6H11NO4/c1-7-4(6(10)11)2-3-5(8)9/h4,7H,2-3H2,1H3,(H,8,9)(H,10,11)              | MOSFIJXAXDLO ML-UHFFFAOYSA-N |

| No. | ID code | Structural formula | SMILES                                    | Molecular weight | Molecular formula                              | IUPAC name                            | InChI String                                                                           | InChI Key                           |
|-----|---------|--------------------|-------------------------------------------|------------------|------------------------------------------------|---------------------------------------|----------------------------------------------------------------------------------------|-------------------------------------|
| 21  | 2Ba2    |                    | <chem>CN(C)C(CCC(O)=O)C(O)=O</chem>       | 175.184          | C <sub>7</sub> H <sub>13</sub> NO <sub>4</sub> | 2-(dimethylamino)pentanedioic acid    | InChI=1S/C7H13NO4/c1-8(2)5(7(11)12)3-4-6(9)10/h5H,3-4H2,1-2H3,(H,9,10)(H,11,12)        | JCHFXGIXHDRB<br>FU-<br>UHFFFAOYSA-N |
| 22  | 2Ba3    |                    | <chem>C[N+](C)(C)C(CCC(O)=O)C(O)=O</chem> | 190.218          | C <sub>8</sub> H <sub>16</sub> NO <sub>4</sub> | (1,3-dicarboxypropyl)trimethylazanium | InChI=1S/C8H15NO4/c1-9(2,3)6(8(12)13)4-5-7(10)11/h6H,4-5H2,1-3H3,(H-,10,11,12,13)/p+1  | WTIGXLNNRAGP<br>IV-<br>UHFFFAOYSA-O |
| 23  | 2Ba4    |                    | <chem>CCNC(CCC(O)=O)C(O)=O</chem>         | 175.184          | C <sub>7</sub> H <sub>13</sub> NO <sub>4</sub> | 2-(ethylamino)pentanedioic acid       | InChI=1S/C7H13NO4/c1-2-8-5(7(11)12)3-4-6(9)10/h5,8H,2-4H2,1H3,(H,9,10)(H,11,12)        | BIAZEQPYCCAD<br>LD-<br>UHFFFAOYSA-N |
| 24  | 2Ba5    |                    | <chem>CCN(CC)C(CCC(O)=O)C(O)=O</chem>     | 203.238          | C <sub>9</sub> H <sub>17</sub> NO <sub>4</sub> | 2-(diethylamino)pentanedioic acid     | InChI=1S/C9H17NO4/c1-3-10(4-2)7(9(13)14)5-6-8(11)12/h7H,3-6H2,1-2H3,(H,11,12)(H,13,14) | NXWYAHLLQFL<br>YDY-<br>UHFFFAOYSA-N |

| No. | ID code | Structural formula                                                                  | SMILES                                   | Molecular weight | Molecular formula                                              | IUPAC name                                   | InChI String                                                                                      | InChI Key                    |
|-----|---------|-------------------------------------------------------------------------------------|------------------------------------------|------------------|----------------------------------------------------------------|----------------------------------------------|---------------------------------------------------------------------------------------------------|------------------------------|
| 25  | 2Ba6    | 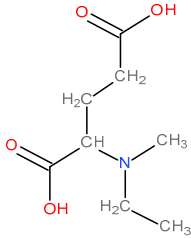   | <chem>CCN(C)C(CCC(=O)=O)C(=O)O</chem>    | 189.211          | C <sub>8</sub> H <sub>15</sub> NO <sub>4</sub>                 | 2-[ethyl(methyl)amino]pentanedioic acid      | InChI=1S/C8H15NO4/c1-3-9(2)6(8(12)13)4-5-7(10)11/h6H,3-5H2,1-2H3,(H,10,11)(H,12,13)               | RTJZKUDEFMSLYMP-UHFFFAOYSA-N |
| 26  | 2Ba6a   |    | <chem>OC(=O)CCC(N(CCCl)CCl)C(=O)O</chem> | 272.12           | C <sub>9</sub> H <sub>15</sub> Cl <sub>2</sub> NO <sub>4</sub> | 2-[bis(2-chloroethyl)amino]pentanedioic acid | InChI=1S/C9H15Cl2NO4/c10-3-5-12(6-4-11)7(9(15)16)1-2-8(13)14/h7H,1-6H2,(H,13,14)(H,15,16)         | GPSOFGZZMYRTRE-UHFFFAOYSA-N  |
| 27  | 2Ca1    |   | <chem>OC(=O)C(O)CC(=O)O</chem>           | 148.114          | C <sub>5</sub> H <sub>8</sub> O <sub>5</sub>                   | 2-hydroxypentanedioic acid                   | InChI=1S/C5H8O5/c6-3(5(9)10)1-2-4(7)8/h3,6H,1-2H2,(H,7,8)(H,9,10)                                 | HWXBTNAVRSUOJR-UHFFFAOYSA-N  |
| 28  | 3Aa1    |  | <chem>OC(=O)CCC(NC1=NC=CS1)C(=O)O</chem> | 230.24           | C <sub>8</sub> H <sub>10</sub> N <sub>2</sub> O <sub>4</sub> S | 2-[(1,3-thiazol-2-yl)amino]pentanedioic acid | InChI=1S/C8H10N2O4S/c11-6(12)2-1-5(7(13)14)10-8-9-3-4-15-8/h3-5H,1-2H2,(H,9,10)(H,11,12)(H,13,14) | COUCFTITYQVLOF-UHFFFAOYSA-N  |

| No. | ID code | Structural formula | SMILES                                  | Molecular weight | Molecular formula                                              | IUPAC name                                                   | InChI String                                                                              | InChI Key                           |
|-----|---------|--------------------|-----------------------------------------|------------------|----------------------------------------------------------------|--------------------------------------------------------------|-------------------------------------------------------------------------------------------|-------------------------------------|
| 29  | 3Aa2    |                    | <chem>OC(=O)CCC(N1CSC=C1)C(=O)O</chem>  | 217.24           | C <sub>8</sub> H <sub>11</sub> NO <sub>4</sub> S               | 2-(2,3-dihydro-1,3-thiazol-1-yl)pentanedioic acid            | InChI=1S/C8H11NO4S/c10-7(11)2-1-6(8(12)13)9-3-4-14-5-9/h3-4,6H,1-2,5H2,(H,10,11)(H,12,13) | FTQFPUBQARGJ<br>BF-<br>UHFFFAOYSA-N |
| 30  | 3Aa3    |                    | <chem>NC(CCC(=O)C1=CN=CS1)C(=O)O</chem> | 214.24           | C <sub>8</sub> H <sub>10</sub> N <sub>2</sub> O <sub>3</sub> S | 2-amino-5-oxo-5-(1,3-thiazol-5-yl)pentanoic acid             | InChI=1S/C8H10N2O3S/c9-5(8(12)13)1-2-6(11)7-3-10-4-14-7/h3-5H,1-2,9H2,(H,12,13)           | PTRRYBHQTDNN<br>OS-<br>UHFFFAOYSA-N |
| 31  | 3Aa4    |                    | <chem>NC(CCC(=O)N1CSC=C1)C(=O)O</chem>  | 216.26           | C <sub>8</sub> H <sub>12</sub> N <sub>2</sub> O <sub>3</sub> S | 2-amino-5-(2,3-dihydro-1,3-thiazol-3-yl)-5-oxopentanoic acid | InChI=1S/C8H12N2O3S/c9-6(8(12)13)1-2-7(11)10-3-4-14-5-10/h3-4,6H,1-2,5,9H2,(H,12,13)      | LLBOCRFUIYTIB<br>D-UHFFFAOYSA-N     |
| 32  | 3Aa5    |                    | <chem>NC(CCC(O)=O)C(=O)C1=CN=CS1</chem> | 214.24           | C <sub>8</sub> H <sub>10</sub> N <sub>2</sub> O <sub>3</sub> S | 4-amino-5-oxo-5-(1,3-thiazol-5-yl)pentanoic acid             | InChI=1S/C8H10N2O3S/c9-5(1-2-7(11)12)8(13)6-3-10-4-14-6/h3-5H,1-2,9H2,(H,11,12)           | WVQHOIOTBAD<br>ZQN-<br>UHFFFAOYSA-N |

| No. | ID code | Structural formula                                                                  | SMILES                                 | Molecular weight | Molecular formula                                              | IUPAC name                                                   | InChI String                                                                         | InChI Key                           |
|-----|---------|-------------------------------------------------------------------------------------|----------------------------------------|------------------|----------------------------------------------------------------|--------------------------------------------------------------|--------------------------------------------------------------------------------------|-------------------------------------|
| 33  | 3Aa6    | 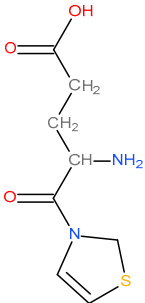   | <chem>NC(CCC(O)=O)C(=O)N1CSC=C1</chem> | 216.26           | C <sub>8</sub> H <sub>12</sub> N <sub>2</sub> O <sub>3</sub> S | 4-amino-5-(2,3-dihydro-1,3-thiazol-3-yl)-5-oxopentanoic acid | InChI=1S/C8H12N2O3S/c9-6(1-2-7(11)12)8(13)10-3-4-14-5-10/h3-4,6H,1-2,5,9H2,(H,11,12) | DREMUKVMUYK<br>PSG-<br>UHFFFAOYSA-N |
| 34  | 3Aa7    |    | <chem>O=C1CCCC(=O)N1C1=NC=CS1</chem>   | 196.22           | C <sub>8</sub> H <sub>8</sub> N <sub>2</sub> O <sub>2</sub> S  | 1-(1,3-thiazol-2-yl)piperidine-2,6-dione                     | InChI=1S/C8H8N2O2S/c11-6-2-1-3-7(12)10(6)8-9-4-5-13-8/h4-5H,1-3H2                    | KLUUFWQUMIT<br>GBV-<br>UHFFFAOYSA-N |
| 35  | 3Aa8    |   | <chem>O=C1CCC(C2=NC=CS2)C(=O)N1</chem> | 196.22           | C <sub>8</sub> H <sub>8</sub> N <sub>2</sub> O <sub>2</sub> S  | 3-(1,3-thiazol-2-yl)piperidine-2,6-dione                     | InChI=1S/C8H8N2O2S/c11-6-2-1-5(7(12)10-6)8-9-3-4-13-8/h3-5H,1-2H2,(H,10,11,12)       | YXZQPNDUEFTS<br>FL-<br>UHFFFAOYSA-N |
| 36  | 3Aa9    |  | <chem>O=C1CCC(N2CSC=C2)C(=O)O1</chem>  | 199.22           | C <sub>8</sub> H <sub>9</sub> NO <sub>3</sub> S                | 3-(2,3-dihydro-1,3-thiazol-3-yl)oxane-2,6-dione              | InChI=1S/C8H9NO3S/c10-7-2-1-6(8(11)12-7)9-3-4-13-5-9/h3-4,6H,1-2,5H2                 | QZCBBFBGLCBE<br>SD-<br>UHFFFAOYSA-N |

| No. | ID code | Structural formula                                                                  | SMILES                                   | Molecular weight | Molecular formula                                             | IUPAC name                                      | InChI String                                                                                | InChI Key                   |
|-----|---------|-------------------------------------------------------------------------------------|------------------------------------------|------------------|---------------------------------------------------------------|-------------------------------------------------|---------------------------------------------------------------------------------------------|-----------------------------|
| 37  | 3Ab10   | 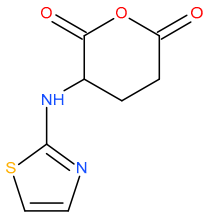   | <chem>O=C1CCC(NC2=NC=CS2)C(=O)O1</chem>  | 212.22           | C <sub>8</sub> H <sub>8</sub> N <sub>2</sub> O <sub>3</sub> S | 3-[(1,3-thiazol-2-yl)amino]oxane-2,6-dione      | InChI=1S/C8H8N2O3S/c11-6-2-1-5(7(12)13-6)10-8-9-3-4-14-8/h3-5H,1-2H2,(H,9,10)               | LYMKTCGBZJZMJT-UHFFFAOYSA-N |
| 38  | 3Ba1    |    | <chem>OC(=O)CCC(NC1=CN=CO1)C(=O)O</chem> | 214.177          | C <sub>8</sub> H <sub>10</sub> N <sub>2</sub> O <sub>5</sub>  | 2-[(1,3-oxazol-5-yl)amino]pentanedioic acid     | InChI=1S/C8H10N2O5/c11-7(12)2-1-5(8(13)14)10-6-3-9-4-15-6/h3-5,10H,1-2H2,(H,11,12)(H,13,14) | VYBRWYKIDGAHKK-UHFFFAOYSA-N |
| 39  | 3Ba2    |   | <chem>NC(CCC(=O)C1=CN=CO1)C(=O)O</chem>  | 198.178          | C <sub>8</sub> H <sub>10</sub> N <sub>2</sub> O <sub>4</sub>  | 2-amino-5-(1,3-oxazol-5-yl)-5-oxopentanoic acid | InChI=1S/C8H10N2O4/c9-5(8(12)13)1-2-6(11)7-3-10-4-14-7/h3-5H,1-2,9H2,(H,12,13)              | QPERUFXSMXFFRT-UHFFFAOYSA-N |
| 40  | 3Ba3    |  | <chem>NC(CCC(O)=O)C(=O)C1=CN=CO1</chem>  | 198.178          | C <sub>8</sub> H <sub>10</sub> N <sub>2</sub> O <sub>4</sub>  | 4-amino-5-(1,3-oxazol-5-yl)-5-oxopentanoic acid | InChI=1S/C8H10N2O4/c9-5(1-2-7(11)12)8(13)6-3-10-4-14-6/h3-5H,1-2,9H2,(H,11,12)              | PQAQFMNDADADSD-UHFFFAOYSA-N |

| No. | ID code | Structural formula                                                                  | SMILES                                      | Molecular weight | Molecular formula                                              | IUPAC name                                          | InChI String                                                                       | InChI Key                   |
|-----|---------|-------------------------------------------------------------------------------------|---------------------------------------------|------------------|----------------------------------------------------------------|-----------------------------------------------------|------------------------------------------------------------------------------------|-----------------------------|
| 41  | 3Ba4    | 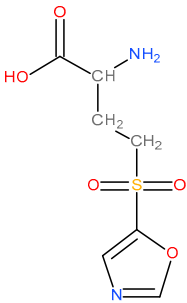   | <chem>NC(CCS(=O)(=O)C1=CN=CO1)C(=O)O</chem> | 234.23           | C <sub>7</sub> H <sub>10</sub> N <sub>2</sub> O <sub>5</sub> S | 2-amino-4-(1,3-oxazole-5-sulfonyl)butanoic acid     | InChI=1S/C7H10N2O5S/c8-5(7(10)11)1-2-15(12,13)6-3-9-4-14-6/h3-5H,1-2,8H2,(H,10,11) | QGLSYLKIZWMURH-UHFFFAOYSA-N |
| 42  | 3Ba5    |    | <chem>O=C1CCCC(N2COC=C2)C(=O)N1</chem>      | 182.179          | C <sub>8</sub> H <sub>10</sub> N <sub>2</sub> O <sub>3</sub>   | 3-(2,3-dihydro-1,3-oxazol-1-yl)piperidine-2,6-dione | InChI=1S/C8H10N2O3/c11-7-2-1-6(8(12)9-7)10-3-4-13-5-10/h3-4,6H,1-2,5H2,(H,9,11,12) | RMYQRMNPXUEMHX-UHFFFAOYSA-N |
| 43  | 3Ba6    |   | <chem>O=C1CCCC(=O)N1C1=CC=CN1</chem>        | 180.163          | C <sub>8</sub> H <sub>8</sub> N <sub>2</sub> O <sub>3</sub>    | 1-(1,3-oxazol-4-yl)piperidine-2,6-dione             | InChI=1S/C8H8N2O3/c11-7-2-1-3-8(12)10(7)6-4-13-5-9-6/h4-5H,1-3H2                   | KRFQKBUQYJNZAK-UHFFFAOYSA-N |
| 44  | 3Bb7    |  | <chem>O=C1CCC(N2COC=C2)C(=O)O1</chem>       | 183.163          | C <sub>8</sub> H <sub>9</sub> NO <sub>4</sub>                  | 3-(2,3-dihydro-1,3-oxazol-1-yl)oxane-2,6-dione      | InChI=1S/C8H9NO4/c10-7-2-1-6(8(11)13-7)9-3-4-12-5-9/h3-4,6H,1-2,5H2                | LEXIVLNRNLGLFK-UHFFFAOYSA-N |

| No. | ID code | Structural formula                                                                 | SMILES                                                 | Molecular weight | Molecular formula                                                             | IUPAC name                                                  | InChI String                                                                                                          | InChI Key                           |
|-----|---------|------------------------------------------------------------------------------------|--------------------------------------------------------|------------------|-------------------------------------------------------------------------------|-------------------------------------------------------------|-----------------------------------------------------------------------------------------------------------------------|-------------------------------------|
| 45  | 3Bb8    | 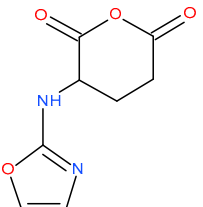  | <chem>O=C1CCC(NC2=NC=CO2)C(=O)O1</chem>                | 196.162          | C <sub>8</sub> H <sub>8</sub> N <sub>2</sub> O <sub>4</sub>                   | 3-[(1,3-oxazol-2-yl)amino]oxane-2,6-dione                   | InChI=1S/C8H8N2O4/c11-6-2-1-5(7(12)14-6)10-8-9-3-4-13-8/h3-5H,1-2H2,(H,9,10)                                          | NNJKXRQMIMZL<br>LF-<br>UHFFFAOYSA-N |
| 46  | 4Aa1    |   | <chem>OC(=O)CCC(C(=O)O)C1=CC=C(C=C1)N(CCCl)CCCl</chem> | 348.22           | C <sub>15</sub> H <sub>19</sub> Cl <sub>2</sub> NO <sub>4</sub>               | 2-{4-[bis(2-chloroethyl)amino]phenyl}pentanedioic acid      | InChI=1S/C15H19Cl2NO4/c16-7-9-18(10-8-17)12-3-1-11(2-4-12)13(15(21)22)5-6-14(19)20/h1-4,13H,5-10H2,(H,19,20)(H,21,22) | MOSFIJXAXDLO<br>ML-<br>UHFFFAOYSA-N |
| 47  | 4Aa2    |  | <chem>NC(CCCC1=CC=C(C=C1)N(CCCl)CCCl)C(=O)O</chem>     | 333.25           | C <sub>15</sub> H <sub>22</sub> Cl <sub>2</sub> N <sub>2</sub> O <sub>2</sub> | 2-amino-5-{4-[bis(2-chloroethyl)amino]phenyl}pentanoic acid | InChI=1S/C15H22Cl2N2O2/c16-8-10-19(11-9-17)13-6-4-12(5-7-13)2-1-3-14(18)15(20)21/h4-7,14H,1-3,8-11,18H2,(H,20,21)     | YSSSVODKUJTK<br>AF-<br>UHFFFAOYSA-N |



| No. | ID code | Structural formula                                                                  | SMILES                                    | Molecular weight | Molecular formula     | IUPAC name                                        | InChI String                                                                                 | InChI Key                   |
|-----|---------|-------------------------------------------------------------------------------------|-------------------------------------------|------------------|-----------------------|---------------------------------------------------|----------------------------------------------------------------------------------------------|-----------------------------|
| 48  | 4Aa3    | 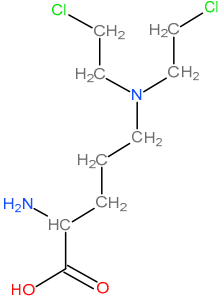   | <chem>NC(CCCN(CCCl)CCC(=O)O</chem>        | 257.16           | $C_9H_{18}Cl_2N_2O_2$ | 2-amino-5-[bis(2-chloroethyl)amino]pentanoic acid | InChI=1S/C9H18Cl2N2O2/c10-3-6-13(7-4-11)5-1-2-8(12)9(14)15/h8H,1-7,12H2,(H,14,15)            | IEDWQWUZMVJOSQ-UHFFFAOYSA-N |
| 49  | 4Ab1    |    | <chem>NC(=O)N(N=O)C(CC(=O)O)C(=O)O</chem> | 219.153          | $C_6H_9N_3O_6$        | 2-[carbamoyl(nitroso)amino]pentanedioic acid      | InChI=1S/C6H9N3O6/c7-6(14)9(8-15)3(5(12)13)1-2-4(10)11/h3H,1-2H2,(H2,7,14)(H,10,11)(H,12,13) | DZPDAZBHGBSWTO-UHFFFAOYSA-N |
| 50  | 4Ab2    |   | <chem>NC(CCC(=O)NN=O)C(=O)O</chem>        | 175.144          | $C_5H_9N_3O_4$        | 2-amino-4-(N'-oxohydrazinecarbonyl)butanoic acid  | InChI=1S/C5H9N3O4/c6-3(5(10)11)1-2-4(9)7-8-12/h3H,1-2,6H2,(H,10,11)(H,7,9,12)                | CDUHCSDRKGGAX-UHFFFAOYSA-N  |
| 51  | 4Ac1    |  | <chem>CNNC(CCC(=O)O)C(=O)O</chem>         | 176.172          | $C_6H_{12}N_2O_4$     | 2-(2-methylhydrazin-1-yl)pentanedioic acid        | InChI=1S/C6H12N2O4/c1-7-8-4(6(11)12)2-3-5(9)10/h4,7-8H,2-3H2,1H3,(H,9,10)(H,11,12)           | HGWHOHGOLUXKQT-UHFFFAOYSA-N |

| No. | ID code | Structural formula | SMILES                                      | Molecular weight | Molecular formula                                               | IUPAC name                                            | InChI String                                                                            | InChI Key                    |
|-----|---------|--------------------|---------------------------------------------|------------------|-----------------------------------------------------------------|-------------------------------------------------------|-----------------------------------------------------------------------------------------|------------------------------|
| 52  | 4Ad1    |                    | <chem>CS(=O)(=O)OCCC(N)OS(C)(=O)=O</chem>   | 247.28           | C <sub>5</sub> H <sub>13</sub> NO <sub>6</sub> S <sub>2</sub>   | 1-amino-3-(methanesulfonyloxy)propyl methanesulfonate | InChI=1S/C5H13NO6S2/c1-13(7,8)11-4-3-5(6)12-14(2,9)10/h5H,3-4,6H2,1-2H3                 | NPHGXBQFTVQTFH-UHFFFAOYSA-N  |
| 53  | 4Ad2    |                    | <chem>CS(=O)(=O)OCC(N)COS(C)(=O)=O</chem>   | 247.28           | C <sub>5</sub> H <sub>13</sub> NO <sub>6</sub> S <sub>2</sub>   | 2-amino-3-(methanesulfonyloxy)propyl methanesulfonate | InChI=1S/C5H13NO6S2/c1-13(7,8)11-3-5(6)4-12-14(2,9)10/h5H,3-4,6H2,1-2H3                 | OJIHJLWBACHVEK-UHFFFAOYSA-N  |
| 54  | 4Ad3    |                    | <chem>CS(=O)(=O)OCCCC(N)COS(C)(=O)=O</chem> | 275.33           | C <sub>7</sub> H <sub>17</sub> NO <sub>6</sub> S <sub>2</sub>   | 2-amino-5-(methanesulfonyloxy)pentyl methanesulfonate | InChI=1S/C7H17NO6S2/c1-15(9,10)13-5-3-4-7(8)6-14-16(2,11)12/h7H,3-6,8H2,1-2H3           | LXWPOHSRFRSTMX-UHFFFAOYSA-N  |
| 55  | 4Ae1    |                    | <chem>N.N.O=C1CCCC(=O)O[Pt]O1</chem>        | 359.245          | C <sub>5</sub> H <sub>12</sub> N <sub>2</sub> O <sub>4</sub> Pt | 2,2-diimino-1,3-dioxo-2-platinacyclooctane-4,8-dione  | InChI=1S/C5H8O4.2H2N.Pt/c6-4(7)2-1-3-5(8)9;;/h1-3H2,(H,6,7)(H,8,9);2*1H2;/q;2*-1;+4/p-2 | LZNMKYKZLJCAVHB-UHFFFAOYSA-L |

| No. | ID code | Structural formula                                                                  | SMILES                                 | Molecular weight | Molecular formula                                               | IUPAC name                                                | InChI String                                                                               | InChI Key                           |
|-----|---------|-------------------------------------------------------------------------------------|----------------------------------------|------------------|-----------------------------------------------------------------|-----------------------------------------------------------|--------------------------------------------------------------------------------------------|-------------------------------------|
| 56  | 4Ae2    | 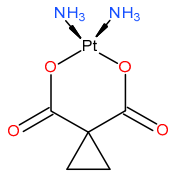   | <chem>N.N.O=C1O[Pt]OC(=O)C1CC1</chem>  | 357.229          | C <sub>5</sub> H <sub>10</sub> N <sub>2</sub> O <sub>4</sub> Pt | 6,6-diimino-5,7-dioxa-6-platinaspiro[2.5]octane-4,8-dione | InChI=1S/C5H6O4.2H2N.Pt/c6-3(7)5(1-2-5)4(8)9;;;/h1-2H2,(H,6,7)(H,8,9);2*1H2;/q;2*-1;+4/p-2 | BRHJVUWBZGX<br>LHE-<br>UHFFFAOYSA-L |
| 57  | 4Ba1    |    | <chem>NC(C(O)=O)C(=O)OCOC=O</chem>     | 177.112          | C <sub>5</sub> H <sub>7</sub> NO <sub>6</sub>                   | 2-amino-3-[(formyloxy)methoxy]-3-oxopropanoic acid        | InChI=1S/C5H7NO6/c6-3(4(8)9)5(10)12-2-11-1-7/h1,3H,2,6H2,(H,8,9)                           | AJBXFUNGAPVX<br>CW-<br>UHFFFAOYSA-N |
| 58  | 4Ba2    |   | <chem>CC(=O)OCOC(=O)C(N)C(=O)=O</chem> | 191.139          | C <sub>6</sub> H <sub>9</sub> NO <sub>6</sub>                   | 3-[(acetyloxy)methoxy]-2-amino-3-oxopropanoic acid        | InChI=1S/C6H9NO6/c1-3(8)12-2-13-6(11)4(7)5(9)10/h4H,2,7H2,1H3,(H,9,10)                     | VMQNAFGZNCK<br>KLS-<br>UHFFFAOYSA-N |
| 59  | 4Ba3    |  | <chem>CC(=O)OCOC(=O)CN</chem>          | 147.13           | C <sub>5</sub> H <sub>9</sub> NO <sub>4</sub>                   | (acetyloxy)methyl 2-aminoacetate                          | InChI=1S/C5H9NO4/c1-4(7)9-3-10-5(8)2-6/h2-3,6H2,1H3                                        | MGRXHFJZHMV<br>AKB-<br>UHFFFAOYSA-N |

| No. | ID code | Structural formula                                                                 | SMILES                                          | Molecular weight | Molecular formula                              | IUPAC name                                          | InChI String                                                                     | InChI Key                   |
|-----|---------|------------------------------------------------------------------------------------|-------------------------------------------------|------------------|------------------------------------------------|-----------------------------------------------------|----------------------------------------------------------------------------------|-----------------------------|
| 60  | 4Ba4    | 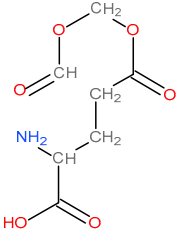  | <chem>NC(CCC(=O)OCOC(=O)C(O)=O)C(O)=O</chem>    | 205.166          | C <sub>7</sub> H <sub>11</sub> NO <sub>6</sub> | 2-amino-5-[(formyloxy)methoxy]-5-oxopentanoic acid  | InChI=1S/C7H11NO6/c8-5(7(11)12)1-2-6(10)14-4-13-3-9/h3,5H,1-2,4,8H2,(H,11,12)    | KFGASKCYGLPOQZ-UHFFFAOYSA-N |
| 61  | 4Ba5    |   | <chem>CC(=O)OCOC(=O)CC(C(N)C(O)=O)C(O)=O</chem> | 219.193          | C <sub>8</sub> H <sub>13</sub> NO <sub>6</sub> | 5-[(acetyloxy)methoxy]-2-amino-5-oxopentanoic acid  | InChI=1S/C8H13NO6/c1-5(10)14-4-15-7(11)3-2-6(9)8(12)13/h6H,2-4,9H2,1H3,(H,12,13) | JSZGUAKGOBNWIO-UHFFFAOYSA-N |
| 62  | 4Ba6    |  | <chem>O=COCOC(=O)N1C(=O)CCCC1=O</chem>          | 215.161          | C <sub>8</sub> H <sub>9</sub> NO <sub>6</sub>  | (formyloxy)methyl 2,6-dioxopiperidine-1-carboxylate | InChI=1S/C8H9NO6/c10-4-14-5-15-8(13)9-6(11)2-1-3-7(9)12/h4H,1-3,5H2              | XKBWEHPUMQOETN-UHFFFAOYSA-N |

| No. | ID code | Structural formula                                                                 | SMILES                                   | Molecular weight | Molecular formula                                            | IUPAC name                                        | InChI String                                                            | InChI Key                           |
|-----|---------|------------------------------------------------------------------------------------|------------------------------------------|------------------|--------------------------------------------------------------|---------------------------------------------------|-------------------------------------------------------------------------|-------------------------------------|
| 63  | 4Ba7    | 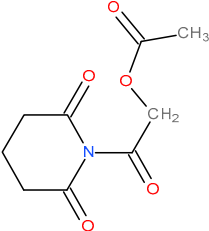  | <chem>CC(=O)OCC(=O)N1C(=O)CCCC1=O</chem> | 213.189          | C <sub>9</sub> H <sub>11</sub> NO <sub>5</sub>               | 2-(2,6-dioxopiperidin-1-yl)-2-oxoethyl acetate    | InChI=1S/C9H11NO5/c1-6(11)15-5-9(14)10-7(12)3-2-4-8(10)13/h2-5H2,1H3    | INUOZQWSZWU<br>SJW-<br>UHFFFAOYSA-N |
| 64  | 4Ca1    |   | <chem>CC(CC(O)=O)C(=N)NO</chem>          | 146.146          | C <sub>5</sub> H <sub>10</sub> N <sub>2</sub> O <sub>3</sub> | 3-(N-hydroxycarbamimidoyl)-3-methylpropanoic acid | InChI=1S/C5H10N2O3/c1-3(2-4(8)9)5(6)7-10/h3,10H,2H2,1H3,(H2,6,7)(H,8,9) | OOQGEIDHPCFV<br>DR-<br>UHFFFAOYSA-N |
| 65  | 4Ca2    |   | <chem>ONC(=N)CCCC(O)=O</chem>            | 146.146          | C <sub>5</sub> H <sub>10</sub> N <sub>2</sub> O <sub>3</sub> | 4-(N-hydroxycarbamimidoyl)butanoic acid           | InChI=1S/C5H10N2O3/c6-4(7-10)2-1-3-5(8)9/h10H,1-3H2,(H2,6,7)(H,8,9)     | QAJMVQKBIQNJ<br>FH-<br>UHFFFAOYSA-N |
| 66  | 4Ca3    |  | <chem>CC(CC(O)=O)C(=O)NO</chem>          | 147.13           | C <sub>5</sub> H <sub>9</sub> NO <sub>4</sub>                | 3-(hydroxycarbamoyl)-3-methylpropanoic acid       | InChI=1S/C5H9NO4/c1-3(2-4(7)8)5(9)6-10/h3,10H,2H2,1H3,(H,6,9)(H,7,8)    | MEFOEISBUCQC<br>BX-<br>UHFFFAOYSA-N |

| No. | ID code | Structural formula                                                                  | SMILES                             | Molecular weight | Molecular formula                                           | IUPAC name                                                       | InChI String                                                                 | InChI Key                   |
|-----|---------|-------------------------------------------------------------------------------------|------------------------------------|------------------|-------------------------------------------------------------|------------------------------------------------------------------|------------------------------------------------------------------------------|-----------------------------|
| 67  | 4Ca4    | 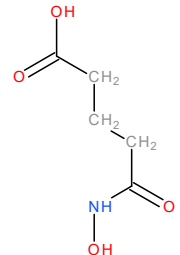   | <chem>ONC(=O)CCCC(O)=O</chem>      | 147.13           | C <sub>5</sub> H <sub>9</sub> NO <sub>4</sub>               | 4-(hydroxycarbamoyl)butanoic acid                                | InChI=1S/C5H9NO4/c7-4(6-10)2-1-3-5(8)9/h10H,1-3H2,(H,6,7)(H,8,9)             | WNMOIVFBJXRXSY-UHFFFAOYSA-N |
| 68  | 4Cb1    |    | <chem>ONC(=N)C1CC1C(O)=O</chem>    | 144.13           | C <sub>5</sub> H <sub>8</sub> N <sub>2</sub> O <sub>3</sub> | 2-(N-hydroxycarbamimidoyl)cyclopropane-1-carboxylic acid         | InChI=1S/C5H8N2O3/c6-4(7-10)2-1-3(2)5(8)9/h2-3,10H,1H2,(H2,6,7)(H,8,9)       | XGIFGDFXFLPXID-UHFFFAOYSA-N |
| 69  | 4Cb2    |    | <chem>NC1(CC1C(=N)NO)C(O)=O</chem> | 159.145          | C <sub>5</sub> H <sub>9</sub> N <sub>3</sub> O <sub>3</sub> | 1-amino-2-(N-hydroxycarbamimidoyl)cyclopropane-1-carboxylic acid | InChI=1S/C5H9N3O3/c6-3(8-11)2-1-5(2,7)4(9)10/h2,11H,1,7H2,(H2,6,8)(H,9,10)   | SIXAHSQNNNGKON-UHFFFAOYSA-N |
| 70  | 4Cb3    |   | <chem>ONC(=N)CC1NC1C(O)=O</chem>   | 159.145          | C <sub>5</sub> H <sub>9</sub> N <sub>3</sub> O <sub>3</sub> | 3-[(N-hydroxycarbamimidoyl)methyl]aziridine-2-carboxylic acid    | InChI=1S/C5H9N3O3/c6-3(8-11)1-2-4(7-2)5(9)10/h2,4,7,11H,1H2,(H2,6,8)(H,9,10) | DQJFFVUIGCSRIY-UHFFFAOYSA-N |
| 71  | 4Cb4    |  | <chem>CN1C(C1C(=N)NO)C(O)=O</chem> | 159.145          | C <sub>5</sub> H <sub>9</sub> N <sub>3</sub> O <sub>3</sub> | 3-(N-hydroxycarbamimidoyl)-1-methylaziridine-2-carboxylic acid   | InChI=1S/C5H9N3O3/c1-8-2(4(6)7-11)3(8)5(9)10/h2-3,11H,1H3,(H2,6,7)(H,9,10)   | GMVNMHGBMYOXJZ-UHFFFAOYSA-N |

| No. | ID code | Structural formula                                                                  | SMILES                                | Molecular weight | Molecular formula                                              | IUPAC name                                                      | InChI String                                                                      | InChI Key                   |
|-----|---------|-------------------------------------------------------------------------------------|---------------------------------------|------------------|----------------------------------------------------------------|-----------------------------------------------------------------|-----------------------------------------------------------------------------------|-----------------------------|
| 72  | 4Cb5    | 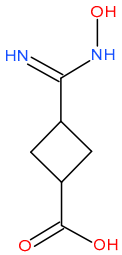   | <chem>ONC(=N)C1CC(C1)C(=O)O</chem>    | 158.157          | C <sub>6</sub> H <sub>10</sub> N <sub>2</sub> O <sub>3</sub>   | 3-(N-hydroxycarbamimidoyl)cyclobutane-1-carboxylic acid         | InChI=1S/C6H10N2O3/c7-5(8-11)3-1-4(2-3)6(9)10/h3-4,11H,1-2H2,(H2,7,8)(H,9,10)     | VIKIMZYMCMRRE-UHFFFAOYSA-N  |
| 73  | 4Cb6    |    | <chem>NC1(CC(C1)C(=N)NO)C(=O)O</chem> | 173.172          | C <sub>6</sub> H <sub>11</sub> N <sub>3</sub> O <sub>3</sub>   | 1-amino-3-(N-hydroxycarbamimidoyl)cyclobutane-1-carboxylic acid | InChI=1S/C6H11N3O3/c7-4(9-12)3-1-6(8,2-3)5(10)11/h3,12H,1-2,8H2,(H2,7,9)(H,10,11) | SRKMBICPXQFNTE-UHFFFAOYSA-N |
| 74  | 4Cb7    |   | <chem>ONC(=N)C1CC(N1)C(=O)O</chem>    | 159.145          | C <sub>5</sub> H <sub>9</sub> N <sub>3</sub> O <sub>3</sub>    | 4-(N-hydroxycarbamimidoyl)azetidine-2-carboxylic acid           | InChI=1S/C5H9N3O3/c6-4(8-11)2-1-3(7-2)5(9)10/h2-3,7,11H,1H2,(H2,6,8)(H,9,10)      | CRSVVFUTSFLRBT-UHFFFAOYSA-N |
| 75  | 4Da1    |  | <chem>NC(CCC=S(=N)=O)C(=O)O</chem>    | 178.21           | C <sub>5</sub> H <sub>10</sub> N <sub>2</sub> O <sub>3</sub> S | 2-amino-5-[imino(oxo)-1-ambda6-sulfanylidene]pentanoic acid     | InChI=1S/C5H10N2O3S/c6-4(5(8)9)2-1-3-11(7)10/h3-4,7H,1-2,6H2,(H,8,9)              | XBPIIDUKNLDDHE-UHFFFAOYSA-N |

| No. | ID code | Structural formula | SMILES                                 | Molecular weight | Molecular formula                                              | IUPAC name                                                    | InChI String                                                                        | InChI Key                    |
|-----|---------|--------------------|----------------------------------------|------------------|----------------------------------------------------------------|---------------------------------------------------------------|-------------------------------------------------------------------------------------|------------------------------|
| 76  | 4Da2    |                    | <chem>CC(CC(N)C(O)=O)S(=N)=O</chem>    | 180.22           | C <sub>5</sub> H <sub>12</sub> N <sub>2</sub> O <sub>3</sub> S | 2-amino-4-[imino(oxo)-lambda6-sulfanyl]pentanoic acid         | InChI=1S/C5H12N2O3S/c1-3(11(7)10)2-4(6)5(8)9/h3-4,7,11H,2,6H2,1H3,(H,8,9)           | QOOMKLVWZFM OLV-UHFFFAOYSA-N |
| 77  | 4Da3    |                    | <chem>CC(CS(=N)=O)C(N)C(O)=O</chem>    | 180.22           | C <sub>5</sub> H <sub>12</sub> N <sub>2</sub> O <sub>3</sub> S | 2-amino-4-[imino(oxo)-lambda6-sulfanyl]-3-methylbutanoic acid | InChI=1S/C5H12N2O3S/c1-3(2-11(7)10)4(6)5(8)9/h3-4,7,11H,2,6H2,1H3,(H,8,9)           | FDQFGEXLUNEE LH-UHFFFAOYSA-N |
| 78  | 4Da4    |                    | <chem>NC(CCCS(O)(=N)=O)C(O)=O</chem>   | 196.22           | C <sub>5</sub> H <sub>12</sub> N <sub>2</sub> O <sub>4</sub> S | 2-amino-5-[hydroxy(imino)oxo-lambda6-sulfanyl]pentanoic acid  | InChI=1S/C5H12N2O4S/c6-4(5(8)9)2-1-3-12(7,10)11/h4H,1-3,6H2,(H,8,9)(H2,7,10,11)     | PRADIGYGFWSN IK-UHFFFAOYSA-N |
| 79  | 4Da5    |                    | <chem>CC(CC(N)C(O)=O)S(O)(=N)=O</chem> | 196.22           | C <sub>5</sub> H <sub>12</sub> N <sub>2</sub> O <sub>4</sub> S | 2-amino-4-[hydroxy(imino)oxo-lambda6-sulfanyl]pentanoic acid  | InChI=1S/C5H12N2O4S/c1-3(12(7,10)11)2-4(6)5(8)9/h3-4H,2,6H2,1H3,(H,8,9)(H2,7,10,11) | OYPMNZNTRUD KOL-UHFFFAOYSA-N |



| No. | ID code | Structural formula                                                                 | SMILES                                 | Molecular weight | Molecular formula                                              | IUPAC name                                                                  | InChI String                                                                        | InChI Key                           |
|-----|---------|------------------------------------------------------------------------------------|----------------------------------------|------------------|----------------------------------------------------------------|-----------------------------------------------------------------------------|-------------------------------------------------------------------------------------|-------------------------------------|
| 80  | 4Da6    | 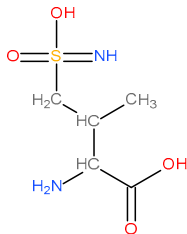  | <chem>CC(CS(O)(=N)=O)C(N)C(=O)O</chem> | 196.22           | C <sub>5</sub> H <sub>12</sub> N <sub>2</sub> O <sub>4</sub> S | 2-amino-4-[hydroxy(imino)oxo-lambda6-sulfanyl]-3-methylbutanoic acid        | InChI=1S/C5H12N2O4S/c1-3(2-12(7,10)11)4(6)5(8)9/h3-4H,2,6H2,1H3,(H,8,9)(H2,7,10,11) | HPOATHZDVDM<br>TSL-<br>UHFFFAOYSA-N |
| 81  | 4Da7    |   | <chem>CS(=N)(=O)C1CC1(N)C(=O)O</chem>  | 178.21           | C <sub>5</sub> H <sub>10</sub> N <sub>2</sub> O <sub>3</sub> S | 1-amino-2-[imino(methyl)oxo-lambda6-sulfanyl]cyclopropane-1-carboxylic acid | InChI=1S/C5H10N2O3S/c1-11(7,10)3-2-5(3,6)4(8)9/h3,7H,2,6H2,1H3,(H,8,9)              | YJGMPCSCQDUF<br>MV-<br>UHFFFAOYSA-N |
| 82  | 4Da8    |   | <chem>CN1C(C1S(C)(=N)=O)C(=O)O</chem>  | 178.21           | C <sub>5</sub> H <sub>10</sub> N <sub>2</sub> O <sub>3</sub> S | 3-[imino(methyl)oxo-lambda6-sulfanyl]-1-methylaziridine-2-carboxylic acid   | InChI=1S/C5H10N2O3S/c1-7-3(5(8)9)4(7)11(2,6)10/h3-4,6H,1-2H3,(H,8,9)                | RINRQUVMNZBF<br>RE-<br>UHFFFAOYSA-N |
| 83  | 4Da9    |  | <chem>CC1(NC1S(C)(=N)=O)C(=O)O</chem>  | 178.21           | C <sub>5</sub> H <sub>10</sub> N <sub>2</sub> O <sub>3</sub> S | 3-[imino(methyl)oxo-lambda6-sulfanyl]-2-methylaziridine-2-carboxylic acid   | InChI=1S/C5H10N2O3S/c1-5(4(8)9)3(7-5)11(2,6)10/h3,6-7H,1-2H3,(H,8,9)                | JWUGTMIVGSC<br>WEJ-<br>UHFFFAOYSA-N |

| No. | ID code | Structural formula                                                                  | SMILES                                   | Molecular weight | Molecular formula                                              | IUPAC name                                                                 | InChI String                                                                   | InChI Key                   |
|-----|---------|-------------------------------------------------------------------------------------|------------------------------------------|------------------|----------------------------------------------------------------|----------------------------------------------------------------------------|--------------------------------------------------------------------------------|-----------------------------|
| 84  | 4Da10   | 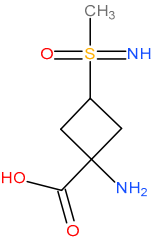   | <chem>CS(=N)(=O)C1CC(N)(C1)C(=O)O</chem> | 192.23           | C <sub>6</sub> H <sub>12</sub> N <sub>2</sub> O <sub>3</sub> S | 1-amino-3-[imino(methyl)oxo-lambda6-sulfanyl]cyclobutane-1-carboxylic acid | InChI=1S/C6H12N2O3S/c1-12(8,11)4-2-6(7,3-4)5(9)10/h4,8H,2-3,7H2,1H3,(H,9,10)   | SYTQOEQFJJBMFZ-UHFFFAOYSA-N |
| 85  | 4Da11   |    | <chem>CS(=N)(=O)C1CC(N1)C(=O)O</chem>    | 178.21           | C <sub>5</sub> H <sub>10</sub> N <sub>2</sub> O <sub>3</sub> S | 4-[imino(methyl)oxo-lambda6-sulfanyl]azetidine-2-carboxylic acid           | InChI=1S/C5H10N2O3S/c1-11(6,10)4-2-3(7-4)5(8)9/h3-4,6-7H,2H2,1H3,(H,8,9)       | RFJWDYGLNRPCQW-UHFFFAOYSA-N |
| 86  | 4Db1    |   | <chem>OC(=O)C1NC1CCP(=O)(O)O</chem>      | 179.112          | C <sub>5</sub> H <sub>10</sub> NO <sub>4</sub> P               | 3-[2-(hydroxyphosphono)ethyl]aziridine-2-carboxylic acid                   | InChI=1S/C5H10NO4P/c7-5(8)4-3(6-4)1-2-11(9)10/h3-4,6,11H,1-2H2,(H,7,8)(H,9,10) | ROIDKHCLEYTORA-UHFFFAOYSA-N |
| 87  | 4Db2    |  | <chem>CP(O)(=O)C1CC1(N)C(=O)O</chem>     | 179.112          | C <sub>5</sub> H <sub>10</sub> NO <sub>4</sub> P               | 1-amino-2-[hydroxy(methyl)phosphoryl]cyclopropane-1-carboxylic acid        | InChI=1S/C5H10NO4P/c1-11(9,10)3-2-5(3,6)4(7)8/h3H,2,6H2,1H3,(H,7,8)(H,9,10)    | BVORIWUDXJXNKQ-UHFFFAOYSA-N |

| No. | ID code | Structural formula | SMILES                                  | Molecular weight | Molecular formula                                | IUPAC name                                                         | InChI String                                                                            | InChI Key                   |
|-----|---------|--------------------|-----------------------------------------|------------------|--------------------------------------------------|--------------------------------------------------------------------|-----------------------------------------------------------------------------------------|-----------------------------|
| 88  | 4Db3    |                    | <chem>CP(O)(=O)C1CC(N1)C(=O)O</chem>    | 179.112          | C <sub>5</sub> H <sub>10</sub> NO <sub>4</sub> P | 4-[hydroxy(methyl)phosphoryl]azetidine-2-carboxylic acid           | InChI=1S/C5H10NO4P/c1-11(9,10)4-2-3(6-4)5(7)8/h3-4,6H,2H2,1H3,(H,7,8)(H,9,10)           | IHPLWMFUNRLHTF-UHFFFAOYSA-N |
| 89  | 4Db4    |                    | <chem>CP(O)(=O)C1CC(N)(C1)C(=O)O</chem> | 193.139          | C <sub>6</sub> H <sub>12</sub> NO <sub>4</sub> P | 1-amino-3-[hydroxy(methyl)phosphoryl]cyclobutane-1-carboxylic acid | InChI=1S/C6H12NO4P/c1-12(10,11)4-2-6(7,3-4)5(8)9/h4H,2-3,7H2,1H3,(H,8,9)(H,10,11)       | YFDAPDBYAJGKPM-UHFFFAOYSA-N |
| 90  | 4Db5    |                    | <chem>CP(O)(=O)C1CNC(C1)C(=O)O</chem>   | 193.139          | C <sub>6</sub> H <sub>12</sub> NO <sub>4</sub> P | 4-[hydroxy(methyl)phosphoryl]pyrrolidine-2-carboxylic acid         | InChI=1S/C6H12NO4P/c1-12(10,11)4-2-5(6(8)9)7-3-4/h4-5,7H,2-3H2,1H3,(H,8,9)(H,10,11)     | KINRKWHPXWCNQE-UHFFFAOYSA-N |
| 91  | 4Db6    |                    | <chem>CP(O)(=O)C1CCNC(C1)C(=O)O</chem>  | 207.166          | C <sub>7</sub> H <sub>14</sub> NO <sub>4</sub> P | 4-[hydroxy(methyl)phosphoryl]piperidine-2-carboxylic acid          | InChI=1S/C7H14NO4P/c1-13(11,12)5-2-3-8-6(4-5)7(9)10/h5-6,8H,2-4H2,1H3,(H,9,10)(H,11,12) | WESMCDQHSFEJMX-UHFFFAOYSA-N |

| No. | ID code | Structural formula | SMILES                      | Molecular weight | Molecular formula                                             | IUPAC name                                 | InChI String                                                                              | InChI Key                       |
|-----|---------|--------------------|-----------------------------|------------------|---------------------------------------------------------------|--------------------------------------------|-------------------------------------------------------------------------------------------|---------------------------------|
| 92  | 4Dc1    |                    | NC(CCCCP(O)(O)=O)P(O)(O)=O  | 247.124          | C <sub>5</sub> H <sub>15</sub> NO <sub>6</sub> P <sub>2</sub> | (1-amino-5-phosphonopentyl)phosphonic acid | InChI=1S/C5H15NO6P2/c6-5(14(10,11)12)3-1-2-4-13(7,8)9/h5H,1-4,6H2,(H2,7,8,9)(H2,10,11,12) | CUIROQLTUJTN<br>CG-UHFFFAOYSA-N |
| 93  | 4Dc2    |                    | NC(CCCP(O)(O)=O)C P(O)(O)=O | 247.124          | C <sub>5</sub> H <sub>15</sub> NO <sub>6</sub> P <sub>2</sub> | (2-amino-5-phosphonopentyl)phosphonic acid | InChI=1S/C5H15NO6P2/c6-5(4-14(10,11)12)2-1-3-13(7,8)9/h5H,1-4,6H2,(H2,7,8,9)(H2,10,11,12) | XMSAHCRTGNR<br>VOH-UHFFFAOYSA-N |
| 94  | 4Dc3    |                    | NC(CCP(O)(O)=O)CC P(O)(O)=O | 247.124          | C <sub>5</sub> H <sub>15</sub> NO <sub>6</sub> P <sub>2</sub> | (3-amino-5-phosphonopentyl)phosphonic acid | InChI=1S/C5H15NO6P2/c6-5(1-3-13(7,8)9)2-4-14(10,11)12/h5H,1-4,6H2,(H2,7,8,9)(H2,10,11,12) | BJHPZCJWPNIHB<br>Q-UHFFFAOYSA-N |

| No. | ID code | Structural formula                                                                 | SMILES                                            | Molecular weight | Molecular formula                                                           | IUPAC name                                                           | InChI String                                                                                                      | InChI Key                           |
|-----|---------|------------------------------------------------------------------------------------|---------------------------------------------------|------------------|-----------------------------------------------------------------------------|----------------------------------------------------------------------|-------------------------------------------------------------------------------------------------------------------|-------------------------------------|
| 95  | 4Dc4    | 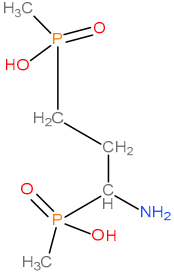  | <chem>CP(O)(=O)CCC(N)P(C)(O)=O</chem>             | 215.126          | C <sub>5</sub> H <sub>15</sub> NO <sub>4</sub> P <sub>2</sub>               | {1-amino-3-[hydroxy(methyl)phosphoryl]propyl}(methyl)phosphinic acid | InChI=1S/C5H15NO4P2/c1-11(7,8)4-3-5(6)12(2,9)10/h5H,3-4,6H2,1-2H3,(H,7,8)(H,9,10)                                 | YKAMTHKVSPQI<br>QX-<br>UHFFFAOYSA-N |
| 96  | 4Dc5    |   | <chem>CP(O)(=O)CC(N)CP(C)(O)=O</chem>             | 215.126          | C <sub>5</sub> H <sub>15</sub> NO <sub>4</sub> P <sub>2</sub>               | {2-amino-3-[hydroxy(methyl)phosphoryl]propyl}(methyl)phosphinic acid | InChI=1S/C5H15NO4P2/c1-11(7,8)3-5(6)4-12(2,9)10/h5H,3-4,6H2,1-2H3,(H,7,8)(H,9,10)                                 | RNWTUXIXSQIS<br>BS-<br>UHFFFAOYSA-N |
| 97  | 4Dc6    |  | <chem>NC1(CC1NC(P(O)(O)=O)P(O)(O)=O)C(O)=O</chem> | 290.105          | C <sub>5</sub> H <sub>12</sub> N <sub>2</sub> O <sub>8</sub> P <sub>2</sub> | 1-amino-2-[(diphosphonomethyl)amino]cyclopropane-1-carboxylic acid   | InChI=1S/C5H12N2O8P2/c6-5(3(8)9)1-2(5)7-4(16(10,11)12)17(13,14)15/h2,4,7H,1,6H2,(H,8,9)(H2,10,11,12)(H2,13,14,15) | QWCNXXAJYFJS<br>FF-<br>UHFFFAOYSA-N |

| No. | ID code | Structural formula | SMILES                                              | Molecular weight | Molecular formula                                                           | IUPAC name                                                      | InChI String                                                                                                      | InChI Key                           |
|-----|---------|--------------------|-----------------------------------------------------|------------------|-----------------------------------------------------------------------------|-----------------------------------------------------------------|-------------------------------------------------------------------------------------------------------------------|-------------------------------------|
| 98  | 4Dc7    |                    | <chem>OC(=O)C1CC(NC(P(=O)(O)=O)P(=O)(O)=O)N1</chem> | 290.105          | C <sub>5</sub> H <sub>12</sub> N <sub>2</sub> O <sub>8</sub> P <sub>2</sub> | 4-[(diphosphonomethyl)amino]azetidine-2-carboxylic acid         | InChI=1S/C5H12N2O8P2/c8-4(9)2-1-3(6-2)7-5(16(10,11)12)17(13,14)15/h2-3,5-7H,1H2,(H,8,9)(H2,10,11,12)(H2,13,14,15) | XGTGQLRSZGCO<br>KU-<br>UHFFFAOYSA-N |
| 99  | 4Dc8    |                    | <chem>OP(O)(=O)C(NC1CCCN1)P(=O)(O)=O</chem>         | 260.123          | C <sub>5</sub> H <sub>14</sub> N <sub>2</sub> O <sub>6</sub> P <sub>2</sub> | {phosphono[(pyrrolidin-2-yl)amino]methyl}phosphonic acid        | InChI=1S/C5H14N2O6P2/c8-14(9,10)5(15(11,12)13)7-4-2-1-3-6-4/h4-7H,1-3H2,(H2,8,9,10)(H2,11,12,13)                  | ZGEZSLDXXJKK<br>QC-<br>UHFFFAOYSA-N |
| 100 | 4Dd1.1  |                    | <chem>NC(CCCNO)C(=O)O</chem>                        | 148.162          | C <sub>5</sub> H <sub>12</sub> N <sub>2</sub> O <sub>3</sub>                | 2-amino-5-(hydroxylamino)pentanoic acid                         | InChI=1S/C5H12N2O3/c6-4(5(8)9)2-1-3-7-10/h4,7,10H,1-3,6H2,(H,8,9)                                                 | OZMJDTPATROL<br>QC-<br>UHFFFAOYSA-N |
| 101 | 4Dd1.2  |                    | <chem>NC1(CC1CNO)C(=O)O</chem>                      | 146.146          | C <sub>5</sub> H <sub>10</sub> N <sub>2</sub> O <sub>3</sub>                | 1-amino-2-[(hydroxylamino)methyl]cyclopropane-1-carboxylic acid | InChI=1S/C5H10N2O3/c6-5(4(8)9)1-3(5)2-7-10/h3,7,10H,1-2,6H2,(H,8,9)                                               | GIOGRIZQWPZF<br>MM-<br>UHFFFAOYSA-N |

| No. | ID code | Structural formula                                                                  | SMILES                            | Molecular weight | Molecular formula                                            | IUPAC name                                            | InChI String                                                           | InChI Key                   |
|-----|---------|-------------------------------------------------------------------------------------|-----------------------------------|------------------|--------------------------------------------------------------|-------------------------------------------------------|------------------------------------------------------------------------|-----------------------------|
| 102 | 4Dd1.3  | 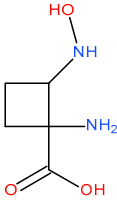   | <chem>NC1(CCC1NO)C(O)=O</chem>    | 146.146          | C <sub>5</sub> H <sub>10</sub> N <sub>2</sub> O <sub>3</sub> | 1-amino-2-(hydroxyamino)cyclobutane-1-carboxylic acid | InChI=1S/C5H10N2O3/c6-5(4(8)9)2-1-3(5)7-10/h3,7,10H,1-2,6H2,(H,8,9)    | FFPOXTKEZNXVCT-UHFFFAOYSA-N |
| 103 | 4Dd1.4  |    | <chem>ONCC1CNC1C(O)=O</chem>      | 146.146          | C <sub>5</sub> H <sub>10</sub> N <sub>2</sub> O <sub>3</sub> | 3-[(hydroxyamino)methyl]azetidine-2-carboxylic acid   | InChI=1S/C5H10N2O3/c8-5(9)4-3(1-6-4)2-7-10/h3-4,6-7,10H,1-2H2,(H,8,9)  | LNGNICJYHSCSNX-UHFFFAOYSA-N |
| 104 | 4Dd2.1  |   | <chem>NC(CCCN(O)N=O)C(O)=O</chem> | 177.16           | C <sub>5</sub> H <sub>11</sub> N <sub>3</sub> O <sub>4</sub> | 2-amino-5-[hydroxy(nitroso)amino]pentanoic acid       | InChI=1S/C5H11N3O4/c6-4(5(9)10)2-1-3-8(12)7-11/h4,12H,1-3,6H2,(H,9,10) | YEKMBVYYHZMGJV-UHFFFAOYSA-N |
| 105 | 4Dd3.1  |  | <chem>NC1CCOC1C(O)=O</chem>       | 131.131          | C <sub>5</sub> H <sub>9</sub> NO <sub>3</sub>                | 3-aminooxolane-2-carboxylic acid                      | InChI=1S/C5H9NO3/c6-3-1-2-9-4(3)5(7)8/h3-4H,1-2,6H2,(H,7,8)            | OVGHASDQKHPORW-UHFFFAOYSA-N |

| No. | ID code | Structural formula                                                                 | SMILES                                               | Molecular weight | Molecular formula                                             | IUPAC name                                                                     | InChI String                                                                                                                          | InChI Key                            |
|-----|---------|------------------------------------------------------------------------------------|------------------------------------------------------|------------------|---------------------------------------------------------------|--------------------------------------------------------------------------------|---------------------------------------------------------------------------------------------------------------------------------------|--------------------------------------|
| 106 | 4Dd4.1  | 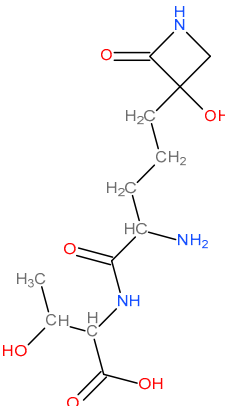  | <chem>CC(O)C(NC(=O)C(N)CCCC1(O)CNC1=O)C(=O)O</chem>  | 303.315          | C <sub>12</sub> H <sub>21</sub> N <sub>3</sub> O <sub>6</sub> | 2-[2-amino-5-(3-hydroxy-2-oxoazetidin-3-yl)pentanamido]-3-hydroxybutanoic acid | InChI=1S/C12H21N3O6/c1-6(16)8(10(18)19)15-9(17)7(13)3-2-4-12(21)5-14-11(12)20/h6-8,16,21H,2-5,13H2,1H3,(H,14,20)(H,15,17)(H,18,19)    | VJZZMLXYRMW<br>FOO-<br>UHFFFAOYSA-N  |
| 107 | 4Dd4.2  |  | <chem>CC(O)CC(NC(=O)C(N)CCCC1(O)CNC1=O)C(=O)O</chem> | 317.342          | C <sub>13</sub> H <sub>23</sub> N <sub>3</sub> O <sub>6</sub> | 2-[2-amino-5-(3-hydroxy-2-oxoazetidin-3-yl)pentanoic acid                      | InChI=1S/C13H23N3O6/c1-7(17)5-9(11(19)20)16-10(18)8(14)3-2-4-13(22)6-15-12(13)21/h7-9,17,22H,2-6,14H2,1H3,(H,15,21)(H,16,18)(H,19,20) | YFYDPDXFFNZRM<br>TQ-<br>UHFFFAOYSA-N |



| No. | ID code | Structural formula                                                                 | SMILES                                                 | Molecular weight | Molecular formula                                             | IUPAC name                                                               | InChI String                                                                                                                               | InChI Key                           |
|-----|---------|------------------------------------------------------------------------------------|--------------------------------------------------------|------------------|---------------------------------------------------------------|--------------------------------------------------------------------------|--------------------------------------------------------------------------------------------------------------------------------------------|-------------------------------------|
| 108 | 4Dd4.3  | 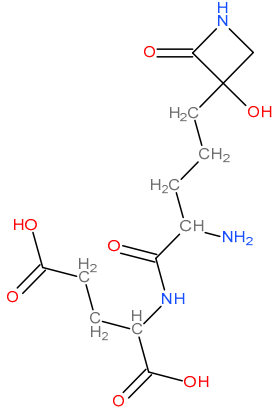  | <chem>NC(CCCC1(O)CNC1=O)C(=O)NC(CCC(O)=O)C(O)=O</chem> | 331.325          | C <sub>13</sub> H <sub>21</sub> N <sub>3</sub> O <sub>7</sub> | 2-[2-amino-5-(3-hydroxy-2-oxoazetidin-3-yl)pentanamido]pentanedioic acid | InChI=1S/C13H21N3O7/c14-7(2-1-5-13(23)6-15-12(13)22)10(19)16-8(11(20)21)3-4-9(17)18/h7-8,23H,1-6,14H2,(H,15,22)(H,16,19)(H,17,18)(H,20,21) | ATUQAECWGSN<br>LCN-<br>UHFFFAOYSA-N |
| 109 | 4Dd4.m  |  | <chem>NC(CCCC1(O)CNC1=O)C(O)=O</chem>                  | 202.21           | C <sub>8</sub> H <sub>14</sub> N <sub>2</sub> O <sub>4</sub>  | 2-amino-5-(3-hydroxy-2-oxoazetidin-3-yl)pentanoic acid                   | InChI=1S/C8H14N2O4/c9-5(6(11)12)2-1-3-8(14)4-10-7(8)13/h5,14H,1-4,9H2,(H,10,13)(H,11,12)                                                   | XAKGKLREWVV<br>PDH-<br>UHFFFAOYSA-N |

| No. | ID code | Structural formula                                                                 | SMILES                                                                          | Molecular weight | Molecular formula                               | IUPAC name                                                                                                               | InChI String                                                                                                                                                                          | InChI Key                    |
|-----|---------|------------------------------------------------------------------------------------|---------------------------------------------------------------------------------|------------------|-------------------------------------------------|--------------------------------------------------------------------------------------------------------------------------|---------------------------------------------------------------------------------------------------------------------------------------------------------------------------------------|------------------------------|
| 110 | 5Aa1    | 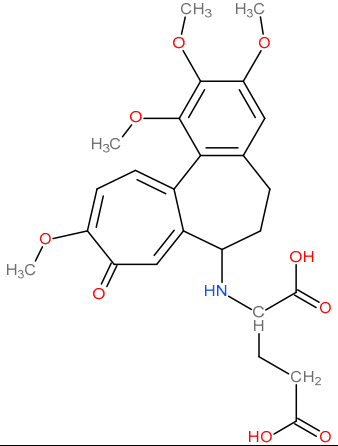  | <chem>COC1=CC2=C(C(OC)=C1OC)C1=CC=C(OC)C(=O)C=C1C(CC2)NC(CCC(O)=O)C(O)=O</chem> | 487.505          | C <sub>25</sub> H <sub>29</sub> NO <sub>9</sub> | 2-({3,4,5,14-tetramethoxy-13-oxotricyclo[9,5,0,0 2,7]hexadeca-1(16),2(7),3,5,11,14-hexaen-10-yl} amino)pentanedioic acid | InChI=1S/C25H29NO9/c1-32-19-9-6-14-15(12-18(19)27)16(26-17(25(30)31)8-10-21(28)29)7-5-13-11-20(33-2)23(34-3)24(35-4)22(13)14/h6,9,11-12,16-17,26H,5,7-8,10H2,1-4H3,(H,28,29)(H,30,31) | WAMPULPOXAG NFE-UHFFFAOYSA-N |
| 111 | 5Aa2    |  | <chem>COC1=CC2=C(C(OC)=C1OC)C1=CC=C(OC)C(=O)C=C1C(CC2)N1C(=O)CCCC1=O</chem>     | 453.491          | C <sub>25</sub> H <sub>27</sub> NO <sub>7</sub> | 1-{3,4,5,14-tetramethoxy-13-oxotricyclo[9,5,0,02,7]hexadeca-1(16),2(7),3,5,11,14-hexaen-10-yl}pi peridine-2,6-dione      | InChI=1S/C25H27NO7/c1-30-19-11-9-15-16(13-18(19)27)17(26-21(28)6-5-7-22(26)29)10-8-14-12-20(31-2)24(32-3)25(33-4)23(14)15/h9,11-13,17H,5-8,10H2,1-4H3                                 | BUDQJDDSCSSR CD-UHFFFAOYSA-N |

| No. | ID code | Structural formula                                                                 | SMILES                                                                               | Molecular weight | Molecular formula                                             | IUPAC name                                                                                                                             | InChI String                                                                                                                                                                                        | InChI Key                           |
|-----|---------|------------------------------------------------------------------------------------|--------------------------------------------------------------------------------------|------------------|---------------------------------------------------------------|----------------------------------------------------------------------------------------------------------------------------------------|-----------------------------------------------------------------------------------------------------------------------------------------------------------------------------------------------------|-------------------------------------|
| 112 | 5Aa3    | 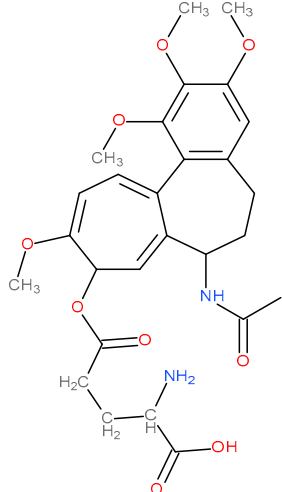  | <chem>COC1=CC2=C(C(OC)=C1OC)C1=CC=C(OC)C(OC(=O)CCC(N)C(O)=O)C=C1C(CC2)NC(C)=O</chem> | 530.574          | C <sub>27</sub> H <sub>34</sub> N <sub>2</sub> O <sub>9</sub> | 2-amino-5-({10-acetamid-o-3,4,5,14-tetramethoxytricyclo[9,5,0,02,7]hexadeca-1(16),2(7),3,5,11,14-hexaen-13-yl}oxy)-5-oxopentanoic acid | InChI=1S/C27H34N2O9/c1-14(30)29-19-9-6-15-12-22(35-3)25(36-4)26(37-5)24(15)16-7-10-20(34-2)21(13-17(16)19)38-23(31)11-8-18(28)27(32)33/h7,10,12-13,18-19,21H,6,8-9,11,28H2,1-5H3,(H,29,30)(H,32,33) | JQCAXMXOZZS<br>RB-<br>UHFFFAOYSA-N  |
| 113 | 5Aa4    |  | <chem>COC1=CC2=C(C(OC)=C1OC)C1=CC=C(OC)C(OC(=O)C(N)CCC(O)=O)C=C1C(CC2)NC(C)=O</chem> | 530.574          | C <sub>27</sub> H <sub>34</sub> N <sub>2</sub> O <sub>9</sub> | 4-amino-5-({10-acetamid-o-3,4,5,14-tetramethoxytricyclo[9,5,0,02,7]hexadeca-1(16),2(7),3,5,11,14-hexaen-13-yl}oxy)-5-oxopentanoic acid | InChI=1S/C27H34N2O9/c1-14(30)29-19-9-6-15-12-22(35-3)25(36-4)26(37-5)24(15)16-7-10-20(34-2)21(13-17(16)19)38-27(33)18(28)8-11-23(31)32/h7,10,12-13,18-19,21H,6,8-9,11,28H2,1-5H3,(H,29,30)(H,31,32) | KGMTWHJUHSZ<br>YKQ-<br>UHFFFAOYSA-N |

| No. | ID code | Structural formula                                                                | SMILES                                                                                                                  | Molecular weight | Molecular formula                                             | IUPAC name                                                                                                                                                                                               | InChI String                                                                                                                                                                                                                                           | InChI Key                           |
|-----|---------|-----------------------------------------------------------------------------------|-------------------------------------------------------------------------------------------------------------------------|------------------|---------------------------------------------------------------|----------------------------------------------------------------------------------------------------------------------------------------------------------------------------------------------------------|--------------------------------------------------------------------------------------------------------------------------------------------------------------------------------------------------------------------------------------------------------|-------------------------------------|
| 114 | 5Ba1    | 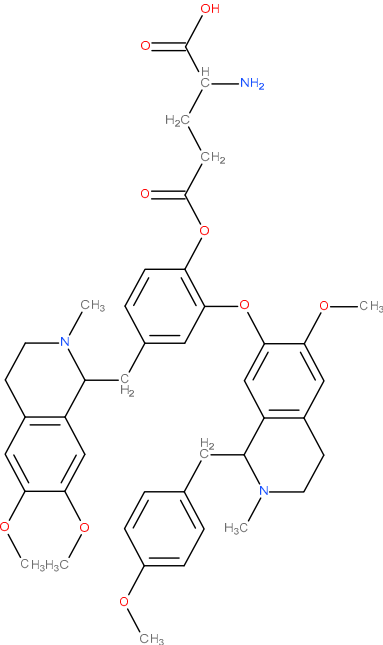 | <chem>COC1=CC=C(CC2N(C)CCC3=C2C=C(OC2=C(OC(=O)CCC(N)C(=O)=O)C=CC(CC4N(C)CCC5=C4C=C(OC)C(OC)=C5)=C2)C(OC)=C3)C=C1</chem> | 753.893          | C <sub>43</sub> H <sub>51</sub> N <sub>3</sub> O <sub>9</sub> | 2-amino-5-({4-[(6,7-dimethoxy-2-methyl-1,2,3,4-tetrahydroisoquinolin-1-yl)methyl]-2-({6-methoxy-1-[(4-methoxyphenyl)methyl]-2-methyl-1,2,3,4-tetrahydroisoquinolin-7-yl}oxy)phenoxy}-5-oxopentanoic acid | InChI=1S/C43H51N3O9/c1-45-17-16-29-23-38(52-5)41(25-32(29)34(45)19-26-7-10-30(50-3)11-8-26)54-40-21-27(9-13-36(40)55-42(47)14-12-33(44)43(48)49)20-35-31-24-39(53-6)37(51-4)22-28(31)15-18-46(35)2/h7-11,13,21-25,33-35H,12,14-20,44H2,1-6H3,(H,48,49) | YAJQPCYSVBBD<br>NV-<br>UHFFFAOYSA-N |



| No. | ID code | Structural formula                                                                 | SMILES                                                                     | Molecular weight | Molecular formula                                             | IUPAC name                                                                                                                                            | InChI String                                                                                                                                                        | InChI Key                       |
|-----|---------|------------------------------------------------------------------------------------|----------------------------------------------------------------------------|------------------|---------------------------------------------------------------|-------------------------------------------------------------------------------------------------------------------------------------------------------|---------------------------------------------------------------------------------------------------------------------------------------------------------------------|---------------------------------|
| 117 | 5Ca2    | 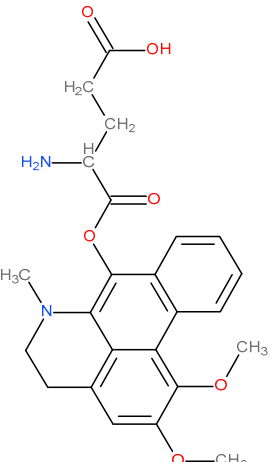  | <chem>COC1=CC2=C3C(N(C)CC2)=C(OC(=O)C(N)CCC(O)=O)C2=C(CC=C2)C3=C1OC</chem> | 438.48           | C <sub>24</sub> H <sub>26</sub> N <sub>2</sub> O <sub>6</sub> | 4-amino-5-({15,16-dimethoxy-10-methyl-10-azatetracyclo[7,7,1,0,2,7,0,13,17]heptadeca-1(16),2(7),3,5,8,13(17),14-heptaen-8-yl}oxy)-5-oxopentanoic acid | InChI=1S/C24H26N2O6/c1-26-11-10-13-12-17(30-2)23(31-3)20-14-6-4-5-7-15(14)22(21(26)19(13)20)32-24(29)16(25)8-9-18(27)28/h4-7,12,16H,8-11,25H2,1-3H3,(H,27,28)       | JTIAHINYCCSWP<br>N-UHFFFAOYSA-N |
| 118 | 5Da1    |  | <chem>NC(CCC(=O)OC1CC2CCN3CC4=CC5=C(CO)CO5)C=C4C(C23)C1OC(O)=O</chem>      | 418.446          | C <sub>21</sub> H <sub>26</sub> N <sub>2</sub> O <sub>7</sub> | 2-amino-5-({18-hydroxy-5,7-dioxo-12-azapentacyclo[10,6,1,0,2,10,4,8,0,15,19]nonadeca-2,4(8),9-trien-17-yl}oxy)-5-oxopentanoic acid                    | InChI=1S/C21H26N2O7/c22-13(21(26)27)1-2-17(24)30-16-5-10-3-4-23-8-11-6-14-15(29-9-28-14)7-12(11)18(19(10)23)20(16)25/h6-7,10,13,16,18-20,25H,1-5,8-9,22H2,(H,26,27) | ATUFDEQMZSWI<br>BL-UHFFFAOYSA-N |

| No. | ID code | Structural formula | SMILES                                                                                    | Molecular weight | Molecular formula                                              | IUPAC name                                                                                                                                                                                                                   | InChI String                                                                                                                                                                                                  | InChI Key                           |
|-----|---------|--------------------|-------------------------------------------------------------------------------------------|------------------|----------------------------------------------------------------|------------------------------------------------------------------------------------------------------------------------------------------------------------------------------------------------------------------------------|---------------------------------------------------------------------------------------------------------------------------------------------------------------------------------------------------------------|-------------------------------------|
| 119 | 5Da2    |                    | <chem>NC(CCC(=O)OC1C(O)CC2CCN3CC4=CC5=C(C(OCO5)C=C4C1C23)C(O)=O</chem>                    | 418.446          | C <sub>21</sub> H <sub>26</sub> N <sub>2</sub> O <sub>7</sub>  | 2-amino-5-({17-hydroxy-5,7-dioxa-12-azapentacyclo[10,6,1,02,10,04,8,015,19]nonadeca-2,4(8),9-trien-18-yl}oxy)-5-oxopentanoic acid                                                                                            | InChI=1S/C21H26N2O7/c22-13(21(26)27)1-2-17(25)30-20-14(24)5-10-3-4-23-8-11-6-15-16(29-9-28-15)7-12(11)18(20)19(10)23/h6-7,10,13-14,18-20,24H,1-5,8-9,22H2,(H,26,27)                                           | NRUIPOVJHZPO<br>OM-<br>UHFFFAOYSA-N |
| 120 | 5Da3    |                    | <chem>NC(CCC(=O)OC1CC2CCN3CC4=CC5=C(C(OCO5)C=C4C(C23)C1O)C(=O)CCCC(N)C(O)=O)C(O)=O</chem> | 547.561          | C <sub>26</sub> H <sub>33</sub> N <sub>3</sub> O <sub>10</sub> | 2-amino-5-({17-[(4-amino-4-carboxybutanoyl)oxy]-5,7-dioxa-12-azapentacyclo[10,6,1,02,10,04,8,015,19]nonadeca-2,4(8),9-trien-18-yl}oxy)-5-oxopentanoic acid                                                                   | InChI=1S/C26H33N3O10/c27-15(25(32)33)1-3-20(30)38-19-7-12-5-6-29-10-13-8-17-18(37-11-36-17)9-14(13)22(23(12)29)24(19)39-21(31)4-2-16(28)26(34)35/h8-9,12,15-16,19,22-24H,1-7,10-11,27-28H2,(H,32,33)(H,34,35) | XKANBAKCPFU<br>GAT-<br>UHFFFAOYSA-N |
| 121 | 5Ea1    |                    | <chem>NC(CCC(=O)OC1C=C2CC[N+]3=CC4=CC5=C(C(OCO5)C=C4C(C23)C1O)C(O)=O</chem>               | 415.422          | C <sub>21</sub> H <sub>23</sub> N <sub>2</sub> O <sub>7</sub>  | 17-[(4-amino-4-carboxybutanoyl)oxy]-18-hydroxy-5,7-dioxa-12λ <sup>5</sup> -azapentacyclo[10,6,1,0 <sup>2</sup> ,1 <sup>0</sup> ,4 <sup>8</sup> ,8 <sup>0</sup> ,15 <sup>15</sup> ,19]nonadeca-2,4(8),9,11,15-pentaen-12-ylum | InChI=1S/C21H22N2O7/c22-13(21(26)27)1-2-17(24)30-16-5-10-3-4-23-8-11-6-14-15(29-9-28-14)7-12(11)18(19(10)23)20(16)25/h5-8,13,16,18-20,25H,1-4,9,22H2/p+1                                                      | KFJAFKSOQSGA<br>CZ-<br>UHFFFAOYSA-O |

| No. | ID code | Structural formula                                                                 | SMILES                                                                                     | Molecular weight | Molecular formula                                              | IUPAC name                                                                                                                                                                                                                   | InChI String                                                                                                                                                                                              | InChI Key                   |
|-----|---------|------------------------------------------------------------------------------------|--------------------------------------------------------------------------------------------|------------------|----------------------------------------------------------------|------------------------------------------------------------------------------------------------------------------------------------------------------------------------------------------------------------------------------|-----------------------------------------------------------------------------------------------------------------------------------------------------------------------------------------------------------|-----------------------------|
| 122 | 5Ea2    | 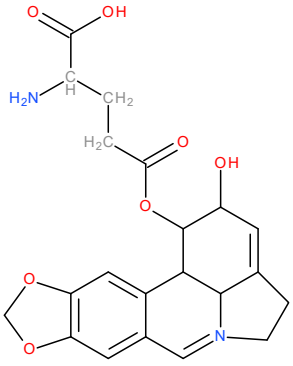  | <chem>NC(CCC(=O)OC1C(O)C=C2CC[N+]3=CC4=CC5=C(OCO5)C=C4C1C23)C(O)=O</chem>                  | 415.422          | C <sub>21</sub> H <sub>23</sub> N <sub>2</sub> O <sub>7</sub>  | 18-[(4-amino-4-carboxybutanoyl)oxy]-17-hydroxy-5,7-dioxalambda <sup>5</sup> -azapentacyclo[10,6,1,0 <sup>2</sup> ,1 <sup>0</sup> ,0 <sup>4</sup> ,8,0 <sup>15</sup> ,1 <sup>9</sup> ]nonadeca-2,4(8),9,11,15-pentaen-12-ylum | InChI=1S/C21H22N2O7/c22-13(21(26)27)1-2-17(25)30-20-14(24)5-10-3-4-23-8-11-6-15-16(29-9-28-15)7-12(11)18(20)19(10)23/h5-8,13-14,18-20,24H,1-4,9,22H2/p+1                                                  | KYHZOCWPALHCTN-UHFFFAOYSA-O |
| 123 | 5Ea3    |  | <chem>NC(CCC(=O)OC1C=C2CC[N+]3=CC4=CC5=C(OCO5)C=C4C(C23)C1OC(=O)CCC(N)C(O)=O)C(O)=O</chem> | 544.537          | C <sub>26</sub> H <sub>30</sub> N <sub>3</sub> O <sub>10</sub> | 17,18-bis[(4-amino-4-carboxybutanoyl)oxy]-5,7-dioxalambda <sup>5</sup> -azapentacyclo[10,6,1,0 <sup>2</sup> ,1 <sup>0</sup> ,0 <sup>4</sup> ,8,0 <sup>15</sup> ,1 <sup>9</sup> ]nonadeca-2,4(8),9,11,15-pentaen-12-ylum      | InChI=1S/C26H29N3O10/c27-15(25(32)33)1-3-20(30)38-19-7-12-5-6-29-10-13-8-17-18(37-11-36-17)9-14(13)22(23(12)29)24(19)39-21(31)4-2-16(28)26(34)35/h7-10,15-16,19,22-24H,1-6,11,27-28H2,(H-32,33,34,35)/p+1 | AKUOHJURJWGRBL-UHFFFAOYSA-O |



**Table S3.** Structural and physicochemical properties. Protonation and electric charge.

| ID code | Structural and physicochemical properties |     |               |    |                  |               |       |        | Protonation |           |           |      |              | Electric charge      |
|---------|-------------------------------------------|-----|---------------|----|------------------|---------------|-------|--------|-------------|-----------|-----------|------|--------------|----------------------|
|         | HA                                        | HAA | Fraction Csp3 | RB | H-bond acceptors | H-bond donors | MR    | TPSA   | Acidic pKa  | Basic pKa | pKa score | pI   | Microspecies | Molar polarizability |
| 1Aa1    | 10                                        | 0   | 0.6           | 4  | 5                | 2             | 31.91 | 89.62  | 1.87        | 8.6       | 8.6       | 5.23 | 3            | 12.92                |
| 1Aa2    | 10                                        | 0   | 0.6           | 4  | 5                | 2             | 31.91 | 89.62  | 3.48        | 7.48      | 7.48      | 5.47 | 3            | 12.92                |
| 1Aa3    | 11                                        | 0   | 0.67          | 5  | 5                | 2             | 36.72 | 89.62  | 2.01        | 8.6       | 8.6       | 5.31 | 3            | 14.73                |
| 1Aa4    | 11                                        | 0   | 0.67          | 5  | 5                | 2             | 36.72 | 89.62  | 3.61        | 7.48      | 7.48      | 5.55 | 3            | 14.73                |
| 1Aa5    | 11                                        | 0   | 0.67          | 5  | 5                | 2             | 36.72 | 89.62  | 2.02        | 9.51      | 9.51      | 5.77 | 3            | 14.73                |
| 1Aa6    | 11                                        | 0   | 0.67          | 5  | 5                | 2             | 36.72 | 89.62  | 3.93        | 7.41      | 7.41      | 5.56 | 3            | 14.73                |
| 1Aa7    | 12                                        | 0   | 0.71          | 6  | 5                | 2             | 41.53 | 89.62  | 2.13        | 9.51      | 9.51      | 5.83 | 3            | 16.54                |
| 1Aa8    | 12                                        | 0   | 0.71          | 6  | 5                | 2             | 41.53 | 89.62  | 4.04        | 7.41      | 7.41      | 5.64 | 3            | 16.54                |
| 1Ba1    | 10                                        | 0   | 0.6           | 4  | 4                | 3             | 33.54 | 106.41 | 2.15        | 9.31      | 9.31      | 5.73 | 4            | 13.32                |
| 1Ba2    | 10                                        | 0   | 0.6           | 4  | 3                | 3             | 34.67 | 112.2  | -1.63       | 8.23      | 8.23      | 12   | 3            | 13.96                |
| 1Ba3    | 10                                        | 0   | 0.6           | 4  | 4                | 3             | 33.54 | 106.41 | 4.06        | 15.94     | 8.46      | 6.12 | 4            | 13.32                |
| 1Ca1    | 10                                        | 0   | 0.6           | 4  | 4                | 2             | 35.62 | 80.39  | 1.46        | 9.11      | 9.11      | 5.29 | 3            | 14.11                |
| 1Ca2    | 10                                        | 0   | 0.6           | 4  | 3                | 1             | 38.85 | 60.16  | -           | 6.41      | 6.41      | -    | 2            | 15.54                |
| 1Ca3    | 10                                        | 0   | 0.6           | 4  | 4                | 2             | 35.62 | 80.39  | 3.36        | 6.83      | 6.83      | 5.01 | 3            | 14.11                |
| 1Da1    | 11                                        | 0   | 0.4           | 4  | 6                | 2             | 32.11 | 106.69 | 1.4         | 6.51      | 6.51      | 3.96 | 3            | 13.11                |
| 1Da2    | 13                                        | 0   | 0.57          | 6  | 6                | 2             | 41.73 | 106.69 | 1.79        | 9.51      | 9.51      | 5.64 | 3            | 16.71                |
| 1Da3    | 13                                        | 0   | 0.57          | 6  | 6                | 2             | 41.73 | 106.69 | 3.71        | 7.39      | 7.39      | 5.5  | 3            | 16.71                |
| 1Da4    | 9                                         | 0   | 0.6           | 0  | 4                | 1             | 28.23 | 69.39  | -           | 7.37      | 7.37      | -    | 2            | 11.68                |
| 2Aa1    | 13                                        | 0   | 0.57          | 6  | 5                | 3             | 42.31 | 103.7  | -1.8        | 15.41     | -1.8      | 0.78 | 6            | 16.13                |
| 2Ba1    | 11                                        | 0   | 0.67          | 5  | 5                | 3             | 37.3  | 86.63  | 1.58        | 10.62     | 10.62     | 2.73 | 5            | 14.49                |
| 2Ba2    | 12                                        | 0   | 0.71          | 5  | 5                | 2             | 42.2  | 77.84  | 1.4         | 10.27     | 10.27     | 2.71 | 5            | 16.31                |
| 2Ba3    | 13                                        | 0   | 0.75          | 5  | 4                | 2             | 46.49 | 74.6   | 3.01        | 4.19      | 0         | -    | 4            | 18.08                |
| 2Ba4    | 12                                        | 0   | 0.71          | 6  | 5                | 3             | 42.11 | 86.63  | 1.69        | 10.71     | 10.71     | 2.86 | 5            | 16.31                |
| 2Ba5    | 14                                        | 0   | 0.78          | 7  | 5                | 2             | 51.82 | 77.84  | 1.58        | 10.83     | 10.83     | 2.92 | 5            | 19.94                |

| ID code | Structural and physicochemical properties |     |               |    |                  |               |       |        | Protonation |           |           |      |              | Electric charge      |
|---------|-------------------------------------------|-----|---------------|----|------------------|---------------|-------|--------|-------------|-----------|-----------|------|--------------|----------------------|
|         | HA                                        | HAA | Fraction Csp3 | RB | H-bond acceptors | H-bond donors | MR    | TPSA   | Acidic pKa  | Basic pKa | pKa score | pI   | Microspecies | Molar polarizability |
| 2Ba6    | 13                                        | 0   | 0.75          | 6  | 5                | 2             | 47.01 | 77.84  | 1,5         | 10.55     | 10.55     | 2.83 | 5            | 18.12                |
| 2Ba6a   | 16                                        | 0   | 0.78          | 9  | 5                | 2             | 61.41 | 77.84  | 1,4         | 7.38      | 7.38      | 2.75 | 5            | 23.78                |
| 2Ca1    | 10                                        | 0   | 0.6           | 4  | 5                | 3             | 30.85 | 94.83  | 3,28        | 14.29     | -3.81     | -    | 5            | 11.9                 |
| 3Aa1    | 15                                        | 5   | 0.38          | 6  | 5                | 3             | 54.19 | 127.76 | 2,92        | 14        | 5.47      | 3.14 | 9            | 19.75                |
| 3Aa2    | 14                                        | 0   | 0.5           | 5  | 4                | 2             | 55.93 | 103.14 | 4,5         | 2.01      | 2.01      | 3.75 | 8            | 19.88                |
| 3Aa3    | 14                                        | 5   | 0.38          | 5  | 5                | 2             | 51.21 | 121.52 | 0,73        | 15.4      | 9.11      | 5.43 | 6            | 19.57                |
| 3Aa4    | 14                                        | 0   | 0.5           | 5  | 4                | 2             | 57.06 | 108.93 | 2,07        | 9.31      | 9.31      | 5.68 | 3            | 20.89                |
| 3Aa5    | 14                                        | 5   | 0.38          | 5  | 5                | 2             | 51.21 | 121.52 | 3,45        | 7.36      | 7.36      | 5.37 | 5            | 19.56                |
| 3Aa6    | 14                                        | 0   | 0.5           | 5  | 4                | 2             | 57.06 | 108.93 | 3,98        | 8.43      | 8.43      | 6.16 | 3            | 20.89                |
| 3Aa7    | 13                                        | 5   | 0.38          | 1  | 3                | 0             | 51.96 | 78.51  | -           | -0.7      | -0.7      | -    | 2            | 17.98                |
| 3Aa8    | 13                                        | 5   | 0.38          | 1  | 3                | 1             | 51.31 | 87.3   | 11,7        | 2.26      | 2.26      | 6.98 | 3            | 17.98                |
| 3Aa9    | 13                                        | 0   | 0.5           | 1  | 3                | 0             | 51.76 | 71.91  | -           | 3.61      | 3.61      | -    | 2            | 18.9                 |
| 3Ab10   | 14                                        | 5   | 0.38          | 2  | 4                | 1             | 50.02 | 96.53  | 15,72       | 2.33      | 2.33      | 9.02 | 3            | 18.74                |
| 3Ba1    | 15                                        | 5   | 0.38          | 6  | 6                | 3             | 48.58 | 112.66 | 3,47        | 13.77     | 1.68      | 2.51 | 9            | 18                   |
| 3Ba2    | 14                                        | 5   | 0.38          | 5  | 6                | 2             | 45.6  | 106.42 | -0,71       | 15.08     | 9.11      | 5.36 | 6            | 17.79                |
| 3Ba3    | 14                                        | 5   | 0.38          | 5  | 6                | 2             | 45.6  | 106.42 | -0,94       | 7.26      | 7.26      | 5.35 | 4            | 17.78                |
| 3Ba4    | 15                                        | 5   | 0.43          | 5  | 7                | 2             | 48.5  | 131.87 | 1,15        | 8.69      | 8.69      | 4.93 | 4            | 20.14                |
| 3Ba5    | 13                                        | 0   | 0.5           | 1  | 3                | 1             | 50.88 | 58.64  | -           | 11.61     | 3.12      | 7.38 | 2            | 16.98                |
| 3Ba6    | 13                                        | 5   | 0.38          | 1  | 4                | 0             | 46.35 | 63.41  | -           | -         | -2.46     | -    | 1            | 16.2                 |
| 3Bb7    | 13                                        | 0   | 0.5           | 1  | 4                | 0             | 45.25 | 55.84  | -           | -         | 2.23      | -    | -            | 16.58                |
| 3Bb8    | 14                                        | 5   | 0.38          | 2  | 5                | 1             | 44.41 | 81.43  | -0,01       | 13.52     | -0.01     | 6.75 | 3            | 16.97                |
| 4Aa1    | 22                                        | 6   | 0.47          | 10 | 4                | 2             | 87.59 | 77.84  | 3,94        | 1.67      | 1.67      | 2.74 | 8            | 32.85                |
| 4Aa2    | 21                                        | 6   | 0.53          | 10 | 3                | 2             | 88.53 | 66.56  | 1,5         | 9.53      | 9.53      | 6.07 | 5            | 33.68                |
| 4Aa3    | 15                                        | 0   | 0.89          | 9  | 4                | 2             | 62.34 | 66.56  | 2,41        | 9.53      | 9.53      | 8.11 | 5            | 24.62                |
| 4Ab1    | 15                                        | 0   | 0.5           | 7  | 7                | 3             | 45.43 | 150.36 | 3,02        | 14.36     | -5.57     | -    | 5            | 16.76                |

| ID code | Structural and physicochemical properties |     |               |    |                  |               |       |        | Protonation |           |           |      |              | Electric charge      |
|---------|-------------------------------------------|-----|---------------|----|------------------|---------------|-------|--------|-------------|-----------|-----------|------|--------------|----------------------|
|         | HA                                        | HAA | Fraction Csp3 | RB | H-bond acceptors | H-bond donors | MR    | TPSA   | Acidic pKa  | Basic pKa | pKa score | pI   | Microspecies | Molar polarizability |
| 4Ab2    | 12                                        | 0   | 0.6           | 6  | 6                | 3             | 38.37 | 121.85 | 1.65        | 11.05     | 9.3       | 5.48 | 5            | 14.53                |
| 4Ac1    | 12                                        | 0   | 0.67          | 6  | 6                | 4             | 40.1  | 98.66  | -0.69       | 9.07      | 9.07      | 2.02 | 11           | 15.84                |
| 4Ad1    | 14                                        | 0   | 1             | 6  | 7                | 1             | 48.95 | 129.52 | -           | 5.15      | 5.15      | -    | 2            | 21.5                 |
| 4Ad2    | 14                                        | 0   | 1             | 6  | 7                | 1             | 48.95 | 129.52 | -           | 8.5       | 8.5       | -    | 2            | 21.5                 |
| 4Ad3    | 16                                        | 0   | 1             | 8  | 7                | 1             | 58.57 | 129.52 | -           | 9.47      | 9.47      | -    | 2            | 25.11                |
| 4Ae1    | 12                                        | 0   | 0.6           | 0  | 6                | 2             | 36.06 | 59.08  | 0.25        | 3.55      | 3.55      | -    | 3            | 22.12                |
| 4Ae2    | 12                                        | 0   | 0.6           | 0  | 6                | 2             | 33.69 | 59.08  | 0.24        | 3.55      | 3.55      | -    | 3            | 21.47                |
| 4Ba1    | 12                                        | 0   | 0.4           | 6  | 7                | 2             | 33.59 | 115.92 | 1.27        | 6.52      | 6.52      | 3.91 | 3            | 13.9                 |
| 4Ba2    | 13                                        | 0   | 0.5           | 6  | 7                | 2             | 38.01 | 115.92 | 1.42        | 6.52      | 6.52      | 3.97 | 3            | 15.69                |
| 4Ba3    | 10                                        | 0   | 0.6           | 5  | 5                | 1             | 31.43 | 78.62  | -           | 7.09      | 7.09      | -    | 2            | 13.15                |
| 4Ba4    | 14                                        | 0   | 0.57          | 8  | 7                | 2             | 43.2  | 115.92 | 1.66        | 9.51      | 9.51      | 5.57 | 3            | 17.48                |
| 4Ba5    | 15                                        | 0   | 0.62          | 8  | 7                | 2             | 47.62 | 115.92 | 1.54        | 9.51      | 9.51      | 5.52 | 3            | 19.29                |
| 4Ba6    | 15                                        | 0   | 0.5           | 5  | 6                | 0             | 49.01 | 89.98  | -           | -         | -6.89     | -    | -            | 17.88                |
| 4Ba7    | 15                                        | 0   | 0.56          | 4  | 5                | 0             | 51.96 | 80.75  | -           | 14.91     | -7.02     | -    | 2            | 18.91                |
| 4Ca1    | 10                                        | 0   | 0.6           | 4  | 4                | 4             | 35.04 | 93.41  | 3.78        | 5.97      | 10.06     | 7.9  | 5            | 13.09                |
| 4Ca2    | 10                                        | 0   | 0.6           | 5  | 4                | 4             | 35.04 | 93.41  | 4           | 5.97      | 10.06     | 8.08 | 5            | 13.09                |
| 4Ca3    | 10                                        | 0   | 0.6           | 4  | 4                | 3             | 31.65 | 86.63  | 3.95        | 0.34      | -5.48     | -    | 7            | 12.51                |
| 4Ca4    | 10                                        | 0   | 0.6           | 5  | 4                | 3             | 31.65 | 86.63  | 4           | 0.43      | -5.46     | -    | 7            | 12.51                |
| 4Cb1    | 10                                        | 0   | 0.6           | 3  | 4                | 4             | 32.93 | 93.41  | 3.47        | 11.39     | 9.92      | 7.57 | 5            | 12.4                 |
| 4Cb2    | 11                                        | 0   | 0.6           | 3  | 5                | 5             | 35.67 | 119.43 | 1.59        | 27.64     | 9.52      | 8.45 | 8            | 13.92                |
| 4Cb3    | 11                                        | 0   | 0.6           | 4  | 5                | 5             | 39.65 | 115.35 | 2.48        | 11.38     | 9.65      | 7.39 | 9            | 13.92                |
| 4Cb4    | 11                                        | 0   | 0.6           | 3  | 5                | 4             | 39.74 | 96.42  | 3.6         | 10.05     | 8.15      | 6.95 | 5            | 13.92                |
| 4Cb5    | 11                                        | 0   | 0.67          | 3  | 4                | 4             | 37.74 | 93.41  | 3.84        | 11.54     | 9.98      | 7.84 | 5            | 14.2                 |
| 4Cb6    | 12                                        | 0   | 0.67          | 3  | 5                | 5             | 40.48 | 119.43 | 1.94        | 11.5      | 9.96      | 10.2 | 7            | 15.73                |
| 4Cb7    | 11                                        | 0   | 0.6           | 3  | 5                | 5             | 39.65 | 105.44 | 2.32        | 10.38     | 8.56      | 9.37 | 9            | 13.92                |

| ID code | Structural and physicochemical properties |     |               |    |                  |               |       |        | Protonation |           |           |      |              | Electric charge      |
|---------|-------------------------------------------|-----|---------------|----|------------------|---------------|-------|--------|-------------|-----------|-----------|------|--------------|----------------------|
|         | HA                                        | HAA | Fraction Csp3 | RB | H-bond acceptors | H-bond donors | MR    | TPSA   | Acidic pKa  | Basic pKa | pKa score | pI   | Microspecies | Molar polarizability |
| 4Da1    | 11                                        | 0   | 0.6           | 4  | 5                | 3             | 42.5  | 136.33 | 1.44        | 9.48      | 9.48      | 6.9  | 5            | 16.44                |
| 4Da2    | 11                                        | 0   | 0.8           | 4  | 5                | 3             | 41.24 | 136.33 | 1.89        | 9.32      | 9.32      | 5.88 | 7            | 16.92                |
| 4Da3    | 11                                        | 0   | 0.8           | 4  | 5                | 3             | 41.24 | 136.33 | 1.89        | 9.39      | 9.39      | 5.92 | 7            | 16.92                |
| 4Da4    | 12                                        | 0   | 0.8           | 5  | 6                | 4             | 43.87 | 132.85 | -1.94       | 9.53      | 9.53      | 4.12 | 5            | 17.45                |
| 4Da5    | 12                                        | 0   | 0.8           | 4  | 6                | 4             | 43.87 | 132.85 | -1.97       | 9.51      | 9.51      | 4.11 | 5            | 17.45                |
| 4Da6    | 12                                        | 0   | 0.8           | 4  | 6                | 4             | 43.87 | 132.85 | -1.96       | 9.58      | 9.58      | 4.12 | 5            | 17.45                |
| 4Da7    | 11                                        | 0   | 0.8           | 2  | 5                | 3             | 40.22 | 112.62 | 1.52        | 7.72      | 7.72      | 5    | 5            | 16.22                |
| 4Da8    | 11                                        | 0   | 0.8           | 2  | 5                | 2             | 44.29 | 89.61  | 3.53        | 2.92      | 2.92      | 3.18 | 4            | 16.22                |
| 4Da9    | 11                                        | 0   | 0.8           | 2  | 5                | 3             | 44.23 | 108.54 | 3.51        | 2.9       | 2.9       | 3.15 | 8            | 16.22                |
| 4Da10   | 12                                        | 0   | 0.83          | 2  | 5                | 3             | 45.03 | 112.62 | 1.77        | 9.1       | 9.1       | 6.06 | 5            | 18.03                |
| 4Da11   | 11                                        | 0   | 0.8           | 2  | 5                | 3             | 44.19 | 98.63  | 2.5         | 5.87      | 5.87      | 4.68 | 7            | 16.22                |
| 4Db1    | 11                                        | 0   | 0.8           | 4  | 5                | 3             | 42.69 | 120.01 | 2.13        | 6.41      | 6.41      | 1.76 | 6            | 15.22                |
| 4Db2    | 11                                        | 0   | 0.8           | 2  | 5                | 3             | 38.38 | 110.43 | 1.49        | 9.58      | 9.58      | 1.97 | 5            | 15.22                |
| 4Db3    | 11                                        | 0   | 0.8           | 2  | 5                | 3             | 42.35 | 96.44  | -0.33       | 9.24      | 9.24      | 0.8  | 4            | 15.22                |
| 4Db4    | 12                                        | 0   | 0.83          | 2  | 5                | 3             | 43.18 | 110.43 | 1.75        | 9.58      | 9.58      | 2.17 | 5            | 17.02                |
| 4Db5    | 12                                        | 0   | 0.83          | 2  | 5                | 3             | 47.16 | 96.44  | 1.25        | 12        | 12        | 2.52 | 5            | 17.02                |
| 4Db6    | 13                                        | 0   | 0.86          | 2  | 5                | 3             | 51.96 | 96.44  | 1.62        | 10.42     | 10.42     | 2.01 | 5            | 18.83                |
| 4Dc1    | 14                                        | 0   | 1             | 6  | 7                | 5             | 50.83 | 160.7  | -0.25       | 10.24     | 10.24     | 1.26 | 11           | 20.24                |
| 4Dc2    | 14                                        | 0   | 1             | 6  | 7                | 5             | 50.83 | 160.7  | 1.34        | 10.71     | 10.71     | 1.63 | 11           | 20.24                |
| 4Dc3    | 14                                        | 0   | 1             | 6  | 7                | 5             | 50.83 | 160.7  | 1.49        | 10.49     | 10.49     | 1.66 | 8            | 20.24                |
| 4Dc4    | 12                                        | 0   | 1             | 4  | 5                | 3             | 48.51 | 120.24 | 0.02        | 9.94      | 9.94      | 1.36 | 5            | 19.13                |
| 4Dc5    | 12                                        | 0   | 1             | 4  | 5                | 3             | 48.51 | 120.24 | 1.39        | 10.79     | 10.79     | 1.72 | 4            | 19.13                |
| 4Dc6    | 17                                        | 0   | 0.8           | 5  | 10               | 7             | 53.33 | 210.03 | -0.01       | 28.81     | 8.81      | 0.75 | 17           | 21.87                |
| 4Dc7    | 17                                        | 0   | 0.8           | 5  | 10               | 7             | 57.3  | 196.04 | 0.93        | 7.03      | 7.03      | 1.31 | 16           | 21.87                |
| 4Dc8    | 15                                        | 0   | 1             | 4  | 8                | 6             | 55.53 | 158.74 | 0.94        | 9.23      | 9.23      | 2.54 | 11           | 21.07                |

| ID code | Structural and physicochemical properties |     |               |    |                  |               |        |        | Protonation |           |           |      |              | Electric charge      |
|---------|-------------------------------------------|-----|---------------|----|------------------|---------------|--------|--------|-------------|-----------|-----------|------|--------------|----------------------|
|         | HA                                        | HAA | Fraction Csp3 | RB | H-bond acceptors | H-bond donors | MR     | TPSA   | Acidic pKa  | Basic pKa | pKa score | pI   | Microspecies | Molar polarizability |
| 4Dd1.1  | 10                                        | 0   | 0.8           | 5  | 5                | 4             | 34.16  | 95.58  | 2.35        | 9.53      | 9.53      | 7.29 | 5            | 14.21                |
| 4Dd1.2  | 10                                        | 0   | 0.8           | 3  | 5                | 4             | 32.08  | 95.58  | 2.02        | 8.76      | 8.76      | 6.21 | 5            | 13.51                |
| 4Dd1.3  | 10                                        | 0   | 0.8           | 2  | 5                | 4             | 32.08  | 95.58  | 1.35        | 15.63     | 8.47      | 5.46 | 6            | 13.51                |
| 4Dd1.4  | 10                                        | 0   | 0.8           | 3  | 5                | 4             | 36.05  | 81.59  | 1.6         | 9.97      | 9.97      | 6.5  | 5            | 13.51                |
| 4Dd2.1  | 12                                        | 0   | 0.8           | 6  | 6                | 3             | 38.99  | 116.22 | -0.81       | 13.62     | 9.53      | 5.67 | 6            | 15.31                |
| 4Dd3.1  | 9                                         | 0   | 0.8           | 1  | 4                | 2             | 29.6   | 72.55  | 3.22        | 9.64      | 9.64      | 6.39 | 3            | 12.05                |
| 4Dd4.1  | 21                                        | 0   | 0.75          | 9  | 7                | 6             | 74.44  | 161.98 | 3.38        | 14.92     | 8.44      | 5.92 | 15           | 28.04                |
| 4Dd4.2  | 22                                        | 0   | 0.77          | 10 | 7                | 6             | 79.25  | 161.98 | 3.48        | 15.64     | 8.44      | 5.97 | 13           | 29.85                |
| 4Dd4.3  | 23                                        | 0   | 0.69          | 11 | 8                | 6             | 79.86  | 179.05 | 3.18        | 13.63     | 8.44      | 3.61 | 12           | 29.85                |
| 4Dd4.m  | 14                                        | 0   | 0.75          | 5  | 5                | 4             | 51.05  | 112.65 | 2.07        | 12.05     | 9.52      | 5.8  | 7            | 18.76                |
| 5Aa1    | 35                                        | 13  | 0.4           | 10 | 10               | 3             | 127.12 | 140.62 | 0.99        | 10.11     | 10.11     | 2.4  | 5            | 48.58                |
| 5Aa2    | 33                                        | 13  | 0.4           | 5  | 7                | 0             | 125.87 | 91.37  | -           | -         | -4.22     | -    | -            | 46.6                 |
| 5Aa3    | 38                                        | 6   | 0.44          | 12 | 10               | 3             | 137.75 | 155.64 | -1.16       | 15.1      | 9.51      | 5.61 | 6            | 53.72                |
| 5Aa4    | 38                                        | 6   | 0.44          | 12 | 10               | 3             | 137.75 | 155.64 | -1.16       | 15.16     | 7.41      | 5.54 | 5            | 53.72                |
| 5Ba1    | 55                                        | 24  | 0.4           | 16 | 12               | 2             | 216.4  | 142.25 | 1.33        | 9.54      | 9.54      | 8.95 | 9            | 81.6                 |
| 5Ba2    | 55                                        | 24  | 0.4           | 16 | 12               | 2             | 216.4  | 142.25 | 3.14        | 8.44      | 8.44      | 8.1  | 9            | 81.6                 |
| 5Ca1    | 32                                        | 14  | 0.33          | 8  | 7                | 2             | 124.83 | 111.32 | 1.4         | 9.51      | 9.51      | 5.9  | 5            | 48.21                |
| 5Ca2    | 32                                        | 14  | 0.33          | 8  | 7                | 2             | 124.83 | 111.32 | 3.8         | 7.25      | 7.25      | 5.55 | 5            | 48.21                |
| 5Da1    | 30                                        | 6   | 0.62          | 6  | 9                | 3             | 107.52 | 131.55 | 1.79        | 13.78     | 9.72      | 9.3  | 6            | 41.44                |
| 5Da2    | 30                                        | 6   | 0.62          | 6  | 9                | 3             | 107.52 | 131.55 | 1.72        | 14.14     | 9.64      | 9.22 | 6            | 41.44                |
| 5Da3    | 39                                        | 6   | 0.62          | 12 | 13               | 4             | 136.15 | 200.94 | 1.4         | 9.94      | 9.94      | 9.15 | 11           | 52.94                |
| 5Ea1    | 30                                        | 6   | 0.48          | 6  | 8                | 3             | 108.3  | 131.32 | 1.72        | 13.53     | 9.51      | 11.5 | 4            | 40.68                |
| 5Ea2    | 30                                        | 6   | 0.48          | 6  | 8                | 3             | 108.3  | 131.32 | 1.66        | 13.73     | 9.51      | 11.6 | 4            | 40.68                |
| 5Ea3    | 39                                        | 6   | 0.5           | 12 | 12               | 4             | 136.94 | 200.71 | 1.34        | 9.81      | 9.81      | 9.51 | 7            | 52.18                |

**Table S4.** Water solubility.

Two topological methods for predicting aqueous solubility have been developed, one of them being implemented after ESOL (*Delaney JS. (2004)*) [23] and the other being taken from *Ali J. et al. (2012)* [24]. The two methods differ in the general solubility equation, but both exclude the melting point and show a linear correlation between the predicted and the experimental values ( $R^2=0,69$ , respectively  $0,81$ ). Another method was developed by SILICOS-IT (fragmentary method calculated using FILTER-IT 1.0.2 program), whose correlation coefficient was corrected by the molecular weight and ( $R^2=0,75$ ). All three methods calculate the decimal logarithm of molar water solubility (logS), but the results can be expressed in mol/l și mg/ml [11].

| No. | ID code | logS<br>AquaSol | ESOL<br>Log S | ESOL<br>Solub.<br>(mg/ml) | ESOL<br>Solub.<br>(mol/l) | ESOL<br>Class | Ali<br>Log S | Ali Sol<br>(mg/ml) | Ali Sol<br>(mol/l) | Ali<br>Class | Silicos-<br>IT<br>LogSw | Silicos-<br>IT Sol.<br>(mg/ml) | Silicos-<br>IT Sol.<br>(mol/l) | Silicos-<br>IT<br>class |
|-----|---------|-----------------|---------------|---------------------------|---------------------------|---------------|--------------|--------------------|--------------------|--------------|-------------------------|--------------------------------|--------------------------------|-------------------------|
| 1   | 1Aa1    | -0.19           | 1.04          | 1620                      | 11                        | H             | 1.09         | 1800               | 12.3               | H            | 0.6                     | 580                            | 3.94                           | S                       |
| 2   | 1Aa2    | -0.06           | 1.74          | 8120                      | 55.2                      | H             | 2.24         | 25600              | 174                | H            | 0.6                     | 580                            | 3.94                           | S                       |
| 3   | 1Aa3    | -0.37           | 0.79          | 1010                      | 6.24                      | H             | 0.71         | 836                | 5.19               | H            | 0.18                    | 244                            | 1.52                           | S                       |
| 4   | 1Aa4    | -0.25           | 1.49          | 4960                      | 30.8                      | H             | 1.86         | 11600              | 71.8               | H            | 0.18                    | 244                            | 1.52                           | S                       |
| 5   | 1Aa5    | -0.44           | 1.61          | 6530                      | 40.5                      | H             | 2.05         | 18200              | 113                | H            | 0.18                    | 244                            | 1.52                           | S                       |
| 6   | 1Aa6    | -0.31           | 1.61          | 6530                      | 40.5                      | H             | 2.05         | 18200              | 113                | H            | 0.18                    | 244                            | 1.52                           | S                       |
| 7   | 1Aa7    | -0.63           | 1.36          | 4010                      | 22.9                      | H             | 1.68         | 8380               | 47.8               | H            | -0.23                   | 103                            | 0.59                           | S                       |
| 8   | 1Aa8    | -0.5            | 1.25          | 3090                      | 17.6                      | H             | 1.49         | 5450               | 31.1               | H            | -0.23                   | 103                            | 0.59                           | S                       |
| 9   | 1Ba1    | -0.51           | 1.5           | 4650                      | 31.8                      | H             | 1.48         | 4440               | 30.4               | H            | 0.68                    | 698                            | 4.78                           | S                       |
| 10  | 1Ba2    | -0.75           | 0.48          | 440                       | 3.03                      | H             | -0.33        | 67.9               | 0.47               | V            | 0.46                    | 423                            | 2.91                           | S                       |
| 11  | 1Ba3    | -0.51           | 2.25          | 26100                     | 179                       | H             | 2.72         | 76300              | 522                | H            | 0.68                    | 698                            | 4.78                           | S                       |
| 12  | 1Ca1    | -1.36           | 1.1           | 2110                      | 12.7                      | H             | 1.57         | 6190               | 37.4               | H            | -0.31                   | 81.1                           | 0.49                           | S                       |
| 13  | 1Ca2    | -1.54           | -1.18         | 12.1                      | 0.07                      | V             | -1.58        | 4.81               | 0.03               | V            | -1.51                   | 5.7                            | 0.03                           | S                       |
| 14  | 1Ca3    | -0.78           | 1.1           | 2110                      | 12.7                      | H             | 1.57         | 6190               | 37.4               | H            | -0.31                   | 81.1                           | 0.49                           | S                       |
| 15  | 1Da1    | -0.89           | 1.63          | 6870                      | 42.7                      | H             | 1.84         | 11200              | 69.2               | H            | 1.04                    | 1770                           | 11                             | S                       |
| 16  | 1Da2    | -0.96           | 1.64          | 8230                      | 43.5                      | H             | 1.92         | 15900              | 83.8               | H            | 0.22                    | 313                            | 1.66                           | S                       |
| 17  | 1Da3    | -0.84           | 1.53          | 6340                      | 33.5                      | H             | 1.74         | 10300              | 54.5               | H            | 0.22                    | 313                            | 1.66                           | S                       |
| 18  | 1Da4    | -0.1            | -0.07         | 111                       | 0.86                      | V             | -0.06        | 111                | 0.86               | V            | -0.16                   | 89.7                           | 0.7                            | S                       |

| No. | ID code | logS<br>AquaSol | ESOL<br>Log S | ESOL<br>Solub.<br>(mg/ml) | ESOL<br>Solub.<br>(mol/l) | ESOL<br>Class | Ali<br>Log S | Ali Sol<br>(mg/ml) | Ali Sol<br>(mol/l) | Ali<br>Class | Silicos-<br>IT<br>LogSw | Silicos-<br>IT Sol.<br>(mg/ml) | Silicos-<br>IT Sol.<br>(mol/l) | Silicos-<br>IT<br>class |
|-----|---------|-----------------|---------------|---------------------------|---------------------------|---------------|--------------|--------------------|--------------------|--------------|-------------------------|--------------------------------|--------------------------------|-------------------------|
| 19  | 2Aa1    | -0.9            | 0.53          | 641                       | 3.39                      | H             | 0.16         | 273                | 1.44               | H            | 0.12                    | 252                            | 1.33                           | S                       |
| 20  | 2Ba1    | -0.33           | 1.38          | 3870                      | 24                        | H             | 1.74         | 8910               | 55.3               | H            | 0.09                    | 196                            | 1.22                           | S                       |
| 21  | 2Ba2    | -0.35           | 1             | 1740                      | 9.95                      | H             | 1.44         | 4820               | 27.5               | H            | 0.41                    | 446                            | 2.55                           | S                       |
| 22  | 2Ba3    | -0.2            | -0.54         | 55.1                      | 0.29                      | V             | -0.87        | 25.7               | 0.14               | V            | -0.7                    | 37.5                           | 0.2                            | S                       |
| 23  | 2Ba4    | -0.45           | 1.13          | 2350                      | 13.4                      | H             | 1.36         | 4000               | 22.8               | H            | -0.33                   | 82.7                           | 0.47                           | S                       |
| 24  | 2Ba5    | -0.72           | 0.5           | 637                       | 3.13                      | H             | 0.68         | 977                | 4.81               | H            | -0.41                   | 78.7                           | 0.39                           | S                       |
| 25  | 2Ba6    | -0.44           | 0.75          | 1060                      | 5.62                      | H             | 1.07         | 2200               | 11.6               | H            | 0                       | 187                            | 0.99                           | S                       |
| 26  | 2Ba6a   | -1.73           | -0.08         | 225                       | 0.83                      | V             | 0.22         | 44                 | 1.64               | H            | -1.67                   | 5.76                           | 0.02                           | S                       |
| 27  | 2Ca1    | -0.05           | 0.12          | 194                       | 1.31                      | H             | -0.54        | 43.1               | 0.29               | V            | 1.11                    | 1900                           | 12.9                           | S                       |
| 28  | 3Aa1    | -1.92           | -1.59         | 5.91                      | 0.03                      | V             | -3.01        | 0.22               | 0                  | S            | -0.96                   | 25.3                           | 0.11                           | S                       |
| 29  | 3Aa2    | -1.36           | -1.17         | 14.8                      | 0.07                      | V             | -2.23        | 1.29               | 0.01               | S            | 0.7                     | 1080                           | 4.99                           | S                       |
| 30  | 3Aa3    | -1.56           | 0.37          | 497                       | 2.32                      | H             | 0.31         | 442                | 2.06               | H            | -1.12                   | 16.1                           | 0.08                           | S                       |
| 31  | 3Aa4    | -1.61           | 1.07          | 2540                      | 11.8                      | H             | 1.33         | 4580               | 21.2               | H            | 0.48                    | 656                            | 3.03                           | S                       |
| 32  | 3Aa5    | -1.52           | 0.37          | 497                       | 2.32                      | H             | 0.31         | 442                | 2.06               | H            | -1.12                   | 16.1                           | 0.08                           | S                       |
| 33  | 3Aa6    | -1.6            | 1.07          | 2540                      | 11.8                      | H             | 1.33         | 4580               | 21.2               | H            | 0.48                    | 656                            | 3.03                           | S                       |
| 34  | 3Aa7    | -2.08           | -1.55         | 5.58                      | 0.03                      | V             | -1.65        | 4.43               | 0.02               | V            | -1.8                    | 3.11                           | 0.02                           | S                       |
| 35  | 3Aa8    | -1.79           | -1.33         | 9.27                      | 0.05                      | V             | -1.47        | 6.69               | 0.03               | V            | -2.29                   | 1.02                           | 0.01                           | S                       |
| 36  | 3Aa9    | -1.45           | -1.52         | 6.02                      | 0.03                      | V             | -1.9         | 2.5                | 0.01               | V            | -0.37                   | 85                             | 0.43                           | S                       |
| 37  | 3Ab10   | -2.02           | -196          | 2.32                      | 0.01                      | V             | -2.69        | 0.44               | 0                  | S            | -2.03                   | 1.99                           | 0.01                           | S                       |
| 38  | 3Ba1    | -1.32           | -1.11         | 16.8                      | 0.08                      | V             | -2.06        | 1.86               | 0.01               | S            | -0.9                    | 26.8                           | 0.13                           | S                       |
| 39  | 3Ba2    | -1.1            | 0.86          | 1420                      | 7.17                      | H             | 1.28         | 3730               | 18.8               | H            | -1.06                   | 17.1                           | 0.09                           | S                       |
| 40  | 3Ba3    | -1.06           | 0.86          | 1420                      | 7.17                      | H             | 1.28         | 3730               | 18.8               | H            | -1.06                   | 17.1                           | 0.09                           | S                       |
| 41  | 3Ba4    | -1.12           | 0.89          | 1810                      | 7.74                      | H             | 1.14         | 3200               | 13.6               | H            | -1.04                   | 21.2                           | 0.09                           | S                       |
| 42  | 3Ba5    | -1.15           | -0.71         | 35.7                      | 0.2                       | V             | -0.46        | 63                 | 0.35               | V            | -0.31                   | 90.1                           | 0.49                           | S                       |
| 43  | 3Ba6    | -1.57           | -1.06         | 15.8                      | 0.09                      | V             | -0.69        | 37.2               | 0.21               | V            | -1.74                   | 3.29                           | 0.02                           | S                       |

| No. | ID code | logS<br>AquaSol | ESOL<br>Log S | ESOL<br>Solub.<br>(mg/ml) | ESOL<br>Solub.<br>(mol/l) | ESOL<br>Class | Ali<br>Log S | Ali Sol<br>(mg/ml) | Ali Sol<br>(mol/l) | Ali<br>Class | Silicos-<br>IT<br>LogSw | Silicos-<br>IT Sol.<br>(mg/ml) | Silicos-<br>IT Sol.<br>(mol/l) | Silicos-<br>IT<br>class |
|-----|---------|-----------------|---------------|---------------------------|---------------------------|---------------|--------------|--------------------|--------------------|--------------|-------------------------|--------------------------------|--------------------------------|-------------------------|
| 44  | 3Bb7    | -1.36           | -1.08         | 15.2                      | 0.08                      | V             | -1           | 18.1               | 0.1                | V            | 0.01                    | 185                            | 1.01                           | S                       |
| 45  | 3Bb8    | -1.59           | -1.48         | 6.52                      | 0.03                      | V             | -1.74        | 3.58               | 0.02               | V            | -1.97                   | 2.1                            | 0.01                           | S                       |
| 46  | 4Aa1    | -3.33           | -3.17         | 0.24                      | 0                         | S             | -3.86        | 0.05               | 0                  | S            | -4.15                   | 0.02                           | 0                              | M                       |
| 47  | 4Aa2    | -3.43           | -2.05         | 2.97                      | 0.01                      | S             | -1.92        | 3.97               | 0.01               | V            | -4.83                   | 0                              | 0                              | M                       |
| 48  | 4Aa3    | -1.59           | 0.58          | 971                       | 3.78                      | H             | 1.39         | 6250               | 24.3               | H            | -2.35                   | 1.15                           | 0                              | S                       |
| 49  | 4Ab1    | -1.98           | -0.04         | 201                       | 0.92                      | V             | -1.56        | 6.08               | 0.03               | V            | 1.63                    | 9310                           | 42.5                           | S                       |
| 50  | 4Ab2    | -1.42           | 2.14          | 23900                     | 136                       | H             | 2.28         | 33300              | 190                | H            | 0.3                     | 347                            | 1.98                           | S                       |
| 51  | 4Ac1    | -0.69           | 2.94          | 152000                    | 861                       | H             | 4.09         | 2190000            | 12400              | H            | 0.03                    | 187                            | 1.06                           | S                       |
| 52  | 4Ad1    | -1.15           | -0.13         | 185                       | 0,75                      | V             | -0.87        | 33.3               | 0.14               | V            | -0.49                   | 79.8                           | 0.32                           | S                       |
| 53  | 4Ad2    | -0.98           | 0.16          | 355                       | 1.43                      | H             | -0.4         | 97.7               | 0.4                | V            | -0.49                   | 79.8                           | 0.32                           | S                       |
| 54  | 4Ad3    | -1.37           | -0.33         | 128                       | 0.47                      | V             | -1.14        | 19.9               | 0.07               | V            | -1.29                   | 14                             | 0.05                           | S                       |
| 55  | 4Ae1    | -               | -1.27         | 19.1                      | 0.05                      | V             | 0.52         | 1180               | 3.28               | H            | -1.18                   | 23.9                           | 0.07                           | S                       |
| 56  | 4Ae2    | -               | -1.42         | 13.6                      | 0.04                      | V             | 0.26         | 644                | 1.8                | H            | -1.16                   | 24.8                           | 0.07                           | S                       |
| 57  | 4Ba1    | -0.97           | 1.52          | 5920                      | 33.4                      | H             | 1.42         | 4640               | 26.2               | H            | 1.27                    | 3340                           | 18.8                           | S                       |
| 58  | 4Ba2    | -0.93           | 1.44          | 5310                      | 27.8                      | H             | 1.43         | 5130               | 26.8               | H            | 0.88                    | 1460                           | 7.64                           | S                       |
| 59  | 4Ba3    | -0.2            | 0.09          | 180                       | 1.22                      | H             | -0.36        | 64                 | 0.44               | V            | -0.07                   | 124                            | 0.84                           | S                       |
| 60  | 4Ba4    | -1.19           | 1.53          | 7000                      | 34.1                      | H             | 1.5          | 6510               | 31.7               | H            | 0.46                    | 588                            | 2.86                           | S                       |
| 61  | 4Ba5    | -1.25           | 1.46          | 6300                      | 28.7                      | H             | 1.52         | 7290               | 33.3               | H            | 0.07                    | 257                            | 1.17                           | S                       |
| 62  | 4Ba6    | -1.78           | -0.65         | 48.3                      | 0.23                      | V             | -1.12        | 16.4               | 0.08               | V            | -0.17                   | 144                            | 0.67                           | S                       |
| 63  | 4Ba7    | -1.6            | -0.39         | 86.1                      | 0.4                       | V             | -0.42        | 81.7               | 0.38               | V            | -0.82                   | 32.3                           | 0.15                           | S                       |
| 64  | 4Ca1    | -0.74           | 0.06          | 168                       | 1.15                      | H             | -0.62        | 35                 | 0.24               | V            | 0.36                    | 332                            | 2.28                           | S                       |
| 65  | 4Ca2    | -0.75           | 0.26          | 265                       | 1.81                      | H             | -0.4         | 57.9               | 0.4                | V            | -0.02                   | 141                            | 0.96                           | S                       |
| 66  | 4Ca3    | -0.57           | 0.11          | 190                       | 1.29                      | H             | -0.38        | 60.7               | 0.41               | V            | 0.5                     | 466                            | 3.17                           | S                       |
| 67  | 4Ca4    | -0.6            | 0.31          | 299                       | 2.04                      | H             | -0.17        | 100                | 0.68               | V            | 0.13                    | 197                            | 1.34                           | S                       |
| 68  | 4Cb1    | -0.66           | 0.24          | 250                       | 1.74                      | H             | -0.24        | 83.6               | 0.58               | V            | 0.83                    | 977                            | 6.78                           | S                       |



| No. | ID code | logS<br>AquaSol | ESOL<br>Log S | ESOL<br>Solub.<br>(mg/ml) | ESOL<br>Solub.<br>(mol/l) | ESOL<br>Class | Ali<br>Log S | Ali Sol<br>(mg/ml) | Ali Sol<br>(mol/l) | Ali<br>Class | Silicos-<br>IT<br>LogSw | Silicos-<br>IT Sol.<br>(mg/ml) | Silicos-<br>IT Sol.<br>(mol/l) | Silicos-<br>IT<br>class |
|-----|---------|-----------------|---------------|---------------------------|---------------------------|---------------|--------------|--------------------|--------------------|--------------|-------------------------|--------------------------------|--------------------------------|-------------------------|
| 69  | 4Cb2    | -0.49           | 1.88          | 12000                     | 75.6                      | H             | 2.07         | 18700              | 118                | H            | 0.96                    | 1450                           | 9.1                            | S                       |
| 70  | 4Cb3    | -0.69           | 2.06          | 18500                     | 116                       | H             | 2.35         | 35900              | 226                | H            | 0.64                    | 698                            | 4.39                           | S                       |
| 71  | 4Cb4    | -0.83           | 1.66          | 7240                      | 45.5                      | H             | 2.19         | 24700              | 155                | H            | 1.37                    | 3770                           | 23.7                           | S                       |
| 72  | 4Cb5    | -0.82           | -0.07         | 133                       | 0.84                      | V             | -0.61        | 38.8               | 0.25               | V            | 0.54                    | 550                            | 3.48                           | S                       |
| 73  | 4Cb6    | -0.62           | 1.91          | 14100                     | 81.6                      | H             | 2.27         | 32100              | 185                | H            | 0.67                    | 814                            | 4.7                            | S                       |
| 74  | 4Cb7    | -0.76           | 1.73          | 8500                      | 53.4                      | H             | 2.12         | 20800              | 130                | H            | 0.77                    | 931                            | 5.85                           | S                       |
| 75  | 4Da1    | -0.86           | 1.8           | 11100                     | 62.4                      | H             | 1.66         | 8220               | 46.1               | H            | 0.14                    | 245                            | 1.37                           | S                       |
| 76  | 4Da2    | -0.74           | 1.01          | 1850                      | 10.3                      | H             | 0.39         | 438                | 2.44               | H            | 0.15                    | 254                            | 1.42                           | S                       |
| 77  | 4Da3    | -0.62           | 0.99          | 1750                      | 9.74                      | H             | 0.35         | 398                | 2.22               | H            | 0.15                    | 254                            | 1.42                           | S                       |
| 78  | 4Da4    | -0.88           | 1.35          | 4420                      | 22.5                      | H             | 1.08         | 2380               | 12.1               | H            | 0.34                    | 432                            | 2.2                            | S                       |
| 79  | 4Da5    | -0.85           | 0.72          | 1030                      | 5.24                      | H             | 0.15         | 277                | 1.41               | H            | 0.72                    | 1020                           | 5.21                           | S                       |
| 80  | 4Da6    | -0.75           | 0.72          | 1030                      | 5.24                      | H             | 0.15         | 277                | 1.41               | H            | 0.72                    | 1020                           | 5.21                           | S                       |
| 81  | 4Da7    | 0.03            | 0.53          | 602                       | 3.38                      | H             | 0.29         | 351                | 1.97               | H            | 0.06                    | 206                            | 1.15                           | S                       |
| 82  | 4Da8    | -0.48           | 0.31          | 368                       | 2.06                      | H             | 0.42         | 474                | 2.66               | H            | 0.48                    | 534                            | 3                              | S                       |
| 83  | 4Da9    | 0.06            | 0.49          | 552                       | 3.1                       | H             | 0.32         | 370                | 2.08               | H            | -0.46                   | 62.2                           | 0.35                           | S                       |
| 84  | 4Da10   | -0.05           | 0.57          | 711                       | 3.7                       | H             | 0.5          | 610                | 3.17               | H            | -0.22                   | 115                            | 0.6                            | S                       |
| 85  | 4Da11   | -0.47           | 0.38          | 432                       | 2.42                      | H             | 0.35         | 398                | 2.23               | H            | -0.13                   | 132                            | 0.74                           | S                       |
| 86  | 4Db1    | 0.05            | 1.84          | 12400                     | 69.2                      | H             | 2.09         | 22000              | 123                | H            | 0.35                    | 405                            | 2.26                           | S                       |
| 87  | 4Db2    | 0.41            | 1.78          | 10900                     | 60.7                      | H             | 2.42         | 46600              | 260                | H            | 0.69                    | 873                            | 4.88                           | S                       |
| 88  | 4Db3    | 0.32            | 1.64          | 7790                      | 43.5                      | H             | 2.47         | 52900              | 296                | H            | 0.5                     | 562                            | 3.14                           | S                       |
| 89  | 4Db4    | 0.16            | 1.82          | 12600                     | 65.5                      | H             | 2.61         | 79200              | 410                | H            | 0.4                     | 490                            | 2.54                           | S                       |
| 90  | 4Db5    | -0.01           | 1.61          | 7840                      | 40.6                      | H             | 2.56         | 70800              | 366                | H            | 0.21                    | 315                            | 1.63                           | S                       |
| 91  | 4Db6    | -0.28           | 1.3           | 4140                      | 20                        | H             | 2.2          | 32900              | 159                | H            | -0.07                   | 177                            | 0.85                           | S                       |
| 92  | 4Dc1    | -0.37           | 2.43          | 66800                     | 270                       | H             | 2.69         | 120000             | 488                | H            | 1.07                    | 2900                           | 11.7                           | S                       |
| 93  | 4Dc2    | -0.3            | 2.72          | 130000                    | 527                       | H             | 3.17         | 362000             | 1460               | H            | 1.07                    | 2900                           | 11.7                           | S                       |

| No. | ID code | logS<br>AquaSol | ESOL<br>Log S | ESOL<br>Solub.<br>(mg/ml) | ESOL<br>Solub.<br>(mol/l) | ESOL<br>Class | Ali<br>Log S | Ali Sol<br>(mg/ml) | Ali Sol<br>(mol/l) | Ali<br>Class | Silicos-<br>IT<br>LogSw | Silicos-<br>IT Sol.<br>(mg/ml) | Silicos-<br>IT Sol.<br>(mol/l) | Silicos-<br>IT<br>class |
|-----|---------|-----------------|---------------|---------------------------|---------------------------|---------------|--------------|--------------------|--------------------|--------------|-------------------------|--------------------------------|--------------------------------|-------------------------|
| 94  | 4Dc3    | -0.28           | 2.72          | 130000                    | 527                       | H             | 3.17         | 362000             | 1460               | H            | 1.07                    | 2900                           | 11.7                           | S                       |
| 95  | 4Dc4    | -0.41           | 2.33          | 46500                     | 216                       | H             | 3.27         | 399000             | 1850               | H            | -0.05                   | 193                            | 0.9                            | S                       |
| 96  | 4Dc5    | -0.27           | 2.62          | 89300                     | 415                       | H             | 3.73         | 1170000            | 5430               | H            | -0.05                   | 193                            | 0.9                            | S                       |
| 97  | 4Dc6    | -0.17           | 4.3           | 5770000                   | 19900                     | H             | 5.27         | -                  | 188000             | H            | 2.69                    | 141000                         | 486                            | S                       |
| 98  | 4Dc7    | -0.66           | 4.15          | 4070000                   | 14000                     | H             | 5.32         | -                  | 208000             | H            | 2.5                     | 90700                          | 313                            | S                       |
| 99  | 4Dc8    | -0.14           | 3.81          | 1670000                   | 6410                      | H             | 5.34         | -                  | 221000             | H            | 1.35                    | 5820                           | 22.4                           | S                       |
| 100 | 4Dd1.1  | -0.32           | 2.34          | 32200                     | 217                       | H             | 3            | 147000             | 993                | H            | 0.39                    | 360                            | 2.43                           | S                       |
| 101 | 4Dd1.2  | 0.3             | 1.67          | 6830                      | 46.7                      | H             | 2.09         | 18200              | 124                | H            | 0.66                    | 663                            | 4.54                           | S                       |
| 102 | 4Dd1.3  | 0.17            | 1.16          | 2090                      | 14.3                      | H             | 1.36         | 3330               | 22.8               | H            | 0.78                    | 887                            | 6.07                           | S                       |
| 103 | 4Dd1.4  | 0.03            | 1.81          | 9390                      | 64.3                      | H             | 2.62         | 60400              | 413                | H            | 0.47                    | 427                            | 2.92                           | S                       |
| 104 | 4Dd2.1  | -1.29           | 1.46          | 5120                      | 28.9                      | H             | 1.31         | 3600               | 20.3               | H            | 1.13                    | 2400                           | 13.5                           | S                       |
| 105 | 4Dd3.1  | 0.29            | 1.15          | 1860                      | 14.2                      | H             | 1.79         | 8070               | 61.6               | H            | 0.75                    | 743                            | 5.66                           | S                       |
| 106 | 4Dd4.1  | -1.37           | 1.94          | 26500                     | 87.4                      | H             | 2.1          | 38300              | 126                | H            | -0.24                   | 175                            | 0.58                           | S                       |
| 107 | 4Dd4.2  | -1.48           | 1.7           | 15900                     | 50.1                      | H             | 1.74         | 17300              | 54.7               | H            | -0.64                   | 73                             | 0.23                           | S                       |
| 108 | 4Dd4.3  | -1.9            | 1.84          | 22800                     | 68.7                      | H             | 1.64         | 14400              | 43.5               | H            | -0.55                   | 93.8                           | 0.28                           | S                       |
| 109 | 4Dd4.m  | -0.31           | 1.76          | 11500                     | 57.1                      | H             | 2.23         | 34700              | 171                | H            | -0.35                   | 90.7                           | 0.45                           | S                       |
| 110 | 5Aa1    | -3.52           | -1.58         | 12.9                      | 0.03                      | V             | -1.02        | 46.5               | 0.1                | V            | -5.84                   | 0                              | 0                              | M                       |
| 111 | 5Aa2    | -3.97           | -3.44         | 0.16                      | 0                         | S             | -2.84        | 0.66               | 0                  | S            | -6.72                   | 0                              | 0                              | P                       |
| 112 | 5Aa3    | -3.52           | -1.64         | 12.3                      | 0.02                      | V             | -1.47        | 18                 | 0.03               | V            | -4.21                   | 0.03                           | 0                              | M                       |
| 113 | 5Aa4    | -3.48           | -1.64         | 12.3                      | 0.02                      | V             | -1.47        | 18                 | 0.03               | V            | -4.21                   | 0.03                           | 0                              | M                       |
| 114 | 5Ba1    | -4.32           | -5.99         | 0                         | 0                         | M             | -6.18        | 0                  | 0                  | P            | -10.69                  | 0                              | 0                              | I                       |
| 115 | 5Ba2    | -4.29           | -5.99         | 0                         | 0                         | M             | -6.18        | 0                  | 0                  | P            | -10.69                  | 0                              | 0                              | I                       |
| 116 | 5Ca1    | -3.45           | -2.97         | 0.48                      | 0                         | S             | -2.9         | 0.56               | 0                  | S            | -5.73                   | 0                              | 0                              | M                       |
| 117 | 5Ca2    | -3.39           | -2.97         | 0.48                      | 0                         | S             | -2.9         | 0.56               | 0                  | S            | -5.73                   | 0                              | 0                              | M                       |
| 118 | 5Da1    | -2.67           | -0.94         | 48.2                      | 0.12                      | V             | -0.26        | 230                | 0.55               | V            | -1.72                   | 8.03                           | 0.02                           | S                       |

| <b>No.</b> | <b>ID code</b> | <b>logS<br/>AquaSol</b> | <b>ESOL<br/>Log S</b> | <b>ESOL<br/>Solub.<br/>(mg/ml)</b> | <b>ESOL<br/>Solub.<br/>(mol/l)</b> | <b>ESOL<br/>Class</b> | <b>Ali<br/>Log S</b> | <b>Ali Sol<br/>(mg/ml)</b> | <b>Ali Sol<br/>(mol/l)</b> | <b>Ali<br/>Class</b> | <b>Silicos-<br/>IT<br/>LogSw</b> | <b>Silicos-<br/>IT Sol.<br/>(mg/ml)</b> | <b>Silicos-<br/>IT Sol.<br/>(mol/l)</b> | <b>Silicos-<br/>IT<br/>class</b> |
|------------|----------------|-------------------------|-----------------------|------------------------------------|------------------------------------|-----------------------|----------------------|----------------------------|----------------------------|----------------------|----------------------------------|-----------------------------------------|-----------------------------------------|----------------------------------|
| 119        | 5Da2           | -2.57                   | -0.94                 | 48.2                               | 0.12                               | V                     | -0.26                | 230                        | 0.55                       | V                    | -1.72                            | 8.03                                    | 0.02                                    | S                                |
| 120        | 5Da3           | -3.11                   | 0.41                  | 1410                               | 2.57                               | H                     | 1.12                 | 7160                       | 13.1                       | H                    | -1.71                            | 10.6                                    | 0.02                                    | S                                |
| 121        | 5Ea1           | -2.88                   | -0.16                 | 289                                | 0.7                                | V                     | 1                    | 4170                       | 10                         | H                    | -2.18                            | 2.73                                    | 0.01                                    | S                                |
| 122        | 5Ea2           | -2.83                   | -0.16                 | 289                                | 0.7                                | V                     | 1                    | 4170                       | 10                         | H                    | -2.18                            | 2.73                                    | 0.01                                    | S                                |
| 123        | 5Ea3           | -3.24                   | 1.19                  | 8470                               | 15.5                               | H                     | 2.38                 | 130000                     | 238                        | H                    | -2.18                            | 3.59                                    | 0.01                                    | S                                |

**Table S5.** Lipophilicity - partition coefficients.

The **n-octanol and water partition coefficient (LogP)** is the classical descriptor of the lipophilicity of a compound (at a pH value at which all the molecules of the compound are in undissociated form). Most computational methods for estimating logP use multiple predictors, either to select the most accurate method, or to generate an „consensus” estimation [11]:

- **XLOGP3** – an atomistic method (calculated with XLOGP program, version 3.2.2, CCBG, Shanghai Institute of Organic Chemistry), which includes correction factors and an information library [11, 25-27];
- **WLOGP** – a purely atomistic method based on the fragmentation system *Wildman și Crippen (1999)* [28];
- **MLOGP** – a subtype of topological method (implemented by *Moriguchi I. et al. (1992)*, *Moriguchi I. et al. (1994)*, *Lipinski PA. et al. (2001)*) based on a linear relationship with 13 molecular descriptors [29,30];
- **SILICOS-IT** – a hybrid method based on 27 fragments and 7 topological descriptors (calculated with FILTER-IT, version 1.0.2, SILICOS-IT, <http://www.silicos-it.com>);
- **iLOGP** is an „in-house physics-based” method implemented by *Daina A. et al. (2014)*, which is based on the solvation free energies in n-octanol and water, calculated according to the GB/SA model (*Generalized-Born and solvent accessible surface area*) [11];
- **Consensus logP** represents the arithmetic mean of the values calculated by the 5 proposed methods [11].

| ID code | iLOGP | XLOGP | WLOGP | MLOGP | Silicos-IT Log P | Consensus Log P | logP   | logD at pH 7,4 | HLB   |
|---------|-------|-------|-------|-------|------------------|-----------------|--------|----------------|-------|
| 1Aa1    | 0.58  | -2.43 | -1.04 | -3.18 | -1.04            | -1.42           | -3.386 | -3.36          | 18.92 |
| 1Aa2    | 0.62  | -3.54 | -1.04 | -0.96 | -1.04            | -1.19           | -1.22  | -4.11          | 18.92 |
| 1Aa3    | 0.9   | -2.07 | -0.65 | -2.8  | -0.68            | -1.06           | -2.963 | -3.62          | 17.96 |
| 1Aa4    | 0.83  | -3.17 | -0.65 | -0.58 | -0.68            | -0.85           | -0.797 | -3.75          | 17.96 |
| 1Aa5    | 1.18  | -3.36 | -0.65 | -2.8  | -0.68            | -1.26           | -3.028 | -3.7           | 18.01 |
| 1Aa6    | 0.95  | -3.36 | -0.65 | -0.58 | -0.68            | -0.87           | -0.862 | -3.86          | 18.01 |
| 1Aa7    | 1.26  | -3    | -0.26 | -2.45 | -0.3             | -0.95           | -2.605 | -3.36          | 17.15 |
| 1Aa8    | 1.4   | -2.82 | -0.26 | -0.23 | -0.3             | -0.44           | -0.439 | -3.49          | 17.15 |
| 1Ba1    | 0.43  | -3.15 | -1.34 | -3.58 | -1.42            | -1.81           | -4.077 | -4.59          | 22.35 |

| ID code | iLOGP | XLOGP | WLOGP | MLOGP | Silicos-IT Log P | Consensus Log P | logP   | logD at pH 7,4 | HLB   |
|---------|-------|-------|-------|-------|------------------|-----------------|--------|----------------|-------|
| 1Ba2    | -0.2  | -1.52 | -1.94 | -1.77 | -1.66            | -1.42           | -2.639 | -3.52          | 26.72 |
| 1Ba3    | 0.26  | -4.34 | -1.34 | -1.37 | -1.42            | -1.64           | -1.911 | -4.61          | 22.35 |
| 1Ca1    | 0.91  | -2.71 | -0.06 | -2.78 | -0.07            | -0.94           | -2.688 | -3.26          | 15.18 |
| 1Ca2    | 1.06  | 0.74  | 0.62  | -0.17 | 1.05             | 0.66            | 0.139  | 0.01           | 12.68 |
| 1Ca3    | 0.58  | -2.71 | -0.06 | -0.57 | -0.07            | -0.56           | -0.522 | -3.68          | 15.18 |
| 1Da1    | 0.5   | -3.5  | -1.51 | -3.27 | -1.37            | -1.83           | -2.752 | -4.67          | 20.66 |
| 1Da2    | 0.57  | -3.58 | -0.73 | -2.54 | -0.67            | -1.39           | -2.578 | -3.95          | 19.02 |
| 1Da3    | 0.84  | -3.4  | -0.73 | -0.33 | -0.67            | -0.86           | -0.412 | -4.14          | 19.02 |
| 1Da4    | 0.44  | -0.91 | -0.82 | -0.52 | 0.12             | -0.34           | -0.483 | -1.23          | 18.13 |
| 2Aa1    | 0.42  | -1.82 | -0.56 | -0.73 | -0.75            | -0.69           | -0.907 | -7.62          | 17.4  |
| 2Ba1    | 0.85  | -3    | -0.48 | -2.8  | -0.76            | -1.24           | -0.793 | -6.41          | 17.83 |
| 2Ba2    | 0.88  | -2.53 | -0.13 | -0.23 | -0.83            | -0.57           | -0.554 | -6.18          | 17.65 |
| 2Ba3    | -2.71 | -0.24 | 0.01  | -3.58 | -0.76            | -1.46           | -0.745 | -7.17          | 17.75 |
| 2Ba4    | 0.86  | -2.63 | -0.09 | -2.45 | -0.38            | -0.94           | -0.37  | -5.99          | 16.97 |
| 2Ba5    | 1.4   | -1.8  | 0.65  | 0.42  | -0.03            | 0.13            | 0.292  | -5.36          | 16.08 |
| 2Ba6    | 1.21  | -2.17 | 0.26  | 0.1   | -0.43            | -0.21           | -0.131 | -5.77          | 16.83 |
| 2Ba6a   | 1.42  | -1.35 | 1.08  | 1.02  | 1.15             | 0.66            | 0.976  | -4.88          | 15.46 |
| 2Ca1    | 0.18  | -0.97 | -0.7  | -0.96 | -0.95            | -0.68           | -1.116 | -7.54          | 13.49 |
| 3Aa1    | 0.88  | 0.75  | 0.68  | -2.87 | 0.79             | 0.05            | -0.377 | -5.62          | 11.93 |
| 3Aa2    | 0.74  | 0.49  | 0.4   | -0.39 | -0.27            | 0.19            | 0.817  | -5.71          | 18.4  |
| 3Aa3    | 1.05  | -2.33 | 0.52  | -3.55 | 1.29             | -0.6            | -3.165 | -3.71          | 16.25 |
| 3Aa4    | 1.52  | -3.05 | -0.2  | -3.01 | -0.51            | -1.05           | -2.768 | -3.34          | 22.77 |
| 3Aa5    | 0.8   | -2.33 | 0.52  | -1.33 | 1.29             | -0.21           | -0.999 | -3.93          | 16.25 |
| 3Aa6    | 1.01  | -3.05 | -0.2  | -0.79 | -0.51            | -0.71           | -0.602 | -3.36          | 22.77 |
| 3Aa7    | 1.36  | 0.43  | 0.81  | 0.58  | 2.09             | 1.05            | -0.332 | 0.51           | 14.24 |
| 3Aa8    | 1.13  | 0.08  | 0.28  | -0.1  | 2.25             | 0.73            | -0.917 | -0.04          | 14.28 |

| ID code | iLOGP | XLOGP | WLOGP | MLOGP | Silicos-IT Log P | Consensus Log P | logP   | logD at pH 7,4 | HLB   |
|---------|-------|-------|-------|-------|------------------|-----------------|--------|----------------|-------|
| 3Aa9    | 1.17  | 0.81  | 0.32  | 0.44  | 0.77             | 0.7             | 1.088  | 0.58           | 18.66 |
| 3Ab10   | 0.94  | 1.07  | 0.6   | 0.15  | 1.77             | 0.91            | 0.323  | 0.54           | 12.17 |
| 3Ba1    | 0.57  | 0.14  | 0.21  | -3.27 | -0.46            | -0.56           | -0.627 | -7.44          | 12.31 |
| 3Ba2    | 0.79  | -2.95 | 0.05  | -3.95 | 0.04             | -1.2            | -3.527 | -4.56          | 16.61 |
| 3Ba3    | 0.74  | -2.95 | 0.05  | -1.74 | 0.04             | -0.77           | -1.361 | -4.82          | 16.61 |
| 3Ba4    | 0.56  | -3.33 | 0.33  | -4.09 | -0.9             | -1.49           | -3.781 | -5.08          | 17.26 |
| 3Ba5    | 1.43  | -0.31 | -1.21 | -0.39 | -0.11            | -0.12           | 0.272  | -0.57          | 21.32 |
| 3Ba6    | 1.32  | -0.19 | 0.34  | 0.15  | 0.84             | 0.49            | -0.591 | -0.17          | 14.61 |
| 3Bb7    | 1.19  | 0.27  | -0.4  | 0.02  | 0.21             | 0.26            | 0.803  | 0.08           | 18.57 |
| 3Bb8    | 0.81  | 0.46  | 0.13  | -0.25 | 0.52             | 0.33            | 0.073  | 0.08           | 12.58 |
| 4Aa1    | 2.1   | 2.58  | 3     | 2.58  | 2.98             | 2.65            | 1.951  | -2.45          | 7.67  |
| 4Aa2    | 2.48  | 0.94  | 2.71  | 0.46  | 3.16             | 1.95            | 0.572  | 0.79           | 11.56 |
| 4Aa3    | 2.08  | -2.25 | 0.96  | -1.07 | 1.29             | 0.2             | -1.148 | -1.89          | 19.38 |
| 4Ab1    | 0.36  | -1.11 | -0.63 | -1.11 | -2.2             | -0.94           | -1.779 | -7.73          | 18.48 |
| 4Ab2    | 0.87  | -4.23 | -1.02 | -3.67 | -1.22            | -1.86           | -3.447 | -4.05          | 22.6  |
| 4Ac1    | 0.67  | -5.51 | -0.97 | -2.8  | -1.44            | -2.01           | -0.033 | -6.56          | 23.59 |
| 4Ad1    | 0.99  | -1.35 | 0.78  | -0.73 | -1.8             | -0.42           | -2.192 | -1.35          | 24.12 |
| 4Ad2    | 1.33  | -1.8  | 0.43  | -1.14 | -1.8             | -0.6            | -2.687 | -2.99          | 24.57 |
| 4Ad3    | 1.94  | -1.09 | 1.21  | -0.41 | -1.19            | 0.09            | -1.971 | -3.4           | 23.19 |
| 4Ae1    | 0     | -1.26 | 0.82  | -2.17 | 0.88             | -0.35           | 0      | -0.98          | 24.56 |
| 4Ae2    | 0     | -1.01 | 0.36  | -2.17 | 0.86             | -0.39           | 0      | -0.59          | 24.6  |
| 4Ba1    | 0.42  | -3.28 | -1.93 | -3.67 | -1.55            | -2              | -3.27  | -4.48          | 21.41 |
| 4Ba2    | 0.4   | -3.29 | -1.54 | -3.29 | -1.38            | -1.82           | -3.034 | -4.36          | 20.5  |
| 4Ba3    | 1.35  | -0.81 | -0.99 | -0.55 | -0.72            | -0.35           | -0.695 | -1.16          | 19.05 |
| 4Ba4    | 1.1   | -3.36 | -1.15 | -2.94 | -0.88            | -1.44           | -3.096 | -3.75          | 19.75 |
| 4Ba5    | 0.67  | -3.38 | -0.76 | -2.6  | -0.66            | -1.35           | -2.86  | -3.64          | 18.98 |

| ID code | iLOGP | XLOGP | WLOGP | MLOGP | Silicos-IT Log P | Consensus Log P | logP   | logD at pH 7,4 | HLB   |
|---------|-------|-------|-------|-------|------------------|-----------------|--------|----------------|-------|
| 4Ba6    | 1.19  | -0.31 | -0.59 | -0.46 | -0.23            | -0.08           | -0.497 | -0.1           | 16.58 |
| 4Ba7    | 1.11  | -0.8  | -0.77 | -0.16 | 0.39             | -0.04           | -0.897 | -1.11          | 15.71 |
| 4Ca1    | 0.36  | -0.86 | 0.05  | -0.15 | -0.99            | -0.32           | -0.291 | -2.31          | 17.08 |
| 4Ca2    | 0.5   | -1.07 | 0.2   | -0.15 | -0.82            | -0.27           | -0.226 | -2.47          | 17.08 |
| 4Ca3    | 0.56  | -0.95 | -0.4  | -0.55 | -1.12            | -0.49           | -1.065 | -4.05          | 17.1  |
| 4Ca4    | 0.14  | -1.16 | -0.25 | -0.55 | -0.95            | -0.55           | -1     | -4.2           | 17.1  |
| 4Cb1    | 0.12  | -1.23 | -0.34 | -0.54 | -1.1             | -0.62           | -0.696 | -2.64          | 17.16 |
| 4Cb2    | 0.04  | -3.98 | -1.26 | -3.57 | -1.76            | -2.1            | -3.876 | -3.75          | 23.67 |
| 4Cb3    | 0.12  | -4.17 | -1.62 | -3.57 | -0.83            | -2.01           | -1.198 | -3.35          | 24.32 |
| 4Cb4    | 0.14  | -3.63 | -1.67 | -1.35 | -2.05            | -1.71           | -1.051 | -3.11          | 25.02 |
| 4Cb5    | 0.62  | -0.87 | 0.05  | -0.16 | -0.85            | -0.24           | -0.338 | -2.25          | 16.36 |
| 4Cb6    | 0.15  | -4.17 | -0.87 | -3.19 | -1.53            | -1.92           | -3.518 | -4.79          | 22.84 |
| 4Cb7    | 0.61  | -3.74 | -1.62 | -3.57 | -1.65            | -1.99           | -0.503 | -3.39          | 24.32 |
| 4Da1    | 0     | -3.93 | 0.36  | -3.36 | -1.39            | -1.66           | -4.31  | -3.46          | 17.96 |
| 4Da2    | 0     | -2.7  | 0.55  | -3.27 | -1.47            | -1.38           | -1.04  | -3.88          | 17.93 |
| 4Da3    | 0     | -2.66 | 0.41  | -3.27 | -1.47            | -1.4            | -1.07  | -3.92          | 17.98 |
| 4Da4    | -0.27 | -3.3  | 0.56  | -3.27 | -1.23            | -1.5            | -3.076 | -6.56          | 19.34 |
| 4Da5    | -0.78 | -2.4  | 0.56  | -3.27 | -1.4             | -1.46           | -3.137 | -6.47          | 19.3  |
| 4Da6    | -0.24 | -2.4  | 0.42  | -3.27 | -1.4             | -1.38           | -3.137 | -6.51          | 19.34 |
| 4Da7    | 0.25  | -2.13 | 0.08  | -3.66 | -0.79            | -1.25           | -2.727 | -5.02          | 18.59 |
| 4Da8    | 0.5   | -1.79 | -0.13 | -1.45 | -1.08            | -0.79           | -0.601 | -4.42          | 19.22 |
| 4Da9    | 0.37  | -2.07 | -0.08 | -3.66 | 0.24             | -1.04           | -0.73  | -4.59          | 18.55 |
| 4Da10   | 0.32  | -2.33 | 0.47  | -3.29 | -0.57            | -1.08           | -2.798 | -4.85          | 17.77 |
| 4Da11   | 0.26  | -1.9  | -0.08 | -3.66 | -0.68            | -1.21           | -0.482 | -4.5           | 18.59 |
| 4Db1    | -0.09 | -4.01 | -1.11 | -3.57 | 1.33             | -1.49           | -1.566 | -7.05          | 18.59 |
| 4Db2    | 0.01  | -4.13 | -0.56 | -3.57 | -1.47            | -1.94           | -3.212 | -7.2           | 18.59 |

| ID code | iLOGP | XLOGP | WLOGP | MLOGP | Silicos-IT Log P | Consensus Log P | logP   | logD at pH 7,4 | HLB   |
|---------|-------|-------|-------|-------|------------------|-----------------|--------|----------------|-------|
| 4Db3    | 0.03  | -3.9  | -0.72 | -3.57 | -1.36            | -1.9            | -1.396 | -6.26          | 18.59 |
| 4Db4    | 0.42  | -4.32 | -0.17 | -3.19 | -1.25            | -1.7            | -3.712 | -7.23          | 17.77 |
| 4Db5    | -0.17 | -3.99 | -0.68 | -3.19 | -1.15            | -1.83           | -0.343 | -6.82          | 18.35 |
| 4Db6    | 0.37  | -3.64 | -0.29 | -2.84 | -0.92            | -1.46           | -0.843 | -6.86          | 17.57 |
| 4Dc1    | -0.93 | -5.41 | -0.2  | -1.76 | -2.63            | -2.19           | -2.867 | -7.02          | 17.57 |
| 4Dc2    | -0.88 | -5.87 | -0.55 | -1.76 | -2.63            | -2.34           | -2.867 | -6.94          | 18.03 |
| 4Dc3    | -1.16 | -5.87 | -0.55 | -1.76 | -2.63            | -2.39           | -2.867 | -7.31          | 18.03 |
| 4Dc4    | -0.02 | -5.15 | 0.46  | -0.96 | -1.66            | -1.47           | -1.593 | -5.89          | 18.41 |
| 4Dc5    | 0.15  | -5.6  | 0.11  | -0.96 | -1.66            | -1.59           | -1.593 | -6.17          | 18.94 |
| 4Dc6    | -0.84 | -8.9  | -2.23 | -5.99 | -4.48            | -4.49           | -7.065 | -11.01         | 25.73 |
| 4Dc7    | -1.42 | -8.66 | -2.39 | -5.58 | -4.42            | -4.5            | -4.488 | -10.22         | 25.73 |
| 4Dc8    | -1.23 | -7.93 | -1.46 | -2.54 | -3.37            | -3.31           | -3.615 | -6.1           | 23.71 |
| 4Dd1.1  | 0.69  | -4.39 | -0.84 | -3.07 | -1.51            | -1.82           | -2.971 | -4.01          | 23.23 |
| 4Dd1.2  | 0.48  | -3.52 | -1.23 | -3.46 | -1.51            | -1.85           | -3.62  | -4.59          | 23.26 |
| 4Dd1.3  | 0.63  | -2.81 | -1.09 | -3.46 | -1.55            | -1.66           | -2.599 | -4.27          | 23.21 |
| 4Dd1.4  | 0.68  | -3.74 | -1.74 | -3.46 | -1.38            | -1.93           | -1.109 | -4.35          | 24.03 |
| 4Dd2.1  | 1.04  | -3.18 | -0.45 | -3.98 | -1.82            | -1.68           | -3.506 | -3.83          | 23.47 |
| 4Dd3.1  | 0.52  | -2.76 | -0.81 | -1.23 | -0.59            | -0.97           | -0.657 | -3.92          | 17.88 |
| 4Dd4.1  | 0.87  | -4.87 | -3.09 | -1.6  | -1.04            | -1.95           | -4.246 | -5.99          | 28.59 |
| 4Dd4.2  | 1.21  | -4.52 | -2.7  | -1.33 | -0.65            | -1.59           | -3.888 | -5.93          | 28.02 |
| 4Dd4.3  | 0.18  | -4.77 | -2.6  | -1.37 | -0.89            | -1.89           | -4.099 | -8.87          | 28.52 |
| 4Dd4.m  | 0.55  | -4    | -1.95 | -2.95 | -0.52            | -1.77           | -3.272 | -4.75          | 22.51 |
| 5Aa1    | 2.25  | -1.43 | 2.32  | -1.76 | 3.32             | 0.94            | 1.072  | -4.83          | 16.05 |
| 5Aa2    | 3.57  | 1.32  | 2.57  | 1.2   | 4.18             | 2.57            | 1.395  | 1.43           | 13.09 |
| 5Aa3    | 3.08  | -1.3  | 2.12  | -1.94 | 2.13             | 0.82            | -1.417 | -3.19          | 20.58 |
| 5Aa4    | 3.04  | -1.3  | 2.12  | 0.28  | 2.13             | 1.25            | 0.749  | -3.39          | 20.58 |



| ID code | iLOGP | XLOGP | WLOGP | MLOGP | Silicos-IT Log P | Consensus Log P | logP   | logD at pH 7,4 | HLB   |
|---------|-------|-------|-------|-------|------------------|-----------------|--------|----------------|-------|
| 5Ba1    | 4.63  | 3.51  | 4.74  | 0.51  | 6.37             | 3.95            | -0.004 | 0.8            | 22.89 |
| 5Ba2    | 4.81  | 3.51  | 4.74  | 2.73  | 6.37             | 4.43            | 2.162  | 1.28           | 22.89 |
| 5Ca1    | 2.8   | 0.97  | 2.72  | -0.45 | 3.28             | 1.86            | -0.179 | -0.27          | 14.42 |
| 5Ca2    | 2.65  | 0.97  | 2.72  | 1.76  | 3.28             | 2.28            | 1.987  | -0.5           | 14.42 |
| 5Da1    | 2.12  | -1.98 | 0.04  | -1.62 | 0.36             | -0.21           | -2.708 | -4.63          | 21.64 |
| 5Da2    | 2.45  | -1.98 | 0.04  | -1.62 | 0.36             | -0.15           | -2.708 | -4.42          | 21.64 |
| 5Da3    | 2.07  | -4.71 | -0.22 | -4.35 | 0.05             | -1.43           | -3.071 | -7.7           | 28.17 |
| 5Ea1    | -1.98 | -3.19 | -0.26 | -1.78 | -0.1             | -1.46           | -3.411 | -4.81          | 20.12 |
| 5Ea2    | -1.37 | -3.19 | -0.26 | -1.78 | -0.1             | -1.34           | -3.411 | -4.81          | 20.12 |
| 5Ea3    | -1.69 | -5.92 | -0.52 | -4.5  | -0.42            | -2.61           | -3.774 | -7.65          | 30.7  |

**Table S6.** Toxicity (I): Cramer rules, Kroess and Verhaar scheme.

| ID code | Cramer rules            | Kroess TTC                                                                                      |                                                                  | Verhaar scheme                                              |
|---------|-------------------------|-------------------------------------------------------------------------------------------------|------------------------------------------------------------------|-------------------------------------------------------------|
|         | Toxic hazard            | Estimate                                                                                        | Explanation                                                      |                                                             |
| 1Aa1    | Low (Class I)           | Substance would not be expected to be a safety concern                                          | Verify structural alerts for potential genotoxic carcinogenicity | Class 5 (Not possible to classify according to these rules) |
| 1Aa2    | Low (Class I)           | Substance would not be expected to be a safety concern                                          | Verify structural alerts for potential genotoxic carcinogenicity | Class 5 (Not possible to classify according to these rules) |
| 1Aa3    | Low (Class I)           | Substance would not be expected to be a safety concern                                          | Verify structural alerts for potential genotoxic carcinogenicity | Class 5 (Not possible to classify according to these rules) |
| 1Aa4    | Low (Class I)           | Substance would not be expected to be a safety concern                                          | Verify structural alerts for potential genotoxic carcinogenicity | Class 5 (Not possible to classify according to these rules) |
| 1Aa5    | Low (Class I)           | Substance would not be expected to be a safety concern                                          | Verify structural alerts for potential genotoxic carcinogenicity | Class 5 (Not possible to classify according to these rules) |
| 1Aa6    | Low (Class I)           | Substance would not be expected to be a safety concern                                          | Verify structural alerts for potential genotoxic carcinogenicity | Class 5 (Not possible to classify according to these rules) |
| 1Aa7    | Low (Class I)           | Substance would not be expected to be a safety concern                                          | Verify structural alerts for potential genotoxic carcinogenicity | Class 5 (Not possible to classify according to these rules) |
| 1Aa8    | Low (Class I)           | Substance would not be expected to be a safety concern                                          | Verify structural alerts for potential genotoxic carcinogenicity | Class 5 (Not possible to classify according to these rules) |
| 1Ba1    | Intermediate (Class II) | Substance would not be expected to be a safety concern                                          | Verify structural alerts for potential genotoxic carcinogenicity | Class 5 (Not possible to classify according to these rules) |
| 1Ba2    | High (Class III)        | Substance would not be expected to be a safety concern                                          | Verify structural alerts for potential genotoxic carcinogenicity | Class 5 (Not possible to classify according to these rules) |
| 1Ba3    | High (Class III)        | Substance would not be expected to be a safety concern                                          | Verify structural alerts for potential genotoxic carcinogenicity | Class 5 (Not possible to classify according to these rules) |
| 1Ca1    | High (Class III)        | Negligible risk (low probability of a life-time cancer risk greater than 1 in 10 <sup>6</sup> ) | Genotoxic potential. Acyl halides                                | Class 5 (Not possible to classify according to these rules) |
| 1Ca2    | High (Class III)        | Negligible risk (low probability of a life-time cancer risk greater than 1 in 10 <sup>6</sup> ) | Genotoxic potential. Acyl halides                                | Class 3 (unspecific reactivity)                             |
| 1Ca3    | High (Class III)        | Negligible risk (low probability of a life-time cancer risk greater than 1 in 10 <sup>6</sup> ) | Genotoxic potential. Acyl halides                                | Class 3 (unspecific reactivity)                             |
| 1Da1    | High (Class III)        | Substance would not be expected to be a safety concern                                          | Verify structural alerts for potential genotoxic carcinogenicity | Class 3 (unspecific reactivity)                             |
| 1Da2    | High (Class III)        | Substance would not be expected to be a safety concern                                          | Verify structural alerts for potential genotoxic carcinogenicity | Class 5 (Not possible to classify according to these rules) |
| 1Da3    | High (Class III)        | Substance would not be expected to be a safety concern                                          | Verify structural alerts for potential genotoxic carcinogenicity | Class 3 (unspecific reactivity)                             |

| ID code | Cramer rules            | Kroess TTC                                                                                      |                                                                  | Verhaar scheme                                              |
|---------|-------------------------|-------------------------------------------------------------------------------------------------|------------------------------------------------------------------|-------------------------------------------------------------|
|         | Toxic hazard            | Estimate                                                                                        | Explanation                                                      |                                                             |
| 1Da4    | High (Class III)        | Substance would not be expected to be a safety concern                                          | Verify structural alerts for potential genotoxic carcinogenicity | Class 3 (unspecific reactivity)                             |
| 2Aa1    | High (Class III)        | Substance would not be expected to be a safety concern                                          | Verify structural alerts for potential genotoxic carcinogenicity | Class 5 (Not possible to classify according to these rules) |
| 2Ba1    | High (Class III)        | Substance would not be expected to be a safety concern                                          | Verify structural alerts for potential genotoxic carcinogenicity | Class 5 (Not possible to classify according to these rules) |
| 2Ba2    | Low (Class I)           | Substance would not be expected to be a safety concern                                          | Verify structural alerts for potential genotoxic carcinogenicity | Class 5 (Not possible to classify according to these rules) |
| 2Ba3    | High (Class III)        | Substance would not be expected to be a safety concern                                          | Verify structural alerts for potential genotoxic carcinogenicity | Class 5 (Not possible to classify according to these rules) |
| 2Ba4    | High (Class III)        | Substance would not be expected to be a safety concern                                          | Verify structural alerts for potential genotoxic carcinogenicity | Class 5 (Not possible to classify according to these rules) |
| 2Ba5    | Low (Class I)           | Substance would not be expected to be a safety concern                                          | Verify structural alerts for potential genotoxic carcinogenicity | Class 5 (Not possible to classify according to these rules) |
| 2Ba6    | Low (Class I)           | Substance would not be expected to be a safety concern                                          | Verify structural alerts for potential genotoxic carcinogenicity | Class 5 (Not possible to classify according to these rules) |
| 2Ba6a   | High (Class III)        | Negligible risk (low probability of a life-time cancer risk greater than 1 in 10 <sup>6</sup> ) | Genotoxic potential. Gen.S or N mustard                          | Class 3 (unspecific reactivity)                             |
| 2Ca1    | Intermediate (Class II) | Substance would not be expected to be a safety concern                                          | Verify structural alerts for potential genotoxic carcinogenicity | Class 5 (Not possible to classify according to these rules) |
| 3Aa1    | High (Class III)        | Substance would not be expected to be a safety concern                                          | Verify structural alerts for potential genotoxic carcinogenicity | Class 5 (Not possible to classify according to these rules) |
| 3Aa2    | High (Class III)        | Substance would not be expected to be a safety concern                                          | Verify structural alerts for potential genotoxic carcinogenicity | Class 5 (Not possible to classify according to these rules) |
| 3Aa3    | High (Class III)        | Substance would not be expected to be a safety concern                                          | Verify structural alerts for potential genotoxic carcinogenicity | Class 5 (Not possible to classify according to these rules) |
| 3Aa4    | High (Class III)        | Substance would not be expected to be a safety concern                                          | Verify structural alerts for potential genotoxic carcinogenicity | Class 5 (Not possible to classify according to these rules) |
| 3Aa5    | High (Class III)        | Substance would not be expected to be a safety concern                                          | Verify structural alerts for potential genotoxic carcinogenicity | Class 5 (Not possible to classify according to these rules) |
| 3Aa6    | High (Class III)        | Substance would not be expected to be a safety concern                                          | Verify structural alerts for potential genotoxic carcinogenicity | Class 5 (Not possible to classify according to these rules) |
| 3Aa7    | High (Class III)        | Substance would not be expected to be a safety concern                                          | Verify structural alerts for potential genotoxic carcinogenicity | Class 5 (Not possible to classify according to these rules) |
| 3Aa8    | High (Class III)        | Substance would not be expected to be a safety concern                                          | Verify structural alerts for potential genotoxic carcinogenicity | Class 5 (Not possible to classify according to these rules) |

| ID code | Cramer rules     | Kroess TTC                                                                                      |                                                                    | Verhaar scheme                                              |
|---------|------------------|-------------------------------------------------------------------------------------------------|--------------------------------------------------------------------|-------------------------------------------------------------|
|         | Toxic hazard     | Estimate                                                                                        | Explanation                                                        |                                                             |
| 3Aa9    | High (Class III) | Substance would not be expected to be a safety concern                                          | Verify structural alerts for potential genotoxic carcinogenicity   | Class 3 (unspecific reactivity)                             |
| 3Ab10   | High (Class III) | Substance would not be expected to be a safety concern                                          | Verify structural alerts for potential genotoxic carcinogenicity   | Class 3 (unspecific reactivity)                             |
| 3Ba1    | High (Class III) | Substance would not be expected to be a safety concern                                          | Verify structural alerts for potential genotoxic carcinogenicity   | Class 5 (Not possible to classify according to these rules) |
| 3Ba2    | High (Class III) | Substance would not be expected to be a safety concern                                          | Verify structural alerts for potential genotoxic carcinogenicity   | Class 5 (Not possible to classify according to these rules) |
| 3Ba3    | High (Class III) | Substance would not be expected to be a safety concern                                          | Verify structural alerts for potential genotoxic carcinogenicity   | Class 5 (Not possible to classify according to these rules) |
| 3Ba4    | High (Class III) | Substance would not be expected to be a safety concern                                          | Verify structural alerts for potential genotoxic carcinogenicity   | Class 5 (Not possible to classify according to these rules) |
| 3Ba5    | High (Class III) | Substance would not be expected to be a safety concern                                          | Verify structural alerts for potential genotoxic carcinogenicity   | Class 5 (Not possible to classify according to these rules) |
| 3Ba6    | High (Class III) | Substance would not be expected to be a safety concern                                          | Verify structural alerts for potential genotoxic carcinogenicity   | Class 5 (Not possible to classify according to these rules) |
| 3Bb7    | High (Class III) | Substance would not be expected to be a safety concern                                          | Verify structural alerts for potential genotoxic carcinogenicity   | Class 3 (unspecific reactivity)                             |
| 3Bb8    | High (Class III) | Substance would not be expected to be a safety concern                                          | Verify structural alerts for potential genotoxic carcinogenicity   | Class 3 (unspecific reactivity)                             |
| 4Aa1    | High (Class III) | Negligible risk (low probability of a life-time cancer risk greater than 1 in 10 <sup>6</sup> ) | Genotoxic potential. Gen.S or N mustard                            | Class 3 (unspecific reactivity)                             |
| 4Aa2    | High (Class III) | Negligible risk (low probability of a life-time cancer risk greater than 1 in 10 <sup>6</sup> ) | Genotoxic potential. Gen.S or N mustard                            | Class 3 (unspecific reactivity)                             |
| 4Aa3    | High (Class III) | Negligible risk (low probability of a life-time cancer risk greater than 1 in 10 <sup>6</sup> ) | Genotoxic potential. Gen.S or N mustard                            | Class 5 (Not possible to classify according to these rules) |
| 4Ab1    | High (Class III) | Risk assessment requires compound-specific toxicity data                                        | Genotoxic potential. Aflatoxin-like, azoxy-, or N-nitroso compound | Class 5 (Not possible to classify according to these rules) |
| 4Ab2    | High (Class III) | Risk assessment requires compound-specific toxicity data                                        | Genotoxic potential. Aflatoxin-like, azoxy-, or N-nitroso compound | Class 5 (Not possible to classify according to these rules) |
| 4Ac1    | High (Class III) | Negligible risk (low probability of a life-time cancer risk greater than 1 in 10 <sup>6</sup> ) | Genotoxic potential. Hydrazine                                     | Class 3 (unspecific reactivity)                             |
| 4Ad1    | Low (Class I)    | Substance would not be expected to be a safety concern                                          | Verify structural alerts for potential genotoxic carcinogenicity   | Class 5 (Not possible to classify according to these rules) |
| 4Ad2    | Low (Class I)    | Substance would not be expected to be a safety concern                                          | Verify structural alerts for potential genotoxic carcinogenicity   | Class 5 (Not possible to classify according to these rules) |

| ID code | Cramer rules     | Kroess TTC                                                                                      |                                                                  | Verhaar scheme                                              |
|---------|------------------|-------------------------------------------------------------------------------------------------|------------------------------------------------------------------|-------------------------------------------------------------|
|         | Toxic hazard     | Estimate                                                                                        | Explanation                                                      |                                                             |
| 4Ad3    | Low (Class I)    | Substance would not be expected to be a safety concern                                          | Verify structural alerts for potential genotoxic carcinogenicity | Class 5 (Not possible to classify according to these rules) |
| 4Ae1    | High (Class III) | Substance would not be expected to be a safety concern                                          | Verify structural alerts for potential genotoxic carcinogenicity | Class 5 (Not possible to classify according to these rules) |
| 4Ae2    | High (Class III) | Substance would not be expected to be a safety concern                                          | Verify structural alerts for potential genotoxic carcinogenicity | Class 5 (Not possible to classify according to these rules) |
| 4Ba1    | Low (Class I)    | Substance would not be expected to be a safety concern                                          | Verify structural alerts for potential genotoxic carcinogenicity | Class 5 (Not possible to classify according to these rules) |
| 4Ba2    | Low (Class I)    | Substance would not be expected to be a safety concern                                          | Verify structural alerts for potential genotoxic carcinogenicity | Class 5 (Not possible to classify according to these rules) |
| 4Ba3    | Low (Class I)    | Substance would not be expected to be a safety concern                                          | Verify structural alerts for potential genotoxic carcinogenicity | Class 5 (Not possible to classify according to these rules) |
| 4Ba4    | Low (Class I)    | Substance would not be expected to be a safety concern                                          | Verify structural alerts for potential genotoxic carcinogenicity | Class 5 (Not possible to classify according to these rules) |
| 4Ba5    | Low (Class I)    | Substance would not be expected to be a safety concern                                          | Verify structural alerts for potential genotoxic carcinogenicity | Class 5 (Not possible to classify according to these rules) |
| 4Ba6    | High (Class III) | Substance would not be expected to be a safety concern                                          | Verify structural alerts for potential genotoxic carcinogenicity | Class 3 (unspecific reactivity)                             |
| 4Ba7    | High (Class III) | Substance would not be expected to be a safety concern                                          | Verify structural alerts for potential genotoxic carcinogenicity | Class 5 (Not possible to classify according to these rules) |
| 4Ca1    | High (Class III) | Substance would not be expected to be a safety concern                                          | Verify structural alerts for potential genotoxic carcinogenicity | Class 3 (unspecific reactivity)                             |
| 4Ca2    | High (Class III) | Substance would not be expected to be a safety concern                                          | Verify structural alerts for potential genotoxic carcinogenicity | Class 5 (Not possible to classify according to these rules) |
| 4Ca3    | High (Class III) | Substance would not be expected to be a safety concern                                          | Verify structural alerts for potential genotoxic carcinogenicity | Class 5 (Not possible to classify according to these rules) |
| 4Ca4    | High (Class III) | Substance would not be expected to be a safety concern                                          | Verify structural alerts for potential genotoxic carcinogenicity | Class 5 (Not possible to classify according to these rules) |
| 4Cb1    | High (Class III) | Substance would not be expected to be a safety concern                                          | Verify structural alerts for potential genotoxic carcinogenicity | Class 5 (Not possible to classify according to these rules) |
| 4Cb2    | High (Class III) | Substance would not be expected to be a safety concern                                          | Verify structural alerts for potential genotoxic carcinogenicity | Class 5 (Not possible to classify according to these rules) |
| 4Cb3    | High (Class III) | Negligible risk (low probability of a life-time cancer risk greater than 1 in 10 <sup>6</sup> ) | Genotoxic potential. Epoxides and aziridines                     | Class 5 (Not possible to classify according to these rules) |
| 4Cb4    | High (Class III) | Negligible risk (low probability of a life-time cancer risk greater than 1 in 10 <sup>6</sup> ) | Genotoxic potential. Epoxides and aziridines                     | Class 5 (Not possible to classify according to these rules) |

| ID code | Cramer rules     | Kroess TTC                                                                                      |                                                                                                                         | Verhaar scheme                                              |
|---------|------------------|-------------------------------------------------------------------------------------------------|-------------------------------------------------------------------------------------------------------------------------|-------------------------------------------------------------|
|         | Toxic hazard     | Estimate                                                                                        | Explanation                                                                                                             |                                                             |
| 4Cb5    | High (Class III) | Substance would not be expected to be a safety concern                                          | Verify structural alerts for potential genotoxic carcinogenicity                                                        | Class 5 (Not possible to classify according to these rules) |
| 4Cb6    | High (Class III) | Substance would not be expected to be a safety concern                                          | Verify structural alerts for potential genotoxic carcinogenicity                                                        | Class 5 (Not possible to classify according to these rules) |
| 4Cb7    | High (Class III) | Substance would not be expected to be a safety concern                                          | Verify structural alerts for potential genotoxic carcinogenicity                                                        | Class 5 (Not possible to classify according to these rules) |
| 4Da1    | High (Class III) | Substance would not be expected to be a safety concern                                          | Verify structural alerts for potential genotoxic carcinogenicity                                                        | Class 5 (Not possible to classify according to these rules) |
| 4Da2    | High (Class III) | Substance would not be expected to be a safety concern                                          | Verify structural alerts for potential genotoxic carcinogenicity                                                        | Class 5 (Not possible to classify according to these rules) |
| 4Da3    | High (Class III) | Substance would not be expected to be a safety concern                                          | Verify structural alerts for potential genotoxic carcinogenicity                                                        | Class 5 (Not possible to classify according to these rules) |
| 4Da4    | High (Class III) | Substance would not be expected to be a safety concern                                          | Verify structural alerts for potential genotoxic carcinogenicity                                                        | Class 5 (Not possible to classify according to these rules) |
| 4Da5    | High (Class III) | Substance would not be expected to be a safety concern                                          | Verify structural alerts for potential genotoxic carcinogenicity                                                        | Class 5 (Not possible to classify according to these rules) |
| 4Da6    | High (Class III) | Substance would not be expected to be a safety concern                                          | Verify structural alerts for potential genotoxic carcinogenicity                                                        | Class 5 (Not possible to classify according to these rules) |
| 4Da7    | High (Class III) | Substance would not be expected to be a safety concern                                          | Verify structural alerts for potential genotoxic carcinogenicity                                                        | Class 5 (Not possible to classify according to these rules) |
| 4Da8    | High (Class III) | Negligible risk (low probability of a life-time cancer risk greater than 1 in 10 <sup>6</sup> ) | Genotoxic potential. Epoxides and aziridines                                                                            | Class 3 (unspecific reactivity)                             |
| 4Da9    | High (Class III) | Negligible risk (low probability of a life-time cancer risk greater than 1 in 10 <sup>6</sup> ) | Genotoxic potential. Epoxides and aziridines                                                                            | Class 3 (unspecific reactivity)                             |
| 4Da10   | High (Class III) | Substance would not be expected to be a safety concern                                          | Verify structural alerts for potential genotoxic carcinogenicity                                                        | Class 5 (Not possible to classify according to these rules) |
| 4Da11   | High (Class III) | Substance would not be expected to be a safety concern                                          | Verify structural alerts for potential genotoxic carcinogenicity                                                        | Class 5 (Not possible to classify according to these rules) |
| 4Db1    | High (Class III) | Risk assessment requires compound-specific toxicity data                                        | Non-essential metal or metal-containing compound, or is it a polyhalogenated dibenzodioxin, -dibenzofuran, or -biphenyl | Class 5 (Not possible to classify according to these rules) |
| 4Db2    | High (Class III) | Risk assessment requires compound-specific toxicity data                                        | Non-essential metal or metal-containing compound, or is it a polyhalogenated dibenzodioxin, -dibenzofuran, or -biphenyl | Class 5 (Not possible to classify according to these rules) |
| 4Db3    | High (Class III) | Risk assessment requires compound-specific toxicity data                                        | Non-essential metal or metal-containing compound, or is it a polyhalogenated                                            | Class 5 (Not possible to classify according to these rules) |

| ID code | Cramer rules     | Kroess TTC                                               |                                                                                                                         | Verhaar scheme                                              |
|---------|------------------|----------------------------------------------------------|-------------------------------------------------------------------------------------------------------------------------|-------------------------------------------------------------|
|         | Toxic hazard     | Estimate                                                 | Explanation                                                                                                             |                                                             |
|         |                  |                                                          | dibenzodioxin, -dibenzofuran, or -biphenyl                                                                              |                                                             |
| 4Db4    | High (Class III) | Risk assessment requires compound-specific toxicity data | Non-essential metal or metal-containing compound, or is it a polyhalogenated dibenzodioxin, -dibenzofuran, or -biphenyl | Class 5 (Not possible to classify according to these rules) |
| 4Db5    | High (Class III) | Risk assessment requires compound-specific toxicity data | Non-essential metal or metal-containing compound, or is it a polyhalogenated dibenzodioxin, -dibenzofuran, or -biphenyl | Class 5 (Not possible to classify according to these rules) |
| 4Db6    | High (Class III) | Risk assessment requires compound-specific toxicity data | Non-essential metal or metal-containing compound, or is it a polyhalogenated dibenzodioxin, -dibenzofuran, or -biphenyl | Class 5 (Not possible to classify according to these rules) |
| 4Dc1    | High (Class III) | Risk assessment requires compound-specific toxicity data | Non-essential metal or metal-containing compound, or is it a polyhalogenated dibenzodioxin, -dibenzofuran, or -biphenyl | Class 5 (Not possible to classify according to these rules) |
| 4Dc2    | High (Class III) | Risk assessment requires compound-specific toxicity data | Non-essential metal or metal-containing compound, or is it a polyhalogenated dibenzodioxin, -dibenzofuran, or -biphenyl | Class 5 (Not possible to classify according to these rules) |
| 4Dc3    | High (Class III) | Risk assessment requires compound-specific toxicity data | Non-essential metal or metal-containing compound, or is it a polyhalogenated dibenzodioxin, -dibenzofuran, or -biphenyl | Class 5 (Not possible to classify according to these rules) |
| 4Dc4    | High (Class III) | Risk assessment requires compound-specific toxicity data | Non-essential metal or metal-containing compound, or is it a polyhalogenated dibenzodioxin, -dibenzofuran, or -biphenyl | Class 5 (Not possible to classify according to these rules) |
| 4Dc5    | High (Class III) | Risk assessment requires compound-specific toxicity data | Non-essential metal or metal-containing compound, or is it a polyhalogenated dibenzodioxin, -dibenzofuran, or -biphenyl | Class 5 (Not possible to classify according to these rules) |
| 4Dc6    | High (Class III) | Risk assessment requires compound-specific toxicity data | Non-essential metal or metal-containing compound, or is it a polyhalogenated dibenzodioxin, -dibenzofuran, or -biphenyl | Class 5 (Not possible to classify according to these rules) |
| 4Dc7    | High (Class III) | Risk assessment requires compound-specific toxicity data | Non-essential metal or metal-containing compound, or is it a polyhalogenated dibenzodioxin, -dibenzofuran, or -biphenyl | Class 5 (Not possible to classify according to these rules) |
| 4Dc8    | High (Class III) | Risk assessment requires compound-specific toxicity data | Non-essential metal or metal-containing compound, or is it a polyhalogenated dibenzodioxin, -dibenzofuran, or -biphenyl | Class 5 (Not possible to classify according to these rules) |
| 4Dd1.1  | High (Class III) | Substance would not be expected to be a safety concern   | Verify structural alerts for potential genotoxic carcinogenicity                                                        | Class 5 (Not possible to classify according to these rules) |

| ID code | Cramer rules     | Kroess TTC                                                                                      |                                                                                                     | Verhaar scheme                                              |
|---------|------------------|-------------------------------------------------------------------------------------------------|-----------------------------------------------------------------------------------------------------|-------------------------------------------------------------|
|         | Toxic hazard     | Estimate                                                                                        | Explanation                                                                                         |                                                             |
| 4Dd1.2  | High (Class III) | Substance would not be expected to be a safety concern                                          | Verify structural alerts for potential genotoxic carcinogenicity                                    | Class 5 (Not possible to classify according to these rules) |
| 4Dd1.3  | High (Class III) | Substance would not be expected to be a safety concern                                          | Verify structural alerts for potential genotoxic carcinogenicity                                    | Class 5 (Not possible to classify according to these rules) |
| 4Dd1.4  | High (Class III) | Substance would not be expected to be a safety concern                                          | Verify structural alerts for potential genotoxic carcinogenicity                                    | Class 5 (Not possible to classify according to these rules) |
| 4Dd2.1  | High (Class III) | Risk assessment requires compound-specific toxicity data                                        | Genotoxic potential. Aflatoxin-like, azoxy-, or N-nitroso compound. Alkyl and aryl N-nitroso groups | Class 5 (Not possible to classify according to these rules) |
| 4Dd3.1  | High (Class III) | Substance would not be expected to be a safety concern                                          | Verify structural alerts for potential genotoxic carcinogenicity                                    | Class 5 (Not possible to classify according to these rules) |
| 4Dd4.1  | High (Class III) | Substance would not be expected to be a safety concern                                          | Verify structural alerts for potential genotoxic carcinogenicity                                    | Class 5 (Not possible to classify according to these rules) |
| 4Dd4.2  | High (Class III) | Substance would not be expected to be a safety concern                                          | Verify structural alerts for potential genotoxic carcinogenicity                                    | Class 5 (Not possible to classify according to these rules) |
| 4Dd4.3  | High (Class III) | Substance would not be expected to be a safety concern                                          | Verify structural alerts for potential genotoxic carcinogenicity                                    | Class 5 (Not possible to classify according to these rules) |
| 4Dd4.m  | High (Class III) | Substance would not be expected to be a safety concern                                          | Verify structural alerts for potential genotoxic carcinogenicity                                    | Class 5 (Not possible to classify according to these rules) |
| 5Aa1    | Low (Class I)    | Substance would not be expected to be a safety concern                                          | Verify structural alerts for potential genotoxic carcinogenicity                                    | Class 5 (Not possible to classify according to these rules) |
| 5Aa2    | High (Class III) | Substance would not be expected to be a safety concern                                          | Verify structural alerts for potential genotoxic carcinogenicity                                    | Class 5 (Not possible to classify according to these rules) |
| 5Aa3    | Low (Class I)    | Substance would not be expected to be a safety concern                                          | Verify structural alerts for potential genotoxic carcinogenicity                                    | Class 5 (Not possible to classify according to these rules) |
| 5Aa4    | Low (Class I)    | Substance would not be expected to be a safety concern                                          | Verify structural alerts for potential genotoxic carcinogenicity                                    | Class 5 (Not possible to classify according to these rules) |
| 5Ba1    | High (Class III) | Substance would not be expected to be a safety concern                                          | Verify structural alerts for potential genotoxic carcinogenicity                                    | Class 5 (Not possible to classify according to these rules) |
| 5Ba2    | High (Class III) | Substance would not be expected to be a safety concern                                          | Verify structural alerts for potential genotoxic carcinogenicity                                    | Class 5 (Not possible to classify according to these rules) |
| 5Ca1    | High (Class III) | Negligible risk (low probability of a life-time cancer risk greater than 1 in 10 <sup>6</sup> ) | Genotoxic potential. Polycyclic Aromatic Hydrocarbons                                               | Class 5 (Not possible to classify according to these rules) |
| 5Ca2    | High (Class III) | Negligible risk (low probability of a life-time cancer risk greater than 1 in 10 <sup>6</sup> ) | Genotoxic potential. Polycyclic Aromatic Hydrocarbons                                               | Class 5 (Not possible to classify according to these rules) |



| ID code | Cramer rules     | Kroess TTC                                             |                                                                  | Verhaar scheme                                              |
|---------|------------------|--------------------------------------------------------|------------------------------------------------------------------|-------------------------------------------------------------|
|         | Toxic hazard     | Estimate                                               | Explanation                                                      |                                                             |
| 5Da1    | High (Class III) | Substance would not be expected to be a safety concern | Verify structural alerts for potential genotoxic carcinogenicity | Class 5 (Not possible to classify according to these rules) |
| 5Da2    | High (Class III) | Substance would not be expected to be a safety concern | Verify structural alerts for potential genotoxic carcinogenicity | Class 5 (Not possible to classify according to these rules) |
| 5Da3    | High (Class III) | Substance would not be expected to be a safety concern | Verify structural alerts for potential genotoxic carcinogenicity | Class 5 (Not possible to classify according to these rules) |
| 5Ea1    | High (Class III) | Substance would not be expected to be a safety concern | Verify structural alerts for potential genotoxic carcinogenicity | Class 5 (Not possible to classify according to these rules) |
| 5Ea2    | High (Class III) | Substance would not be expected to be a safety concern | Verify structural alerts for potential genotoxic carcinogenicity | Class 5 (Not possible to classify according to these rules) |
| 5Ea3    | High (Class III) | Substance would not be expected to be a safety concern | Verify structural alerts for potential genotoxic carcinogenicity | Class 5 (Not possible to classify according to these rules) |

**Table S7.** Toxicity (II). Carcinogenic (genotoxic and non-genotoxic) and mutagenic effects evaluated using two different apps (Toxtree and OSIRIS).

| ID code | Carcinogenicity                                |               |                      | Mutagenicity                                           |           |
|---------|------------------------------------------------|---------------|----------------------|--------------------------------------------------------|-----------|
|         | Genotoxic Toxtree                              | Non-genotoxic | Tumorigenesis OSIRIS | Toxtree (Ames test)<br><i>S. typhimurium</i>           | OSIRIS    |
| 1Aa1    | Negative                                       | Negative      | Negative             | Negative                                               | Negative  |
| 1Aa2    | Negative                                       | Negative      | Negative             | Negative                                               | Negative  |
| 1Aa3    | Negative                                       | Negative      | Negative             | Negative                                               | Negative  |
| 1Aa4    | Negative                                       | Negative      | Negative             | Negative                                               | Negative  |
| 1Aa5    | Negative                                       | Negative      | Negative             | Negative                                               | Negative  |
| 1Aa6    | Negative                                       | Negative      | Negative             | Negative                                               | Negative  |
| 1Aa7    | Negative                                       | Negative      | Negative             | Negative                                               | Negative  |
| 1Aa8    | Negative                                       | Negative      | Negative             | Negative                                               | Negative  |
| 1Ba1    | Negative                                       | Negative      | Negative             | Negative                                               | High risk |
| 1Ba2    | Negative                                       | Negative      | Negative             | Negative                                               | Negative  |
| 1Ba3    | Negative                                       | Negative      | Negative             | Negative                                               | Negative  |
| 1Ca1    | Structural Alert for genotoxic carcinogenicity | Negative      | Negative             | Structural alert for <i>S.typhimurium</i> mutagenicity | High risk |
| 1Ca2    | Structural Alert for genotoxic carcinogenicity | Negative      | Negative             | Structural alert for <i>S.typhimurium</i> mutagenicity | High risk |
| 1Ca3    | Structural Alert for genotoxic carcinogenicity | Negative      | Negative             | Structural alert for <i>S.typhimurium</i> mutagenicity | High risk |
| 1Da1    | Negative                                       | Negative      | Negative             | Negative                                               | Negative  |
| 1Da2    | Negative                                       | Negative      | Negative             | Negative                                               | Negative  |
| 1Da3    | Negative                                       | Negative      | Negative             | Negative                                               | Negative  |
| 1Da4    | Negative                                       | Negative      | Negative             | Negative                                               | Negative  |
| 2Aa1    | Negative                                       | Negative      | Negative             | Negative                                               | Negative  |
| 2Ba1    | Negative                                       | Negative      | Negative             | Negative                                               | Negative  |
| 2Ba2    | Negative                                       | Negative      | Negative             | Negative                                               | Negative  |
| 2Ba3    | Negative                                       | Negative      | Negative             | Negative                                               | Negative  |

| ID code | Carcinogenicity                                |               |                      | Mutagenicity                                           |           |
|---------|------------------------------------------------|---------------|----------------------|--------------------------------------------------------|-----------|
|         | Genotoxic Toxtree                              | Non-genotoxic | Tumorigenesis OSIRIS | Toxtree (Ames test)<br><i>S. typhimurium</i>           | OSIRIS    |
| 2Ba4    | Negative                                       | Negative      | Negative             | Negative                                               | Negative  |
| 2Ba5    | Negative                                       | Negative      | Negative             | Negative                                               | Negative  |
| 2Ba6    | Negative                                       | Negative      | Negative             | Negative                                               | Negative  |
| 2Ba6a   | Structural Alert for genotoxic carcinogenicity | Negative      | High risk            | Structural alert for <i>S.typhimurium</i> mutagenicity | High risk |
| 2Ca1    | Negative                                       | Negative      | Negative             | Negative                                               | Negative  |
| 3Aa1    | Negative                                       | Negative      | Negative             | Negative                                               | Negative  |
| 3Aa2    | Negative                                       | Negative      | Negative             | Negative                                               | Negative  |
| 3Aa3    | Negative                                       | Negative      | Negative             | Negative                                               | Negative  |
| 3Aa4    | Negative                                       | Negative      | Negative             | Negative                                               | Negative  |
| 3Aa5    | Negative                                       | Negative      | Negative             | Negative                                               | Negative  |
| 3Aa6    | Negative                                       | Negative      | Negative             | Negative                                               | Negative  |
| 3Aa7    | Negative                                       | Negative      | Negative             | Negative                                               | Negative  |
| 3Aa8    | Negative                                       | Negative      | Negative             | Negative                                               | Negative  |
| 3Aa9    | Negative                                       | Negative      | Negative             | Negative                                               | Negative  |
| 3Ab10   | Negative                                       | Negative      | Negative             | Negative                                               | Negative  |
| 3Ba1    | Negative                                       | Negative      | Negative             | Negative                                               | Negative  |
| 3Ba2    | Negative                                       | Negative      | Negative             | Negative                                               | Negative  |
| 3Ba3    | Negative                                       | Negative      | Negative             | Negative                                               | Negative  |
| 3Ba4    | Negative                                       | Negative      | Negative             | Negative                                               | Negative  |
| 3Ba5    | Negative                                       | Negative      | Negative             | Negative                                               | Negative  |
| 3Ba6    | Negative                                       | Negative      | Negative             | Negative                                               | Negative  |
| 3Bb7    | Negative                                       | Negative      | Negative             | Negative                                               | Negative  |
| 3Bb8    | Negative                                       | Negative      | Negative             | Negative                                               | Negative  |
| 4Aa1    | Structural Alert for genotoxic carcinogenicity | Negative      | High risk            | Structural alert for <i>S.typhimurium</i> mutagenicity | High risk |

| ID code | Carcinogenicity                                |               |                      | Mutagenicity                                           |           |
|---------|------------------------------------------------|---------------|----------------------|--------------------------------------------------------|-----------|
|         | Genotoxic Toxtree                              | Non-genotoxic | Tumorigenesis OSIRIS | Toxtree (Ames test)<br><i>S. typhimurium</i>           | OSIRIS    |
| 4Aa2    | Structural Alert for genotoxic carcinogenicity | Negative      | High risk            | Structural alert for <i>S.typhimurium</i> mutagenicity | High risk |
| 4Aa3    | Structural Alert for genotoxic carcinogenicity | Negative      | High risk            | Structural alert for <i>S.typhimurium</i> mutagenicity | High risk |
| 4Ab1    | Structural Alert for genotoxic carcinogenicity | Negative      | High risk            | Structural alert for <i>S.typhimurium</i> mutagenicity | High risk |
| 4Ab2    | Structural Alert for genotoxic carcinogenicity | Negative      | High risk            | Structural alert for <i>S.typhimurium</i> mutagenicity | High risk |
| 4Ac1    | Structural Alert for genotoxic carcinogenicity | Negative      | Medium risk          | Structural alert for <i>S.typhimurium</i> mutagenicity | High risk |
| 4Ad1    | Negative                                       | Negative      | High risk            | Negative                                               | High risk |
| 4Ad2    | Negative                                       | Negative      | High risk            | Negative                                               | High risk |
| 4Ad3    | Negative                                       | Negative      | High risk            | Negative                                               | High risk |
| 4Ae1    | Negative                                       | Negative      | Negative             | Negative                                               | High risk |
| 4Ae2    | Negative                                       | Negative      | Negative             | Negative                                               | High risk |
| 4Ba1    | Negative                                       | Negative      | Negative             | Negative                                               | Negative  |
| 4Ba2    | Negative                                       | Negative      | Negative             | Negative                                               | Negative  |
| 4Ba3    | Negative                                       | Negative      | Negative             | Negative                                               | Negative  |
| 4Ba4    | Negative                                       | Negative      | Negative             | Negative                                               | Negative  |
| 4Ba5    | Negative                                       | Negative      | Negative             | Negative                                               | Negative  |
| 4Ba6    | Negative                                       | Negative      | Negative             | Negative                                               | Negative  |
| 4Ba7    | Negative                                       | Negative      | Negative             | Negative                                               | Negative  |
| 4Ca1    | Negative                                       | Negative      | Negative             | Negative                                               | Negative  |
| 4Ca2    | Negative                                       | Negative      | Negative             | Negative                                               | Negative  |
| 4Ca3    | Negative                                       | Negative      | Negative             | Structural alert for <i>S.typhimurium</i> mutagenicity | Negative  |
| 4Ca4    | Negative                                       | Negative      | Negative             | Structural alert for <i>S.typhimurium</i> mutagenicity | Negative  |
| 4Cb1    | Negative                                       | Negative      | Negative             | Negative                                               | Negative  |

| ID code | Carcinogenicity                                |               |                      | Mutagenicity                                           |             |
|---------|------------------------------------------------|---------------|----------------------|--------------------------------------------------------|-------------|
|         | Genotoxic Toxtree                              | Non-genotoxic | Tumorigenesis OSIRIS | Toxtree (Ames test)<br><i>S. typhimurium</i>           | OSIRIS      |
| 4Cb2    | Negative                                       | Negative      | Negative             | Negative                                               | Negative    |
| 4Cb3    | Structural Alert for genotoxic carcinogenicity | Negative      | Medium risk          | Structural alert for <i>S.typhimurium</i> mutagenicity | Medium risk |
| 4Cb4    | Structural Alert for genotoxic carcinogenicity | Negative      | Medium risk          | Structural alert for <i>S.typhimurium</i> mutagenicity | High risk   |
| 4Cb5    | Negative                                       | Negative      | Negative             | Negative                                               | Negative    |
| 4Cb6    | Negative                                       | Negative      | Negative             | Negative                                               | Negative    |
| 4Cb7    | Negative                                       | Negative      | Negative             | Negative                                               | Negative    |
| 4Da1    | Negative                                       | Negative      | Negative             | Negative                                               | Negative    |
| 4Da2    | Negative                                       | Negative      | Negative             | Negative                                               | Negative    |
| 4Da3    | Negative                                       | Negative      | Negative             | Negative                                               | Negative    |
| 4Da4    | Negative                                       | Negative      | Negative             | Negative                                               | Negative    |
| 4Da5    | Negative                                       | Negative      | Negative             | Negative                                               | Negative    |
| 4Da6    | Negative                                       | Negative      | Negative             | Negative                                               | Negative    |
| 4Da7    | Negative                                       | Negative      | Negative             | Negative                                               | Negative    |
| 4Da8    | Structural Alert for genotoxic carcinogenicity | Negative      | Medium risk          | Structural alert for <i>S.typhimurium</i> mutagenicity | Medium risk |
| 4Da9    | Structural Alert for genotoxic carcinogenicity | Negative      | Medium risk          | Structural alert for <i>S.typhimurium</i> mutagenicity | Medium risk |
| 4Da10   | Negative                                       | Negative      | Negative             | Negative                                               | Negative    |
| 4Da11   | Negative                                       | Negative      | Negative             | Negative                                               | Negative    |
| 4Db1    | Structural Alert for genotoxic carcinogenicity | Negative      | Medium risk          | Structural alert for <i>S.typhimurium</i> mutagenicity | Medium risk |
| 4Db2    | Negative                                       | Negative      | Negative             | Negative                                               | Negative    |
| 4Db3    | Negative                                       | Negative      | Negative             | Negative                                               | Negative    |
| 4Db4    | Negative                                       | Negative      | Negative             | Negative                                               | Negative    |
| 4Db5    | Negative                                       | Negative      | Negative             | Negative                                               | Negative    |
| 4Db6    | Negative                                       | Negative      | Negative             | Negative                                               | Negative    |

| ID code | Carcinogenicity                                |               |                      | Mutagenicity                                           |           |
|---------|------------------------------------------------|---------------|----------------------|--------------------------------------------------------|-----------|
|         | Genotoxic Toxtree                              | Non-genotoxic | Tumorigenesis OSIRIS | Toxtree (Ames test)<br><i>S. typhimurium</i>           | OSIRIS    |
| 4Dc1    | Negative                                       | Negative      | Negative             | Negative                                               | Negative  |
| 4Dc2    | Negative                                       | Negative      | Negative             | Negative                                               | Negative  |
| 4Dc3    | Negative                                       | Negative      | Negative             | Negative                                               | Negative  |
| 4Dc4    | Negative                                       | Negative      | Negative             | Negative                                               | Negative  |
| 4Dc5    | Negative                                       | Negative      | Negative             | Negative                                               | Negative  |
| 4Dc6    | Negative                                       | Negative      | Negative             | Negative                                               | Negative  |
| 4Dc7    | Negative                                       | Negative      | Negative             | Negative                                               | Negative  |
| 4Dc8    | Negative                                       | Negative      | Negative             | Negative                                               | Negative  |
| 4Dd1.1  | Negative                                       | Negative      | Negative             | Negative                                               | Negative  |
| 4Dd1.2  | Negative                                       | Negative      | Negative             | Negative                                               | Negative  |
| 4Dd1.3  | Negative                                       | Negative      | Negative             | Negative                                               | Negative  |
| 4Dd1.4  | Negative                                       | Negative      | Negative             | Negative                                               | Negative  |
| 4Dd2.1  | Structural Alert for genotoxic carcinogenicity | Negative      | High risk            | Structural alert for <i>S.typhimurium</i> mutagenicity | High risk |
| 4Dd3.1  | Negative                                       | Negative      | Negative             | Negative                                               | Negative  |
| 4Dd4.1  | Negative                                       | Negative      | Negative             | Negative                                               | Negative  |
| 4Dd4.2  | Negative                                       | Negative      | Negative             | Negative                                               | Negative  |
| 4Dd4.3  | Negative                                       | Negative      | Negative             | Negative                                               | Negative  |
| 4Dd4.m  | Negative                                       | Negative      | Negative             | Negative                                               | Negative  |
| 5Aa1    | Negative                                       | Negative      | Negative             | Negative                                               | Negative  |
| 5Aa2    | Negative                                       | Negative      | Negative             | Negative                                               | Negative  |
| 5Aa3    | Negative                                       | Negative      | Negative             | Negative                                               | Negative  |
| 5Aa4    | Negative                                       | Negative      | Negative             | Negative                                               | Negative  |
| 5Ba1    | Negative                                       | Negative      | Negative             | Negative                                               | Negative  |
| 5Ba2    | Negative                                       | Negative      | Negative             | Negative                                               | Negative  |

| ID code | Carcinogenicity                                |                                                   |                      | Mutagenicity                                            |           |
|---------|------------------------------------------------|---------------------------------------------------|----------------------|---------------------------------------------------------|-----------|
|         | Genotoxic Toxtree                              | Non-genotoxic                                     | Tumorigenesis OSIRIS | Toxtree (Ames test)<br><i>S. typhimurium</i>            | OSIRIS    |
| 5Ca1    | Structural Alert for genotoxic carcinogenicity | Structural Alert for nongenotoxic carcinogenicity | High risk            | Structural alert for <i>S. typhimurium</i> mutagenicity | High risk |
| 5Ca2    | Structural Alert for genotoxic carcinogenicity | Structural Alert for nongenotoxic carcinogenicity | High risk            | Structural alert for <i>S. typhimurium</i> mutagenicity | High risk |
| 5Da1    | Negative                                       | Structural Alert for nongenotoxic carcinogenicity | Negative             | Negative                                                | Negative  |
| 5Da2    | Negative                                       | Structural Alert for nongenotoxic carcinogenicity | Negative             | Negative                                                | Negative  |
| 5Da3    | Negative                                       | Structural Alert for nongenotoxic carcinogenicity | Negative             | Negative                                                | Negative  |
| 5Ea1    | Negative                                       | Structural Alert for nongenotoxic carcinogenicity | Negative             | Negative                                                | Negative  |
| 5Ea2    | Negative                                       | Structural Alert for nongenotoxic carcinogenicity | Negative             | Negative                                                | Negative  |
| 5Ea3    | Negative                                       | Structural Alert for nongenotoxic carcinogenicity | Negative             | Negative                                                | Negative  |

**Table S8.** Toxicity (III). Irritant/corrosive effect on the skin and eyes, effect on the reproductive system, biodegradability, protein and DNA binding alerts, assessed using Toxtree and OSIRIS.

| ID code | Irritation/corrosion        |                   |          | Effect on the reproductive system | Biodegradability                       | Protein binding Alerts | DNA binding Alerts |
|---------|-----------------------------|-------------------|----------|-----------------------------------|----------------------------------------|------------------------|--------------------|
|         | Skin                        | Eye               | OSIRIS   | OSIRIS                            |                                        |                        |                    |
| 1Aa1    | Not irritating or corrosive | Negative          | Negative | Negative                          | Class1 (easily biodegradable chemical) | Negative               | Negative           |
| 1Aa2    | Unknown                     | Unknown           | Negative | Negative                          | Class1 (easily biodegradable chemical) | Negative               | Negative           |
| 1Aa3    | Unknown                     | Unknown           | Negative | Negative                          | Class1 (easily biodegradable chemical) | Negative               | Negative           |
| 1Aa4    | Unknown                     | Unknown           | Negative | Negative                          | Class1 (easily biodegradable chemical) | Negative               | Negative           |
| 1Aa5    | Unknown                     | Unknown           | Negative | Negative                          | Class1 (easily biodegradable chemical) | Negative               | Negative           |
| 1Aa6    | Unknown                     | Unknown           | Negative | Negative                          | Class1 (easily biodegradable chemical) | Negative               | Negative           |
| 1Aa7    | Unknown                     | Unknown           | Negative | Negative                          | Class1 (easily biodegradable chemical) | Negative               | Negative           |
| 1Aa8    | Unknown                     | Unknown           | Negative | Negative                          | Class1 (easily biodegradable chemical) | Negative               | Negative           |
| 1Ba1    | Not irritating or corrosive | No skin corrosion | Negative | Negative                          | Class1 (easily biodegradable chemical) | Negative               | Negative           |
| 1Ba2    | Unknown                     | Unknown           | Negative | Negative                          | Class1 (easily biodegradable chemical) | Negative               | Negative           |
| 1Ba3    | Unknown                     | Unknown           | Negative | Negative                          | Class1 (easily biodegradable chemical) | Negative               | Negative           |



| ID code | Irritation/corrosion |         |             | Effect on the reproductive system | Biodegradability                       | Protein binding Alerts                   | DNA binding Alerts                       |
|---------|----------------------|---------|-------------|-----------------------------------|----------------------------------------|------------------------------------------|------------------------------------------|
|         | Skin                 | Eye     | OSIRIS      | OSIRIS                            |                                        |                                          |                                          |
|         |                      |         |             |                                   | chemical)                              |                                          |                                          |
| 1Ca1    | Unknown              | Unknown | Medium risk | Negative                          | Class1 (easily biodegradable chemical) | Alert for acyl transfer agent identified | Alert for acyl transfer agent identified |
| 1Ca2    | Unknown              | Unknown | Medium risk | Negative                          | Class1 (easily biodegradable chemical) | Alert for acyl transfer agent identified | Alert for acyl transfer agent identified |
| 1Ca3    | Unknown              | Unknown | Medium risk | Negative                          | Class1 (easily biodegradable chemical) | Alert for acyl transfer agent identified | Alert for acyl transfer agent identified |
| 1Da1    | Unknown              | Unknown | High risk   | Negative                          | Class1 (easily biodegradable chemical) | Alert for acyl transfer agent identified | Negative                                 |
| 1Da2    | Unknown              | Unknown | High risk   | Negative                          | Class1 (easily biodegradable chemical) | Alert for acyl transfer agent identified | Negative                                 |
| 1Da3    | Unknown              | Unknown | High risk   | Negative                          | Class1 (easily biodegradable chemical) | Alert for acyl transfer agent identified | Negative                                 |
| 1Da4    | Unknown              | Unknown | High risk   | Negative                          | Class1 (easily biodegradable chemical) | Alert for acyl transfer agent identified | Negative                                 |
| 2Aa1    | Unknown              | Unknown | Negative    | Negative                          | Class1 (easily biodegradable chemical) | Negative                                 | Negative                                 |
| 2Ba1    | Unknown              | Unknown | Negative    | Negative                          | Class1 (easily biodegradable chemical) | Negative                                 | Negative                                 |
| 2Ba2    | Unknown              | Unknown | Negative    | Negative                          | Class2 (persistent chemical)           | Negative                                 | Alert for SN1 identified                 |
| 2Ba3    | Unknown              | Unknown | Negative    | Negative                          | Class1 (easily biodegradable chemical) | Negative                                 | Negative                                 |
| 2Ba4    | Unknown              | Unknown | Negative    | Negative                          | Class1 (easily                         | Negative                                 | Negative                                 |

| ID code | Irritation/corrosion        |                            |          | Effect on the reproductive system | Biodegradability                       | Protein binding Alerts                   | DNA binding Alerts                                                    |
|---------|-----------------------------|----------------------------|----------|-----------------------------------|----------------------------------------|------------------------------------------|-----------------------------------------------------------------------|
|         | Skin                        | Eye                        | OSIRIS   | OSIRIS                            |                                        |                                          |                                                                       |
|         |                             |                            |          |                                   | biodegradable chemical)                |                                          |                                                                       |
| 2Ba5    | Unknown                     | Unknown                    | Negative | Negative                          | Class2 (persistent chemical)           | Negative                                 | Alert for SN1 identified                                              |
| 2Ba6    | Unknown                     | Unknown                    | Negative | Negative                          | Class2 (persistent chemical)           | Negative                                 | Alert for SN1 identified                                              |
| 2Ba6a   | Unknown                     | Unknown                    | Negative | High risk                         | Class2 (persistent chemical)           | Alert for SN2 identified                 | Alert for SN1 and SN2 identified                                      |
| 2Ca1    | Irritating to skin          | Unknown                    | Negative | Negative                          | Class1 (easily biodegradable chemical) | Negative                                 | Negative                                                              |
| 3Aa1    | Not irritating              | Unknown                    | Negative | Negative                          | Class2 (persistent chemical)           | Negative                                 | Alert for SN1 identified. Alert for Schiff base formation identified. |
| 3Aa2    | Unknown                     | Unknown                    | Negative | Negative                          | Class1 (easily biodegradable chemical) | Negative                                 | Alert for SN1 identified                                              |
| 3Aa3    | Not irritating or corrosive | No skin corrosion          | Negative | Negative                          | Class1 (easily biodegradable chemical) | Negative                                 | Negative                                                              |
| 3Aa4    | Not irritating              | No skin corrosion          | Negative | Negative                          | Class1 (easily biodegradable chemical) | Alert for acyl transfer agent identified | Alert for SN1 identified                                              |
| 3Aa5    | Not irritating              | Serious lesions to the eye | Negative | Negative                          | Class1 (easily biodegradable chemical) | Negative                                 | Negative                                                              |
| 3Aa6    | Not irritating              | Unknown                    | Negative | Negative                          | Class1 (easily biodegradable chemical) | Alert for acyl transfer agent identified | Alert for SN1 identified                                              |
| 3Aa7    | Not irritating              | Unknown                    | Negative | Negative                          | Class2 (persistent chemical)           | Alert for acyl transfer agent identified | Alert for Schiff base formation identified                            |

| ID code | Irritation/corrosion        |                            |           | Effect on the reproductive system | Biodegradability                       | Protein binding Alerts                                                                               | DNA binding Alerts                                                                      |
|---------|-----------------------------|----------------------------|-----------|-----------------------------------|----------------------------------------|------------------------------------------------------------------------------------------------------|-----------------------------------------------------------------------------------------|
|         | Skin                        | Eye                        | OSIRIS    | OSIRIS                            |                                        |                                                                                                      |                                                                                         |
| 3Aa8    | Not irritating              | Serious lesions to the eye | Negative  | Negative                          | Class2 (persistent chemical)           | Alert for SN2 identified Nucleophilic Aliphatic Substitution                                         | Alert for Schiff base formation identified                                              |
| 3Aa9    | Unknown                     | Unknown                    | High risk | Negative                          | Class2 (persistent chemical)           | Alert for acyl transfer agent identified                                                             | Alert for SN1 identified                                                                |
| 3Ab10   | Not irritating              | Unknown                    | High risk | Negative                          | Class2 (persistent chemical)           | Alert for acyl transfer agent identified                                                             | Alert for SN1 identified. Alert for Schiff base formation identified.                   |
| 3Ba1    | Unknown                     | Unknown                    | Negative  | Negative                          | Class2 (persistent chemical)           | Negative                                                                                             | Alert for SN1 identified                                                                |
| 3Ba2    | Not irritating or corrosive | No skin corrosion          | Negative  | Negative                          | Class1 (easily biodegradable chemical) | Negative                                                                                             | Negative                                                                                |
| 3Ba3    | Unknown                     | Unknown                    | Negative  | Negative                          | Class1 (easily biodegradable chemical) | Negative                                                                                             | Negative                                                                                |
| 3Ba4    | Not irritating or corrosive | No skin corrosion          | Negative  | Negative                          | Class1 (easily biodegradable chemical) | Negative                                                                                             | Negative                                                                                |
| 3Ba5    | Irritating or corrosive     | Unknown                    | Negative  | Negative                          | Class2 (persistent chemical)           | Negative                                                                                             | Alert for SN1 identified                                                                |
| 3Ba6    | Unknown                     | Unknown                    | Negative  | Negative                          | Class2 (persistent chemical)           | Alert for acyl transfer agent identified                                                             | Negative                                                                                |
| 3Bb7    | Unknown                     | Unknown                    | High risk | Negative                          | Class2 (persistent chemical)           | Alert for acyl transfer agent identified                                                             | Alert for SN1 identified                                                                |
| 3Bb8    | Unknown                     | Unknown                    | High risk | Negative                          | Class2 (persistent chemical)           | Alert for acyl transfer agent identified                                                             | Alert for SN1 identified                                                                |
| 4Aa1    | Unknown                     | Unknown                    | Negative  | High risk                         | Class2 (persistent chemical)           | Alert for Michael Acceptor identified. Alert for SN2 identified. Nucleophilic Aliphatic Substitution | Alert for Michael Acceptor identified. Alert for SN2 identified. Nucleophilic Aliphatic |

| ID code | Irritation/corrosion        |                   |             | Effect on the reproductive system | Biodegradability                       | Protein binding Alerts                                                                               | DNA binding Alerts                                                                                   |
|---------|-----------------------------|-------------------|-------------|-----------------------------------|----------------------------------------|------------------------------------------------------------------------------------------------------|------------------------------------------------------------------------------------------------------|
|         | Skin                        | Eye               | OSIRIS      | OSIRIS                            |                                        |                                                                                                      |                                                                                                      |
|         |                             |                   |             |                                   |                                        |                                                                                                      | Substitution                                                                                         |
| 4Aa2    | Unknown                     | Unknown           | Negative    | High risk                         | Class2 (persistent chemical)           | Alert for Michael Acceptor identified. Alert for SN2 identified. Nucleophilic Aliphatic Substitution | Alert for Michael Acceptor identified. Alert for SN2 identified. Nucleophilic Aliphatic Substitution |
| 4Aa3    | Unknown                     | Unknown           | Negative    | High risk                         | Class2 (persistent chemical)           | Alert for SN2 identified.- Nucleophilic Aliphatic Substitution                                       | Alert for SN1 and SN2 identified                                                                     |
| 4Ab1    | Unknown                     | Unknown           | High risk   | Medium risk                       | Class2 (persistent chemical)           | Alert for SN2 identified.- Nucleophilic Aliphatic Substitution                                       | Alert for SN2 identified.- Nucleophilic Aliphatic Substitution                                       |
| 4Ab2    | Not irritating or corrosive | No skin corrosion | Medium risk | Medium risk                       | Class2 (persistent chemical)           | Negative                                                                                             | Negative                                                                                             |
| 4Ac1    | Unknown                     | Unknown           | Negative    | Medium risk                       | Class1 (easily biodegradable chemical) | Negative                                                                                             | Negative                                                                                             |
| 4Ad1    | Not irritating              | No skin corrosion | Negative    | Medium risk                       | Class3 (Unknown biodegradability)      | Alert for SN2 identified.- Nucleophilic Aliphatic Substitution                                       | Alert for SN2 identified.- Nucleophilic Aliphatic Substitution                                       |
| 4Ad2    | Not irritating              | No skin corrosion | Negative    | Negative                          | Class3 (Unknown biodegradability)      | Alert for SN2 identified.- Nucleophilic Aliphatic Substitution                                       | Alert for SN2 identified.- Nucleophilic Aliphatic Substitution                                       |
| 4Ad3    | Not irritating              | Unknown           | Negative    | Medium risk                       | Class3 (Unknown biodegradability)      | Alert for SN2 identified.- Nucleophilic Aliphatic Substitution                                       | Alert for SN2 identified.- Nucleophilic Aliphatic                                                    |

| ID code | Irritation/corrosion        |                   |             | Effect on the reproductive system | Biodegradability                       | Protein binding Alerts                                         | DNA binding Alerts       |
|---------|-----------------------------|-------------------|-------------|-----------------------------------|----------------------------------------|----------------------------------------------------------------|--------------------------|
|         | Skin                        | Eye               | OSIRIS      | OSIRIS                            |                                        |                                                                |                          |
|         |                             |                   |             |                                   |                                        |                                                                | Substitution             |
| 4Ae1    | Unknown                     | Unknown           | Negative    | Negative                          | Class3 (Unknown biodegradability)      | Negative                                                       | Negative                 |
| 4Ae2    | Unknown                     | Unknown           | Negative    | Negative                          | Class2 (persistent chemical)           | Negative                                                       | Negative                 |
| 4Ba1    | Not irritating or corrosive | No skin corrosion | Medium risk | Negative                          | Class1 (easily biodegradable chemical) | Negative                                                       | Negative                 |
| 4Ba2    | Unknown                     | Unknown           | Negative    | Negative                          | Class1 (easily biodegradable chemical) | Negative                                                       | Negative                 |
| 4Ba3    | Unknown                     | Unknown           | Negative    | Negative                          | Class1 (easily biodegradable chemical) | Negative                                                       | Negative                 |
| 4Ba4    | Unknown                     | Unknown           | Medium risk | Negative                          | Class1 (easily biodegradable chemical) | Negative                                                       | Negative                 |
| 4Ba5    | Unknown                     | Unknown           | Negative    | Negative                          | Class1 (easily biodegradable chemical) | Negative                                                       | Negative                 |
| 4Ba6    | Unknown                     | Unknown           | Medium risk | Negative                          | Class1 (easily biodegradable chemical) | Negative                                                       | Alert for SN1 identified |
| 4Ba7    | Unknown                     | Unknown           | Negative    | Negative                          | Class1 (easily biodegradable chemical) | Alert for SN2 identified.- Nucleophilic Aliphatic Substitution | Alert for SN1 identified |
| 4Ca1    | Unknown                     | Unknown           | Negative    | Negative                          | Class1 (easily biodegradable chemical) | Negative                                                       | Negative                 |
| 4Ca2    | Unknown                     | Unknown           | Negative    | Negative                          | Class1 (easily biodegradable chemical) | Negative                                                       | Negative                 |
| 4Ca3    | Unknown                     | Unknown           | Negative    | Negative                          | Class1 (easily                         | Negative                                                       | Negative                 |

| ID code | Irritation/corrosion        |                   |          | Effect on the reproductive system | Biodegradability                       | Protein binding Alerts                                         | DNA binding Alerts                                             |
|---------|-----------------------------|-------------------|----------|-----------------------------------|----------------------------------------|----------------------------------------------------------------|----------------------------------------------------------------|
|         | Skin                        | Eye               | OSIRIS   | OSIRIS                            |                                        |                                                                |                                                                |
|         |                             |                   |          |                                   | biodegradable chemical)                |                                                                |                                                                |
| 4Ca4    | Unknown                     | Unknown           | Negative | Negative                          | Class1 (easily biodegradable chemical) | Negative                                                       | Negative                                                       |
| 4Cb1    | Unknown                     | Unknown           | Negative | Negative                          | Class1 (easily biodegradable chemical) | Negative                                                       | Negative                                                       |
| 4Cb2    | Not irritating or corrosive | No skin corrosion | Negative | Negative                          | Class1 (easily biodegradable chemical) | Negative                                                       | Negative                                                       |
| 4Cb3    | Unknown                     | Unknown           | Negative | High risk                         | Class1 (easily biodegradable chemical) | Alert for SN2 identified.- Nucleophilic Aliphatic Substitution | Alert for SN2 identified.- Nucleophilic Aliphatic Substitution |
| 4Cb4    | Unknown                     | Unknown           | Negative | High risk                         | Class1 (easily biodegradable chemical) | Alert for SN2 identified.- Nucleophilic Aliphatic Substitution | Alert for SN1 and SN2 identified                               |
| 4Cb5    | Unknown                     | Unknown           | Negative | Negative                          | Class1 (easily biodegradable chemical) | Negative                                                       | Negative                                                       |
| 4Cb6    | Not irritating or corrosive | No skin corrosion | Negative | Negative                          | Class1 (easily biodegradable chemical) | Negative                                                       | Negative                                                       |
| 4Cb7    | Unknown                     | Unknown           | Negative | Negative                          | Class1 (easily biodegradable chemical) | Negative                                                       | Negative                                                       |
| 4Da1    | Not irritating              | No skin corrosion | Negative | Negative                          | Class1 (easily biodegradable chemical) | Negative                                                       | Negative                                                       |
| 4Da2    | Not irritating              | No skin corrosion | Negative | Medium risk                       | Class1 (easily biodegradable chemical) | Alert for SN2 identified.- Nucleophilic Aliphatic Substitution | Negative                                                       |

| ID code | Irritation/corrosion        |                            |          | Effect on the reproductive system | Biodegradability                       | Protein binding Alerts                                         | DNA binding Alerts                                             |
|---------|-----------------------------|----------------------------|----------|-----------------------------------|----------------------------------------|----------------------------------------------------------------|----------------------------------------------------------------|
|         | Skin                        | Eye                        | OSIRIS   | OSIRIS                            |                                        |                                                                |                                                                |
| 4Da3    | Not irritating              | No skin corrosion          | Negative | Medium risk                       | Class1 (easily biodegradable chemical) | Alert for SN2 identified.- Nucleophilic Aliphatic Substitution | Negative                                                       |
| 4Da4    | Not irritating              | No skin corrosion          | Negative | Negative                          | Class1 (easily biodegradable chemical) | Negative                                                       | Negative                                                       |
| 4Da5    | Not irritating or corrosive | No skin corrosion          | Negative | Medium risk                       | Class1 (easily biodegradable chemical) | Negative                                                       | Negative                                                       |
| 4Da6    | Not irritating or corrosive | No skin corrosion          | Negative | Medium risk                       | Class1 (easily biodegradable chemical) | Negative                                                       | Negative                                                       |
| 4Da7    | Not irritating              | No skin corrosion          | Negative | Medium risk                       | Class1 (easily biodegradable chemical) | Negative                                                       | Negative                                                       |
| 4Da8    | Not irritating              | Unknown                    | Negative | High risk                         | Class1 (easily biodegradable chemical) | Alert for SN2 identified.- Nucleophilic Aliphatic Substitution | Alert for SN1 and SN2 identified                               |
| 4Da9    | Not irritating              | Unknown                    | Negative | High risk                         | Class1 (easily biodegradable chemical) | Alert for SN2 identified.- Nucleophilic Aliphatic Substitution | Alert for SN2 identified.- Nucleophilic Aliphatic Substitution |
| 4Da10   | Not irritating              | No skin corrosion          | Negative | Medium risk                       | Class1 (easily biodegradable chemical) | Negative                                                       | Negative                                                       |
| 4Da11   | Not irritating              | Unknown                    | Negative | Medium risk                       | Class1 (easily biodegradable chemical) | Negative                                                       | Negative                                                       |
| 4Db1    | Unknown                     | Serious lesions to the eye | Negative | High risk                         | Class1 (easily biodegradable chemical) | Alert for SN2 identified.- Nucleophilic Aliphatic Substitution | Alert for SN2 identified.- Nucleophilic Aliphatic Substitution |

| ID code | Irritation/corrosion        |                            |          | Effect on the reproductive system | Biodegradability                       | Protein binding Alerts | DNA binding Alerts |
|---------|-----------------------------|----------------------------|----------|-----------------------------------|----------------------------------------|------------------------|--------------------|
|         | Skin                        | Eye                        | OSIRIS   | OSIRIS                            |                                        |                        |                    |
| 4Db2    | Not irritating or corrosive | No skin corrosion          | Negative | Medium risk                       | Class1 (easily biodegradable chemical) | Negative               | Negative           |
| 4Db3    | Unknown                     | Unknown                    | Negative | Medium risk                       | Class1 (easily biodegradable chemical) | Negative               | Negative           |
| 4Db4    | Not irritating or corrosive | No skin corrosion          | Negative | Medium risk                       | Class1 (easily biodegradable chemical) | Negative               | Negative           |
| 4Db5    | Unknown                     | Unknown                    | Negative | Medium risk                       | Class1 (easily biodegradable chemical) | Negative               | Negative           |
| 4Db6    | Unknown                     | Unknown                    | Negative | Medium risk                       | Class1 (easily biodegradable chemical) | Negative               | Negative           |
| 4Dc1    | Unknown                     | Unknown                    | Negative | Negative                          | Class3 (Unknown biodegradability)      | Negative               | Negative           |
| 4Dc2    | Unknown                     | Unknown                    | Negative | Negative                          | Class3 (Unknown biodegradability)      | Negative               | Negative           |
| 4Dc3    | Unknown                     | Unknown                    | Negative | Medium risk                       | Class3 (Unknown biodegradability)      | Negative               | Negative           |
| 4Dc4    | Unknown                     | Serious lesions to the eye | Negative | Medium risk                       | Class3 (Unknown biodegradability)      | Negative               | Negative           |
| 4Dc5    | Unknown                     | Serious lesions to the eye | Negative | Negative                          | Class3 (Unknown biodegradability)      | Negative               | Negative           |
| 4Dc6    | Not irritating or corrosive | No skin corrosion          | Negative | Negative                          | Class1 (easily biodegradable chemical) | Negative               | Negative           |
| 4Dc7    | Not irritating or corrosive | No skin corrosion          | Negative | Negative                          | Class1 (easily biodegradable)          | Negative               | Negative           |



| ID code | Irritation/corrosion        |                   |           | Effect on the reproductive system | Biodegradability                       | Protein binding Alerts                                           | DNA binding Alerts         |
|---------|-----------------------------|-------------------|-----------|-----------------------------------|----------------------------------------|------------------------------------------------------------------|----------------------------|
|         | Skin                        | Eye               | OSIRIS    | OSIRIS                            |                                        |                                                                  |                            |
|         |                             |                   |           |                                   | chemical)                              |                                                                  |                            |
| 4Dc8    | Not irritating or corrosive | No skin corrosion | Negative  | Negative                          | Class3 (Unknown biodegradability)      | Negative                                                         | Negative                   |
| 4Dd1.1  | Unknown                     | Unknown           | Negative  | Negative                          | Class1 (easily biodegradable chemical) | Negative                                                         | Negative                   |
| 4Dd1.2  | Not irritating or corrosive | No skin corrosion | Negative  | Negative                          | Class1 (easily biodegradable chemical) | Negative                                                         | Negative                   |
| 4Dd1.3  | Unknown                     | Unknown           | Negative  | Negative                          | Class1 (easily biodegradable chemical) | Negative                                                         | Negative                   |
| 4Dd1.4  | Unknown                     | Unknown           | Negative  | Negative                          | Class1 (easily biodegradable chemical) | Negative                                                         | Negative                   |
| 4Dd2.1  | Not irritating or corrosive | No skin corrosion | High risk | Medium risk                       | Class2 (persistent chemical)           | Negative                                                         | Negative                   |
| 4Dd3.1  | Unknown                     | Unknown           | Negative  | Negative                          | Class2 (persistent chemical)           | Negative                                                         | Negative                   |
| 4Dd4.1  | Not irritating or corrosive | No skin corrosion | Negative  | Negative                          | Class1 (easily biodegradable chemical) | Alert for acyl transfer agent identified                         | Negative                   |
| 4Dd4.2  | Not irritating or corrosive | No skin corrosion | Negative  | Negative                          | Class1 (easily biodegradable chemical) | Alert for acyl transfer agent identified                         | Negative                   |
| 4Dd4.3  | Not irritating or corrosive | No skin corrosion | Negative  | Negative                          | Class1 (easily biodegradable chemical) | Alert for acyl transfer agent identified                         | Negative                   |
| 4Dd4.m  | Not irritating or corrosive | No skin corrosion | Negative  | Negative                          | Class1 (easily biodegradable chemical) | Alert for acyl transfer agent identified                         | Negative                   |
| 5Aa1    | Not corrosive               | No skin corrosion | Negative  | High risk                         | Class2 (persistent chemical)           | Alert for Michael Acceptor identified. Alert for SN2 identified. | Alert for Michael Acceptor |

| ID code | Irritation/corrosion |                   |           | Effect on the reproductive system | Biodegradability             | Protein binding Alerts                                                                                                                         | DNA binding Alerts                                               |
|---------|----------------------|-------------------|-----------|-----------------------------------|------------------------------|------------------------------------------------------------------------------------------------------------------------------------------------|------------------------------------------------------------------|
|         | Skin                 | Eye               | OSIRIS    | OSIRIS                            |                              |                                                                                                                                                |                                                                  |
|         |                      |                   |           |                                   |                              | Nucleophilic Aliphatic Substitution                                                                                                            | identified.                                                      |
| 5Aa2    | Not corrosive        | No skin corrosion | Negative  | High risk                         | Class2 (persistent chemical) | Alert for Michael Acceptor identified. Alert for SN2 identified. Nucleophilic Aliphatic Substitution                                           | Alert for SN1 identified. Alert for Michael Acceptor identified. |
| 5Aa3    | Not corrosive        | No skin corrosion | Negative  | High risk                         | Class2 (persistent chemical) | Alert for Michael Acceptor identified. Alert for SN2 identified. Nucleophilic Aliphatic Substitution                                           | Alert for Michael Acceptor identified                            |
| 5Aa4    | Not corrosive        | No skin corrosion | Negative  | High risk                         | Class2 (persistent chemical) | Alert for Michael Acceptor identified. Alert for SN2 identified. Nucleophilic Aliphatic Substitution                                           | Alert for Michael Acceptor identified                            |
| 5Ba1    | Not corrosive        | No eye irritation | Negative  | Negative                          | Class2 (persistent chemical) | Alert for Michael Acceptor identified. Alert for SN2 identified. Nucleophilic Aliphatic Substitution. Alert for acyl transfer agent identified | Alert for SN1 identified. Alert for Michael Acceptor identified. |
| 5Ba2    | Not corrosive        | No eye irritation | Negative  | Negative                          | Class2 (persistent chemical) | Alert for Michael Acceptor identified. Alert for SN2 identified. Nucleophilic Aliphatic Substitution. Alert for acyl transfer agent identified | Alert for SN1 identified. Alert for Michael Acceptor identified. |
| 5Ca1    | Not corrosive        | No skin corrosion | High risk | High risk                         | Class2 (persistent chemical) | Alert for Michael Acceptor identified. Alert for SN2 identified. Nucleophilic Aliphatic Substitution. Alert for acyl transfer agent identified | Alert for SN1 identified. Alert for Michael Acceptor identified. |
| 5Ca2    | Not corrosive        | No skin corrosion | High risk | High risk                         | Class2 (persistent chemical) | Alert for Michael Acceptor identified. Alert for SN2 identified. Nucleophilic Aliphatic Substitution. Alert for acyl transfer agent identified | Alert for SN1 identified. Alert for Michael Acceptor identified. |
| 5Da1    | Not corrosive        | No skin corrosion | Negative  | Negative                          | Class2 (persistent chemical) | Alert for Michael Acceptor identified. Alert for SN2 identified.                                                                               | Alert for SN1 identified. Alert                                  |

| ID code | Irritation/corrosion        |                   |          | Effect on the reproductive system | Biodegradability             | Protein binding Alerts                                                                               | DNA binding Alerts                                               |
|---------|-----------------------------|-------------------|----------|-----------------------------------|------------------------------|------------------------------------------------------------------------------------------------------|------------------------------------------------------------------|
|         | Skin                        | Eye               | OSIRIS   | OSIRIS                            |                              |                                                                                                      |                                                                  |
|         |                             |                   |          |                                   |                              | Nucleophilic Aliphatic Substitution                                                                  | for Michael Acceptor identified.                                 |
| 5Da2    | Not corrosive               | No skin corrosion | Negative | Negative                          | Class2 (persistent chemical) | Alert for Michael Acceptor identified. Alert for SN2 identified. Nucleophilic Aliphatic Substitution | Alert for SN1 identified. Alert for Michael Acceptor identified. |
| 5Da3    | Not corrosive               | No skin corrosion | Negative | Negative                          | Class2 (persistent chemical) | Alert for Michael Acceptor identified. Alert for SN2 identified. Nucleophilic Aliphatic Substitution | Alert for SN1 identified. Alert for Michael Acceptor identified. |
| 5Ea1    | Not corrosive               | No skin corrosion | Negative | Negative                          | Class2 (persistent chemical) | Alert for Michael Acceptor identified. Alert for SN2 identified. Nucleophilic Aliphatic Substitution | Alert for Michael Acceptor identified                            |
| 5Ea2    | Not corrosive               | No skin corrosion | Negative | Negative                          | Class2 (persistent chemical) | Alert for Michael Acceptor identified. Alert for SN2 identified. Nucleophilic Aliphatic Substitution | Alert for Michael Acceptor identified                            |
| 5Ea3    | Not irritating or corrosive | No skin corrosion | Negative | Negative                          | Class2 (persistent chemical) | Alert for Michael Acceptor identified. Alert for SN2 identified. Nucleophilic Aliphatic Substitution | Alert for Michael Acceptor identified                            |

**Table S9.** Permeability and interactions with P-gp. Enzyme inhibitory effect on isoforms of cytochrome P450.

| ID code | GI absorption | BBB permeant | P-gp substrate | CYP1A2 inhibitor | CYP2C19 inhibitor | CYP2C9 inhibitor | CYP2D6 inhibitor | CYP3A4 inhibitor | log Kp (cm/s) |
|---------|---------------|--------------|----------------|------------------|-------------------|------------------|------------------|------------------|---------------|
| 1Aa1    | High          | No           | No             | No               | No                | No               | No               | No               | -8.92         |
| 1Aa2    | High          | No           | No             | No               | No                | No               | No               | No               | -9.71         |
| 1Aa3    | High          | No           | No             | No               | No                | No               | No               | No               | -8.75         |
| 1Aa4    | High          | No           | No             | No               | No                | No               | No               | No               | -9.53         |
| 1Aa5    | High          | No           | No             | No               | No                | No               | No               | No               | -9.67         |
| 1Aa6    | High          | No           | No             | No               | No                | No               | No               | No               | -9.67         |
| 1Aa7    | High          | No           | No             | No               | No                | No               | No               | No               | -9.5          |
| 1Aa8    | High          | No           | No             | No               | No                | No               | No               | No               | -9.37         |
| 1Ba1    | High          | No           | No             | No               | No                | No               | No               | No               | -9.43         |
| 1Ba2    | High          | No           | No             | No               | No                | No               | No               | No               | -8.26         |
| 1Ba3    | High          | No           | No             | No               | No                | No               | No               | No               | -10.27        |
| 1Ca1    | High          | No           | No             | No               | No                | No               | No               | No               | -9.23         |
| 1Ca2    | High          | No           | No             | No               | No                | No               | No               | No               | -6.9          |
| 1Ca3    | High          | No           | No             | No               | No                | No               | No               | No               | -9.23         |
| 1Da1    | High          | No           | No             | No               | No                | No               | No               | No               | -9.77         |
| 1Da2    | High          | No           | No             | No               | No                | No               | No               | No               | -10           |
| 1Da3    | High          | No           | No             | No               | No                | No               | No               | No               | -9.87         |
| 1Da4    | High          | No           | No             | No               | No                | No               | No               | No               | -7.73         |
| 2Aa1    | High          | No           | No             | No               | No                | No               | No               | No               | -8.75         |
| 2Ba1    | High          | No           | No             | No               | No                | No               | No               | No               | -9.41         |
| 2Ba2    | High          | No           | No             | No               | No                | No               | No               | No               | -9.16         |
| 2Ba3    | High          | No           | No             | No               | No                | No               | No               | No               | -7.63         |
| 2Ba4    | High          | No           | No             | No               | No                | No               | No               | No               | -9.24         |
| 2Ba5    | High          | No           | No             | No               | No                | No               | No               | No               | -8.82         |
| 2Ba6    | High          | No           | No             | No               | No                | No               | No               | No               | -8.99         |



| ID code | GI absorption | BBB permeant | P-gp substrate | CYP1A2 inhibitor | CYP2C19 inhibitor | CYP2C9 inhibitor | CYP2D6 inhibitor | CYP3A4 inhibitor | log Kp (cm/s) |
|---------|---------------|--------------|----------------|------------------|-------------------|------------------|------------------|------------------|---------------|
| 4Ad1    | High          | No           | No             | No               | No                | No               | No               | No               | -8.77         |
| 4Ad2    | High          | No           | No             | No               | No                | No               | No               | No               | -9.09         |
| 4Ad3    | High          | No           | No             | No               | No                | No               | No               | No               | -8.75         |
| 4Ae1    | High          | Yes          | No             | No               | No                | No               | No               | No               | -9.39         |
| 4Ae2    | High          | No           | No             | No               | No                | No               | No               | No               | -9.2          |
| 4Ba1    | Low           | No           | No             | No               | No                | No               | No               | No               | -9.71         |
| 4Ba2    | High          | No           | No             | No               | No                | No               | No               | No               | -9.8          |
| 4Ba3    | High          | No           | No             | No               | No                | No               | No               | No               | -7.77         |
| 4Ba4    | High          | No           | No             | No               | No                | No               | No               | No               | -9.94         |
| 4Ba5    | High          | No           | No             | No               | No                | No               | No               | No               | -10.04        |
| 4Ba6    | High          | No           | No             | No               | No                | No               | No               | No               | -7.83         |
| 4Ba7    | High          | No           | No             | No               | No                | No               | No               | No               | -8.17         |
| 4Ca1    | High          | No           | No             | No               | No                | No               | No               | No               | -7.8          |
| 4Ca2    | High          | No           | No             | No               | No                | No               | No               | No               | -7.95         |
| 4Ca3    | High          | No           | No             | No               | No                | No               | No               | No               | -7.87         |
| 4Ca4    | High          | No           | No             | No               | No                | No               | No               | No               | -8.02         |
| 4Cb1    | High          | No           | No             | No               | No                | No               | No               | No               | -8.05         |
| 4Cb2    | High          | No           | No             | No               | No                | No               | No               | No               | -10.1         |
| 4Cb3    | High          | No           | No             | No               | No                | No               | No               | No               | -10.23        |
| 4Cb4    | High          | No           | No             | No               | No                | No               | No               | No               | -9.85         |
| 4Cb5    | High          | No           | No             | No               | No                | No               | No               | No               | -7.88         |
| 4Cb6    | High          | No           | No             | No               | No                | No               | No               | No               | -10.32        |
| 4Cb7    | High          | No           | No             | No               | No                | No               | No               | No               | -9.93         |
| 4Da1    | High          | No           | No             | No               | No                | No               | No               | No               | -10.18        |
| 4Da2    | High          | No           | No             | No               | No                | No               | No               | No               | -9.31         |
| 4Da3    | High          | No           | No             | No               | No                | No               | No               | No               | -9.28         |

| ID code | GI absorption | BBB permeant | P-gp substrate | CYP1A2 inhibitor | CYP2C19 inhibitor | CYP2C9 inhibitor | CYP2D6 inhibitor | CYP3A4 inhibitor | log Kp (cm/s) |
|---------|---------------|--------------|----------------|------------------|-------------------|------------------|------------------|------------------|---------------|
| 4Da4    | High          | No           | No             | No               | No                | No               | No               | No               | -9.84         |
| 4Da5    | High          | No           | No             | No               | No                | No               | No               | No               | -9.2          |
| 4Da6    | High          | No           | No             | No               | No                | No               | No               | No               | -9.2          |
| 4Da7    | High          | No           | No             | No               | No                | No               | No               | No               | -8.9          |
| 4Da8    | High          | No           | No             | No               | No                | No               | No               | No               | -8.66         |
| 4Da9    | High          | No           | No             | No               | No                | No               | No               | No               | -8.86         |
| 4Da10   | High          | No           | No             | No               | No                | No               | No               | No               | -9.13         |
| 4Da11   | High          | No           | No             | No               | No                | No               | No               | No               | -8.74         |
| 4Db1    | High          | No           | No             | No               | No                | No               | No               | No               | -10.24        |
| 4Db2    | High          | No           | No             | No               | No                | No               | No               | No               | -10.32        |
| 4Db3    | High          | No           | No             | No               | No                | No               | No               | No               | -10.16        |
| 4Db4    | High          | No           | No             | No               | No                | No               | No               | No               | -10.55        |
| 4Db5    | High          | No           | No             | No               | No                | No               | No               | No               | -10.31        |
| 4Db6    | High          | No           | No             | No               | No                | No               | No               | No               | -10.15        |
| 4Dc1    | Low           | No           | No             | No               | No                | No               | No               | No               | -11.65        |
| 4Dc2    | Low           | No           | No             | No               | No                | No               | No               | No               | -11.98        |
| 4Dc3    | Low           | No           | No             | No               | No                | No               | No               | No               | -11.98        |
| 4Dc4    | High          | No           | No             | No               | No                | No               | No               | No               | -11.27        |
| 4Dc5    | High          | No           | No             | No               | No                | No               | No               | No               | -11.59        |
| 4Dc6    | Low           | No           | Yes            | No               | No                | No               | No               | No               | -14.39        |
| 4Dc7    | Low           | No           | Yes            | No               | No                | No               | No               | No               | -14.22        |
| 4Dc8    | Low           | No           | Yes            | No               | No                | No               | No               | No               | -13.52        |
| 4Dd1.1  | High          | No           | No             | No               | No                | No               | No               | No               | -10.32        |
| 4Dd1.2  | High          | No           | No             | No               | No                | No               | No               | No               | -9.69         |
| 4Dd1.3  | High          | No           | No             | No               | No                | No               | No               | No               | -9.19         |
| 4Dd1.4  | High          | No           | No             | No               | No                | No               | No               | No               | -9.85         |

[illegible]



**Table S10.** The number of broken rules, according to Lipinski, Ghose, Veber, Egan and Muegge and the bioavailability score, the drug-likeness score, the lead-likeness score and the synthetic accessibility score.

| ID code | Lipinski | Ghose | Veber | Egan | Muegge | BD Score | Drug-likeness | Overall drug-likeness score | CNS MPO | >=4 | Lead-likeness | SA  |
|---------|----------|-------|-------|------|--------|----------|---------------|-----------------------------|---------|-----|---------------|-----|
| 1Aa1    | 0        | 4     | 0     | 0    | 2      | 0.55     | -17.68        | 0.49                        | 4.95    | 1   | 1             | 2.1 |
| 1Aa2    | 0        | 4     | 0     | 0    | 2      | 0.55     | -17.52        | 0.49                        | 5.25    | 1   | 1             | 2.1 |
| 1Aa3    | 0        | 2     | 0     | 0    | 2      | 0.55     | -22.37        | 0.49                        | 4.95    | 1   | 1             | 2.3 |
| 1Aa4    | 0        | 2     | 0     | 0    | 2      | 0.55     | -20.24        | 0.49                        | 5.25    | 1   | 1             | 2.3 |
| 1Aa5    | 0        | 2     | 0     | 0    | 2      | 0.55     | -26.1         | 0.49                        | 4.49    | 1   | 1             | 2   |
| 1Aa6    | 0        | 2     | 0     | 0    | 2      | 0.55     | -22.18        | 0.49                        | 5.25    | 1   | 1             | 2   |
| 1Aa7    | 0        | 0     | 0     | 0    | 2      | 0.55     | -31.48        | 0.49                        | 4.49    | 1   | 1             | 2.2 |
| 1Aa8    | 0        | 0     | 0     | 0    | 2      | 0.55     | -24.86        | 0.49                        | 5.25    | 1   | 1             | 2.2 |
| 1Ba1    | 0        | 3     | 0     | 0    | 2      | 0.55     | -17.95        | 0.3                         | 3.8     | 0   | 1             | 1.8 |
| 1Ba2    | 0        | 3     | 0     | 0    | 1      | 0.55     | -7.17         | 0.49                        | 4.14    | 1   | 1             | 1.7 |
| 1Ba3    | 0        | 3     | 0     | 0    | 2      | 0.55     | -7.32         | 0.49                        | 4.22    | 1   | 1             | 1.8 |
| 1Ca1    | 0        | 2     | 0     | 0    | 2      | 0.55     | -33.22        | 0.24                        | 4.69    | 1   | 1             | 2.1 |
| 1Ca2    | 0        | 2     | 0     | 0    | 1      | 0.55     | -23.39        | 0.24                        | 5.5     | 1   | 1             | 2.3 |
| 1Ca3    | 0        | 2     | 0     | 0    | 2      | 0.55     | -17.54        | 0.24                        | 5.25    | 1   | 1             | 2   |
| 1Da1    | 0        | 3     | 0     | 0    | 2      | 0.55     | -30.73        | 0.3                         | 4.69    | 1   | 1             | 2.2 |
| 1Da2    | 0        | 1     | 0     | 0    | 2      | 0.55     | -31.63        | 0.29                        | 3.94    | 0   | 1             | 2.3 |
| 1Da3    | 0        | 1     | 0     | 0    | 2      | 0.55     | -31.19        | 0.29                        | 4.69    | 1   | 1             | 2.3 |
| 1Da4    | 0        | 4     | 0     | 0    | 1      | 0.55     | -36.21        | 0.3                         | 5.5     | 1   | 1             | 2   |
| 2Aa1    | 0        | 1     | 0     | 0    | 1      | 0.56     | -14.6         | 0.49                        | 4.79    | 1   | 1             | 2   |
| 2Ba1    | 0        | 2     | 0     | 0    | 2      | 0.56     | -1.7          | 0.57                        | 4.25    | 1   | 1             | 1.9 |
| 2Ba2    | 0        | 0     | 0     | 0    | 2      | 0.56     | -0.78         | 0.65                        | 4.5     | 1   | 1             | 2   |
| 2Ba3    | 0        | 0     | 0     | 0    | 1      | 0.85     | -0.78         | 0.65                        | 5.5     | 1   | 1             | 2.2 |
| 2Ba4    | 0        | 0     | 0     | 0    | 2      | 0.56     | -1.92         | 0.55                        | 4.25    | 1   | 1             | 2   |
| 2Ba5    | 0        | 0     | 0     | 0    | 0      | 0.56     | -0.59         | 0.66                        | 4.5     | 1   | 1             | 2.2 |

| ID code | Lipinski | Ghose | Veber | Egan | Muegge | BD Score | Drug-likeness | Overall drug-likeness score | CNS MPO | >=4 | Lead-likeness | SA  |
|---------|----------|-------|-------|------|--------|----------|---------------|-----------------------------|---------|-----|---------------|-----|
| 2Ba6    | 0        | 0     | 0     | 0    | 2      | 0.56     | -0.5          | 0.68                        | 4.5     | 1   | 1             | 2.1 |
| 2Ba6a   | 0        | 0     | 0     | 0    | 0      | 0.56     | 0.91          | 0.18                        | 5.5     | 1   | 1             | 2.6 |
| 2Ca1    | 0        | 4     | 0     | 0    | 1      | 0.56     | -3.26         | 0.51                        | 5.09    | 1   | 1             | 2.3 |
| 3Aa1    | 0        | 0     | 0     | 0    | 0      | 0.56     | -1.22         | 0.59                        | 4.93    | 1   | 1             | 3   |
| 3Aa2    | 0        | 0     | 0     | 0    | 0      | 0.56     | -1.06         | 0.61                        | 5.5     | 1   | 1             | 3.5 |
| 3Aa3    | 0        | 0     | 0     | 0    | 1      | 0.55     | -16.32        | 0.49                        | 4.58    | 1   | 1             | 2.9 |
| 3Aa4    | 0        | 0     | 0     | 0    | 1      | 0.55     | -15.66        | 0.48                        | 4.59    | 1   | 1             | 3.3 |
| 3Aa5    | 0        | 0     | 0     | 0    | 1      | 0.55     | -6.07         | 0.49                        | 5.14    | 1   | 1             | 2.9 |
| 3Aa6    | 0        | 0     | 0     | 0    | 1      | 0.55     | -5.03         | 0.49                        | 5.03    | 1   | 1             | 3.4 |
| 3Aa7    | 0        | 0     | 0     | 0    | 1      | 0.55     | -3.12         | 0.49                        | 6       | 1   | 1             | 2.1 |
| 3Aa8    | 0        | 0     | 0     | 0    | 1      | 0.55     | 3.86          | 0.96                        | 5.75    | 1   | 1             | 2.8 |
| 3Aa9    | 0        | 0     | 0     | 0    | 1      | 0.55     | -14.51        | 0.29                        | 6       | 1   | 1             | 3.3 |
| 3Ab10   | 0        | 0     | 0     | 0    | 0      | 0.55     | -14.67        | 0.29                        | 5.75    | 1   | 1             | 3   |
| 3Ba1    | 0        | 0     | 0     | 0    | 0      | 0.56     | -1.92         | 0.54                        | 4.49    | 1   | 1             | 2.9 |
| 3Ba2    | 0        | 0     | 0     | 0    | 2      | 0.55     | -17.27        | 0.48                        | 4.15    | 1   | 1             | 2.8 |
| 3Ba3    | 0        | 0     | 0     | 0    | 2      | 0.55     | -7.02         | 0.48                        | 4.7     | 1   | 1             | 2.8 |
| 3Ba4    | 0        | 0     | 0     | 1    | 1      | 0.55     | -15.57        | 0.48                        | 3.91    | 0   | 1             | 3.4 |
| 3Ba5    | 0        | 1     | 0     | 0    | 1      | 0.55     | 3.8           | 0.96                        | 5.75    | 1   | 1             | 3.2 |
| 3Ba6    | 0        | 0     | 0     | 0    | 1      | 0.55     | -3.85         | 0.48                        | 6       | 1   | 1             | 2.1 |
| 3Bb7    | 0        | 1     | 0     | 0    | 1      | 0.55     | -15.32        | 0.29                        | 6       | 1   | 1             | 3.2 |
| 3Bb8    | 0        | 0     | 0     | 0    | 1      | 0.55     | -15.57        | 0.29                        | 5.75    | 1   | 1             | 2.8 |
| 4Aa1    | 0        | 0     | 0     | 0    | 0      | 0.56     | 2.91          | 0.17                        | 5.42    | 1   | 1             | 2.6 |
| 4Aa2    | 0        | 0     | 0     | 0    | 0      | 0.55     | -13.53        | 0.09                        | 4.49    | 1   | 1             | 2.5 |
| 4Aa3    | 0        | 0     | 0     | 0    | 1      | 0.55     | -9.27         | 0.1                         | 4.49    | 1   | 1             | 2.3 |
| 4Ab1    | 0        | 1     | 1     | 1    | 1      | 0.11     | -1.56         | 0.1                         | 4       | 0   | 1             | 2.6 |
| 4Ab2    | 0        | 2     | 0     | 0    | 2      | 0.55     | -17.31        | 0.11                        | 3.35    | 0   | 1             | 2.2 |

| ID code | Lipinski | Ghose | Veber | Egan | Muegge | BD Score | Drug-likeness | Overall drug-likeness score | CNS MPO | >=4 | Lead-likeness | SA  |
|---------|----------|-------|-------|------|--------|----------|---------------|-----------------------------|---------|-----|---------------|-----|
| 4Ac1    | 0        | 1     | 0     | 0    | 2      | 0.56     | -1.58         | 0.22                        | 4.18    | 1   | 1             | 2.7 |
| 4Ad1    | 0        | 0     | 0     | 0    | 0      | 0.55     | 0.07          | 0.21                        | 4.74    | 1   | 1             | 3.7 |
| 4Ad2    | 0        | 0     | 0     | 0    | 0      | 0.55     | 0.17          | 0.27                        | 4.49    | 1   | 1             | 3.1 |
| 4Ad3    | 0        | 0     | 0     | 0    | 0      | 0.55     | -1.76         | 0.16                        | 4.01    | 1   | 1             | 3.4 |
| 4Ae1    | 0        | 1     | 0     | 0    | 0      | 0.55     | -11.15        | 0.28                        | 4.51    | 1   | 1             | 2.4 |
| 4Ae2    | 0        | 1     | 0     | 0    | 0      | 0.55     | -7.44         | 0.28                        | 4.51    | 1   | 1             | 3   |
| 4Ba1    | 0        | 3     | 0     | 0    | 2      | 0.55     | -19.43        | 0.39                        | 4.39    | 1   | 1             | 2.9 |
| 4Ba2    | 0        | 2     | 0     | 0    | 2      | 0.55     | -19.25        | 0.49                        | 4.39    | 1   | 1             | 3   |
| 4Ba3    | 0        | 4     | 0     | 0    | 1      | 0.55     | -0.96         | 0.63                        | 5.5     | 1   | 1             | 2.2 |
| 4Ba4    | 0        | 1     | 0     | 0    | 1      | 0.55     | -20.61        | 0.39                        | 3.63    | 0   | 2             | 2.8 |
| 4Ba5    | 0        | 1     | 0     | 0    | 1      | 0.55     | -20.39        | 0.49                        | 3.63    | 0   | 2             | 2.9 |
| 4Ba6    | 0        | 1     | 0     | 0    | 0      | 0.55     | -9.1          | 0.38                        | 6       | 1   | 1             | 2   |
| 4Ba7    | 0        | 1     | 0     | 0    | 0      | 0.55     | -3.07         | 0.51                        | 6       | 1   | 1             | 1.6 |
| 4Ca1    | 0        | 2     | 0     | 0    | 1      | 0.55     | -2.34         | 0.54                        | 3.89    | 0   | 1             | 2.4 |
| 4Ca2    | 0        | 2     | 0     | 0    | 1      | 0.55     | -4.65         | 0.5                         | 3.89    | 0   | 1             | 1.7 |
| 4Ca3    | 0        | 3     | 0     | 0    | 1      | 0.56     | -1.1          | 0.61                        | 5.25    | 1   | 1             | 2.2 |
| 4Ca4    | 0        | 3     | 0     | 0    | 1      | 0.56     | -5.74         | 0.49                        | 5.25    | 1   | 1             | 1.6 |
| 4Cb1    | 0        | 3     | 0     | 0    | 1      | 0.55     | 0.01          | 0.74                        | 3.93    | 0   | 1             | 2.6 |
| 4Cb2    | 0        | 3     | 0     | 0    | 2      | 0.55     | -2.98         | 0.52                        | 3.26    | 0   | 1             | 2.9 |
| 4Cb3    | 0        | 3     | 0     | 0    | 2      | 0.55     | 1.73          | 0.35                        | 3.33    | 0   | 1             | 2.8 |
| 4Cb4    | 0        | 3     | 0     | 0    | 2      | 0.55     | 2.74          | 0.28                        | 4.71    | 1   | 1             | 3.1 |
| 4Cb5    | 0        | 2     | 0     | 0    | 1      | 0.55     | -1.81         | 0.56                        | 3.9     | 0   | 1             | 2.6 |
| 4Cb6    | 0        | 1     | 0     | 0    | 2      | 0.55     | -4.79         | 0.5                         | 3.04    | 0   | 1             | 2.8 |
| 4Cb7    | 0        | 3     | 0     | 0    | 2      | 0.55     | -1            | 0.63                        | 4.21    | 1   | 1             | 2.9 |
| 4Da1    | 0        | 0     | 0     | 1    | 2      | 0.55     | -13.79        | 0.49                        | 3.79    | 0   | 1             | 3.3 |
| 4Da2    | 0        | 0     | 0     | 1    | 2      | 0.55     | -9.5          | 0.39                        | 3.87    | 0   | 1             | 3.7 |

| ID code | Lipinski | Ghose | Veber | Egan | Muegge | BD Score | Drug-likeness | Overall drug-likeness score | CNS MPO | >=4 | Lead-likeness | SA  |
|---------|----------|-------|-------|------|--------|----------|---------------|-----------------------------|---------|-----|---------------|-----|
| 4Da3    | 0        | 0     | 0     | 1    | 2      | 0.55     | -12.19        | 0.39                        | 3.83    | 0   | 1             | 3.8 |
| 4Da4    | 0        | 0     | 0     | 1    | 2      | 0.55     | -15.06        | 0.49                        | 3.24    | 0   | 1             | 3.6 |
| 4Da5    | 0        | 0     | 0     | 1    | 2      | 0.55     | -9.43         | 0.39                        | 3.25    | 0   | 1             | 4.1 |
| 4Da6    | 0        | 0     | 0     | 1    | 2      | 0.55     | -12.12        | 0.39                        | 3.21    | 0   | 1             | 4.3 |
| 4Da7    | 0        | 0     | 0     | 0    | 2      | 0.55     | -2.39         | 0.43                        | 4.53    | 1   | 1             | 4.1 |
| 4Da8    | 0        | 0     | 0     | 0    | 1      | 0.55     | 2.91          | 0.37                        | 5.5     | 1   | 1             | 4.1 |
| 4Da9    | 0        | 0     | 0     | 0    | 2      | 0.55     | 2.39          | 0.36                        | 4.91    | 1   | 1             | 4.2 |
| 4Da10   | 0        | 0     | 0     | 0    | 2      | 0.55     | -3.98         | 0.4                         | 3.97    | 0   | 1             | 3.9 |
| 4Da11   | 0        | 0     | 0     | 0    | 1      | 0.55     | -0.26         | 0.56                        | 5.24    | 1   | 1             | 4.1 |
| 4Db1    | 0        | 1     | 0     | 0    | 2      | 0.55     | -10.57        | 0.19                        | 5.03    | 1   | 1             | 3.6 |
| 4Db2    | 0        | 2     | 0     | 0    | 2      | 0.55     | -15.66        | 0.4                         | 3.85    | 0   | 1             | 4.2 |
| 4Db3    | 0        | 1     | 0     | 0    | 2      | 0.55     | -13.1         | 0.4                         | 4.63    | 1   | 1             | 4   |
| 4Db4    | 0        | 0     | 0     | 0    | 2      | 0.55     | -17.53        | 0.39                        | 3.86    | 0   | 1             | 4   |
| 4Db5    | 0        | 1     | 0     | 0    | 2      | 0.55     | -12.17        | 0.39                        | 4.25    | 1   | 1             | 3.8 |
| 4Db6    | 0        | 0     | 0     | 0    | 1      | 0.55     | -12.33        | 0.39                        | 4.25    | 1   | 1             | 3.8 |
| 4Dc1    | 0        | 0     | 1     | 1    | 2      | 0.11     | -19.52        | 0.49                        | 3       | 0   | 1             | 4   |
| 4Dc2    | 0        | 1     | 1     | 1    | 2      | 0.11     | -14.83        | 0.49                        | 3       | 0   | 1             | 4   |
| 4Dc3    | 0        | 1     | 1     | 1    | 2      | 0.11     | -13.59        | 0.39                        | 3       | 0   | 1             | 3.9 |
| 4Dc4    | 0        | 0     | 0     | 0    | 1      | 0.55     | -15.89        | 0.39                        | 3.68    | 0   | 1             | 4.9 |
| 4Dc5    | 0        | 0     | 0     | 0    | 1      | 0.55     | -15.48        | 0.49                        | 3.65    | 0   | 1             | 4.3 |
| 4Dc6    | 1        | 1     | 1     | 1    | 3      | 0.11     | -13.01        | 0.48                        | 3.59    | 0   | 0             | 3.9 |
| 4Dc7    | 1        | 1     | 1     | 1    | 3      | 0.11     | -11.31        | 0.48                        | 4       | 0   | 0             | 3.9 |
| 4Dc8    | 1        | 1     | 1     | 1    | 3      | 0.11     | -11.68        | 0.49                        | 3.38    | 0   | 0             | 3.9 |
| 4Dd1.1  | 0        | 3     | 0     | 0    | 2      | 0.55     | -12.63        | 0.49                        | 4.05    | 1   | 1             | 2.1 |
| 4Dd1.2  | 0        | 3     | 0     | 0    | 2      | 0.55     | -2.8          | 0.52                        | 4.44    | 1   | 1             | 2.5 |
| 4Dd1.3  | 0        | 3     | 0     | 0    | 2      | 0.55     | -4.53         | 0.5                         | 4.58    | 1   | 1             | 2.7 |

| ID code | Lipinski | Ghose | Veber | Egan | Muegge | BD Score | Drug-likeness | Overall drug-likeness score | CNS MPO | >=4 | Lead-likeness | SA  |
|---------|----------|-------|-------|------|--------|----------|---------------|-----------------------------|---------|-----|---------------|-----|
| 4Dd1.4  | 0        | 3     | 0     | 0    | 2      | 0.55     | 1.89          | 0.92                        | 4.02    | 1   | 1             | 2.4 |
| 4Dd2.1  | 0        | 2     | 0     | 0    | 2      | 0.55     | -12.96        | 0.09                        | 3.36    | 0   | 1             | 2.5 |
| 4Dd3.1  | 0        | 4     | 0     | 0    | 2      | 0.55     | -0.88         | 0.64                        | 4.43    | 1   | 1             | 2.5 |
| 4Dd4.1  | 1        | 1     | 1     | 1    | 3      | 0.55     | -11.98        | 0.48                        | 3.78    | 0   | 1             | 3.4 |
| 4Dd4.2  | 1        | 1     | 1     | 1    | 3      | 0.55     | -17.92        | 0.47                        | 3.78    | 0   | 1             | 3.6 |
| 4Dd4.3  | 1        | 1     | 2     | 1    | 3      | 0.11     | -14.91        | 0.47                        | 3.78    | 0   | 1             | 3.4 |
| 4Dd4.m  | 0        | 1     | 0     | 0    | 1      | 0.55     | -13.43        | 0.49                        | 3.48    | 0   | 1             | 2.3 |
| 5Aa1    | 0        | 1     | 1     | 1    | 0      | 0.56     | -0.44         | 0.3                         | 2.34    | 0   | 2             | 4.6 |
| 5Aa2    | 0        | 0     | 0     | 0    | 0      | 0.55     | -2.07         | 0.25                        | 5.29    | 1   | 1             | 4.1 |
| 5Aa3    | 2        | 3     | 2     | 1    | 1      | 0.17     | -18.6         | 0.19                        | 2.24    | 0   | 2             | 5.7 |
| 5Aa4    | 2        | 3     | 2     | 1    | 1      | 0.17     | -17.94        | 0.19                        | 3       | 0   | 2             | 5.7 |
| 5Ba1    | 2        | 3     | 2     | 1    | 3      | 0.17     | -14.01        | 0.15                        | 2.26    | 0   | 3             | 6.2 |
| 5Ba2    | 2        | 3     | 2     | 1    | 3      | 0.17     | -13.35        | 0.15                        | 2.81    | 0   | 3             | 6.2 |
| 5Ca1    | 0        | 0     | 0     | 0    | 0      | 0.55     | -16.76        | 0.04                        | 3.22    | 0   | 2             | 3.8 |
| 5Ca2    | 0        | 0     | 0     | 0    | 0      | 0.55     | -16.07        | 0.04                        | 3.98    | 0   | 2             | 3.8 |
| 5Da1    | 0        | 0     | 0     | 0    | 0      | 0.55     | -17.14        | 0.4                         | 2.72    | 0   | 1             | 4.8 |
| 5Da2    | 0        | 0     | 0     | 0    | 0      | 0.55     | -16.85        | 0.4                         | 2.76    | 0   | 1             | 4.8 |
| 5Da3    | 2        | 3     | 2     | 1    | 3      | 0.17     | -17.3         | 0.3                         | 2.03    | 0   | 2             | 5.6 |
| 5Ea1    | 0        | 0     | 0     | 0    | 1      | 0.55     | -16.7         | 0.4                         | 0       | 0   | 1             | 5.2 |
| 5Ea2    | 0        | 0     | 0     | 0    | 1      | 0.55     | -16.7         | 0.4                         | 0       | 0   | 1             | 5.2 |
| 5Ea3    | 2        | 3     | 2     | 1    | 3      | 0.17     | -16.85        | 0.31                        | 2.09    | 0   | 2             | 5.9 |

**Figure S1.** Homododecameric structure of the bacterial GS enzyme and D subunit, which was tested during the molecular docking study [31]. Two manganese ions and an AMP residue can be seen in the active site of subunit D. The structures were generated using UCSF Chimera software based on the PDB code of GS taken from the Protein Data Bank [31,32].

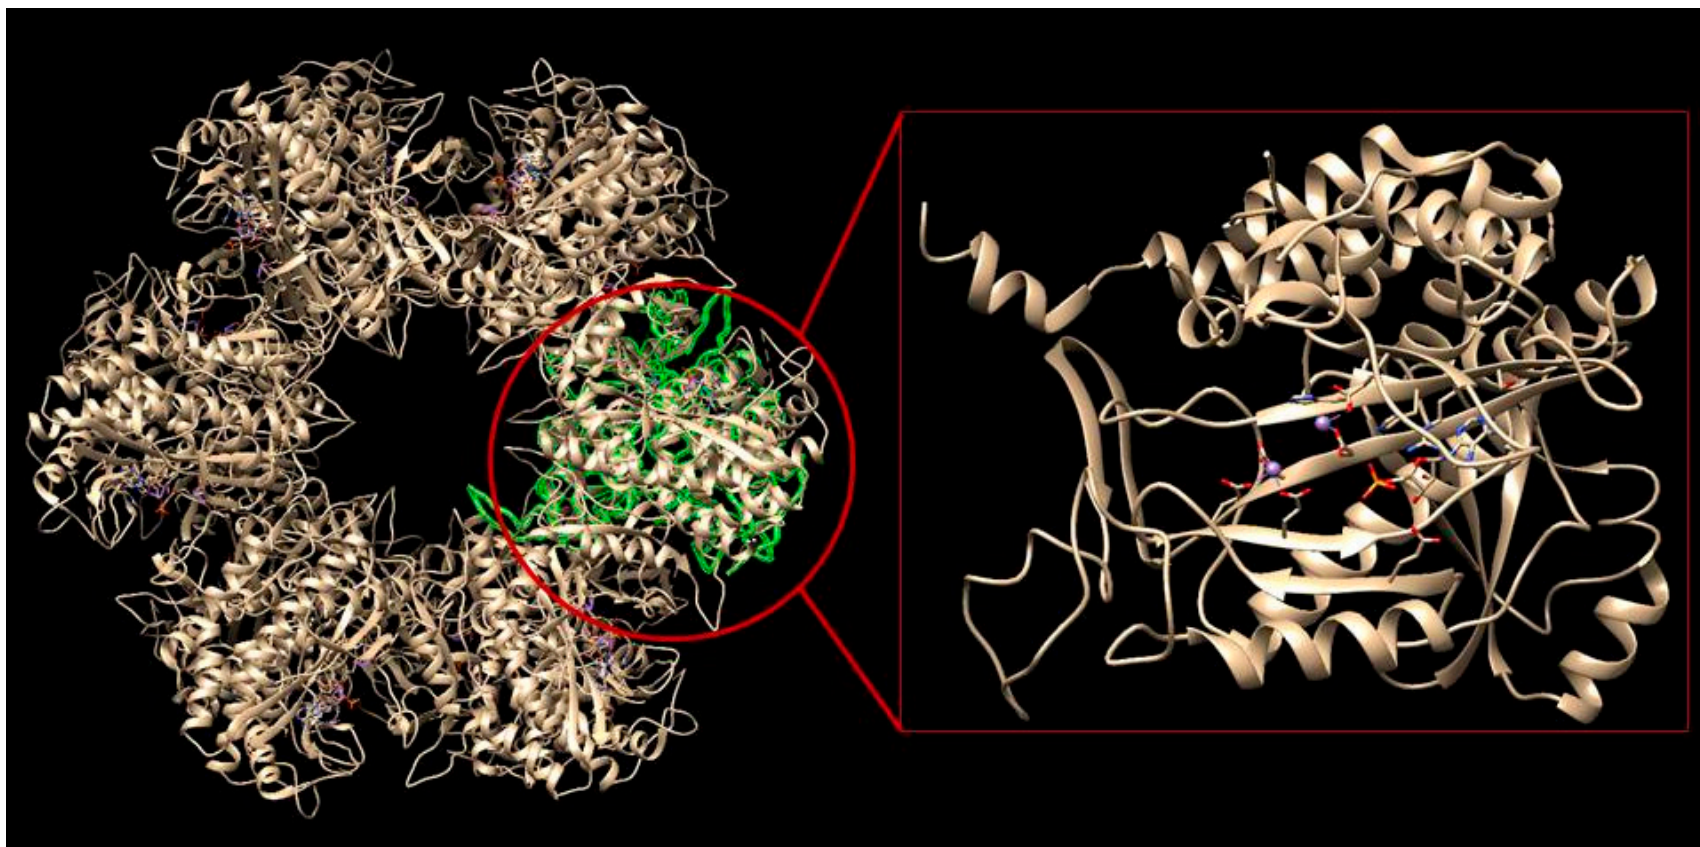

**Figure S2.** Molecular docking results visualized using UCSF Chimera and AutoDock Vina (Webina) [31,33,34]

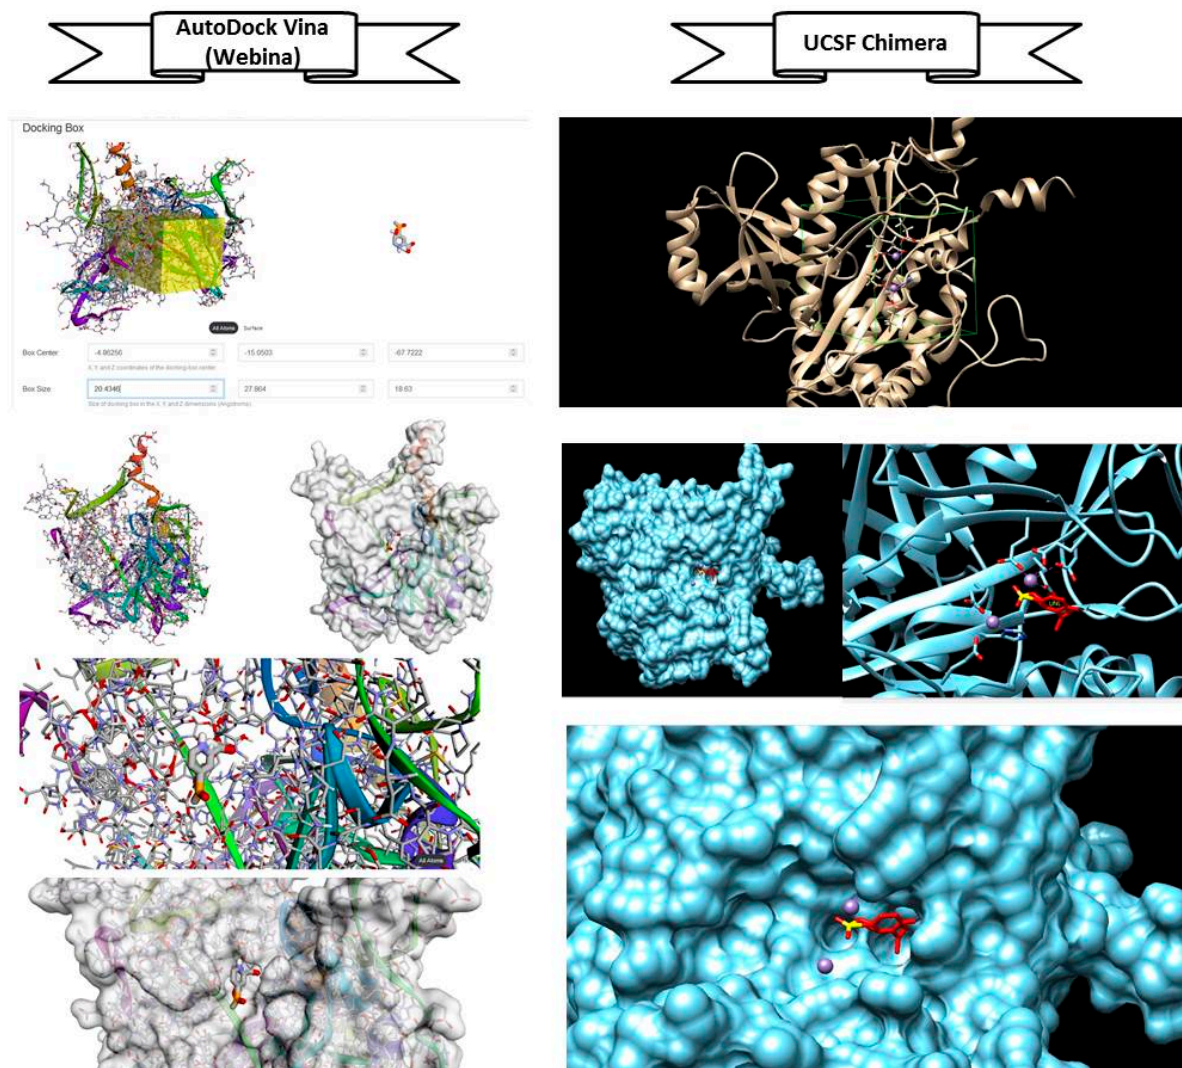

**Table S11.** Chemical structures of colchicine, neferine, 7-hydroxynuciferine, lycorine, 5,6-dehydrolycorine [35].

| Colchicine                                                                         | Neferine                                                                             | 7-hydroxynuciferine                                                                 |
|------------------------------------------------------------------------------------|--------------------------------------------------------------------------------------|-------------------------------------------------------------------------------------|
| 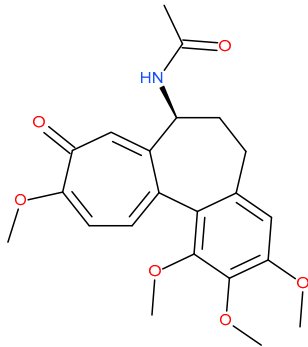  |    |  |
| Lycorine                                                                           |                                                                                      | 5,6-dehydrolycorine                                                                 |
|  |  |                                                                                     |



**Table S12.** Toxicity comparison of vegetal compounds and their complexes with glutamic acid [1,6,36].

**Table S12 (A).** Toxicity (I) Cramer rules, Kroess and Verhaar scheme.

| ID code/<br>name | Cramer       | Kroess TTC                                                                                      |                                                                  | Verhaar<br>scheme |
|------------------|--------------|-------------------------------------------------------------------------------------------------|------------------------------------------------------------------|-------------------|
|                  | Toxic Hazard | Estimate                                                                                        | Explanation                                                      |                   |
| <b>5Aa1</b>      | Class I      | Substance would not be expected to be a safety concern                                          | Verify structural alerts for potential genotoxic carcinogenicity | Class 5           |
| <b>5Aa2</b>      | Class III    | Substance would not be expected to be a safety concern                                          | Verify structural alerts for potential genotoxic carcinogenicity | Class 5           |
| <b>5Aa3</b>      | Class I      | Substance would not be expected to be a safety concern                                          | Verify structural alerts for potential genotoxic carcinogenicity | Class 5           |
| <b>5Aa4</b>      | Class I      | Substance would not be expected to be a safety concern                                          | Verify structural alerts for potential genotoxic carcinogenicity | Class 5           |
| <b>5Ba1</b>      | Class III    | Substance would not be expected to be a safety concern                                          | Verify structural alerts for potential genotoxic carcinogenicity | Class 5           |
| <b>5Ba2</b>      | Class III    | Substance would not be expected to be a safety concern                                          | Verify structural alerts for potential genotoxic carcinogenicity | Class 5           |
| <b>5Ca1</b>      | Class III    | Negligible risk (low probability of a life-time cancer risk greater than 1 in 10 <sup>6</sup> ) | Genotoxic potential. Polycyclic Aromatic Hydrocarbons            | Class 5           |
| <b>5Ca2</b>      | Class III    | Negligible risk (low probability of a life-time cancer risk greater than 1 in 10 <sup>6</sup> ) | Genotoxic potential. Polycyclic Aromatic Hydrocarbons            | Class 5           |
| <b>5Da1</b>      | Class III    | Substance would not be expected to be a safety concern                                          | Verify structural alerts for potential genotoxic carcinogenicity | Class 5           |
| <b>5Da2</b>      | Class III    | Substance would not be expected to be a safety concern                                          | Verify structural alerts for potential genotoxic carcinogenicity | Class 5           |
| <b>5Da3</b>      | Class III    | Substance would not be expected to be a safety concern                                          | Verify structural alerts for potential genotoxic carcinogenicity | Class 5           |
| <b>5Ea1</b>      | Class III    | Substance would not be expected to be a safety concern                                          | Verify structural alerts for potential genotoxic carcinogenicity | Class 5           |
| <b>5Ea2</b>      | Class III    | Substance would not be expected to be a safety concern                                          | Verify structural alerts for potential genotoxic carcinogenicity | Class 5           |

| ID code/<br>name           | Cramer       | Kroess TTC                                             |                                                                  | Verhaar<br>scheme |
|----------------------------|--------------|--------------------------------------------------------|------------------------------------------------------------------|-------------------|
|                            | Toxic Hazard | Estimate                                               | Explanation                                                      |                   |
| <b>5Ea3</b>                | Class III    | Substance would not be expected to be a safety concern | Verify structural alerts for potential genotoxic carcinogenicity | Class 5           |
| <b>Colchicine</b>          | Class I      | Substance would not be expected to be a safety concern | Verify structural alerts for potential genotoxic carcinogenicity | Class 5           |
| <b>Neferine</b>            | Class III    | Substance would not be expected to be a safety concern | Verify structural alerts for potential genotoxic carcinogenicity | Class 5           |
| <b>7-hydroxynuciferine</b> | Class III    | Substance would not be expected to be a safety concern | Verify structural alerts for potential genotoxic carcinogenicity | Class 3           |
| <b>Lycorine</b>            | Class III    | Substance would not be expected to be a safety concern | Verify structural alerts for potential genotoxic carcinogenicity | Class 3           |
| <b>5,6-dehydrolycorine</b> | Class III    | Substance would not be expected to be a safety concern | Verify structural alerts for potential genotoxic carcinogenicity | Class 3           |

**Table S12 (B).** Toxicity (II) Carcinogenic (genotoxic and non-genotoxic) and mutagenic effects evaluated using two different apps (Toxtree and OSIRIS).

| ID<br>code/name | Carcinogenicity  |              |                      | Mutagenicity                                 |          |
|-----------------|------------------|--------------|----------------------|----------------------------------------------|----------|
|                 | Genotox. Toxtree | Non-genotox. | Tumorigen.<br>OSIRIS | Toxtree (Ames test)<br><i>S. typhimurium</i> | OSIRIS   |
| <b>5Aa1</b>     | Negative         | Negative     | Negative             | Negative                                     | Negative |
| <b>5Aa2</b>     | Negative         | Negative     | Negative             | Negative                                     | Negative |
| <b>5Aa3</b>     | Negative         | Negative     | Negative             | Negative                                     | Negative |
| <b>5Aa4</b>     | Negative         | Negative     | Negative             | Negative                                     | Negative |
| <b>5Ba1</b>     | Negative         | Negative     | Negative             | Negative                                     | Negative |
| <b>5Ba2</b>     | Negative         | Negative     | Negative             | Negative                                     | Negative |

| ID code/name               | Carcinogenicity                                |                                                   |                   | Mutagenicity                                            |           |
|----------------------------|------------------------------------------------|---------------------------------------------------|-------------------|---------------------------------------------------------|-----------|
|                            | Genotox. Toxtree                               | Non-genotox.                                      | Tumorigen. OSIRIS | Toxtree (Ames test) <i>S. typhimurium</i>               | OSIRIS    |
| <b>5Ca1</b>                | Structural Alert for genotoxic carcinogenicity | Structural Alert for nongenotoxic carcinogenicity | High risk         | Structural alert for <i>S. typhimurium</i> mutagenicity | High risk |
| <b>5Ca2</b>                | Structural Alert for genotoxic carcinogenicity | Structural Alert for nongenotoxic carcinogenicity | High risk         | Structural alert for <i>S. typhimurium</i> mutagenicity | High risk |
| <b>5Da1</b>                | Negative                                       | Structural Alert for nongenotoxic carcinogenicity | Negative          | Negative                                                | Negative  |
| <b>5Da2</b>                | Negative                                       | Structural Alert for nongenotoxic carcinogenicity | Negative          | Negative                                                | Negative  |
| <b>5Da3</b>                | Negative                                       | Structural Alert for nongenotoxic carcinogenicity | Negative          | Negative                                                | Negative  |
| <b>5Ea1</b>                | Negative                                       | Structural Alert for nongenotoxic carcinogenicity | Negative          | Negative                                                | Negative  |
| <b>5Ea2</b>                | Negative                                       | Structural Alert for nongenotoxic carcinogenicity | Negative          | Negative                                                | Negative  |
| <b>5Ea3</b>                | Negative                                       | Structural Alert for nongenotoxic carcinogenicity | Negative          | Negative                                                | Negative  |
| <b>Colchicine</b>          | Negative                                       | Negative                                          | Negative          | Negative                                                | Negative  |
| <b>Neferine</b>            | Negative                                       | Negative                                          | Negative          | Negative                                                | Negative  |
| <b>7-hydroxynuciferine</b> | Negative                                       | Structural Alert for nongenotoxic carcinogenicity | Negative          | Structural alert for <i>S. typhimurium</i> mutagenicity | Negative  |
| <b>Lycorine</b>            | Negative                                       | Structural Alert for nongenotoxic carcinogenicity | Negative          | Negative                                                | Negative  |
| <b>5,6-dehydrolycorine</b> | Negative                                       | Structural Alert for nongenotoxic carcinogenicity | Unknown           | Negative                                                | Unknown   |

**Table S12 (C).** Toxicity (III) Irritant/corrosive effect on the skin and eyes, effect on the reproductive system.

| ID code/name | Irritation/corrosion |                   |          | Effect on the reproductive system |
|--------------|----------------------|-------------------|----------|-----------------------------------|
|              | Skin                 | Eye               | OSIRIS   | OSIRIS                            |
| <b>5Aa1</b>  | Not corrosive        | No skin corrosion | Negative | High risk                         |
| <b>5Aa2</b>  | Not corrosive        | No skin corrosion | Negative | High risk                         |

| ID code/name               | Irritation/corrosion           |                   |           | Effect on the reproductive system |
|----------------------------|--------------------------------|-------------------|-----------|-----------------------------------|
|                            | Skin                           | Eye               | OSIRIS    | OSIRIS                            |
| <b>5Aa3</b>                | Not corrosive                  | No skin corrosion | Negative  | High risk                         |
| <b>5Aa4</b>                | Not corrosive                  | No skin corrosion | Negative  | High risk                         |
| <b>5Ba1</b>                | Not corrosive                  | No eye irritation | Negative  | Negative                          |
| <b>5Ba2</b>                | Not corrosive                  | No eye irritation | Negative  | Negative                          |
| <b>5Ca1</b>                | Not corrosive                  | No skin corrosion | High risk | High risk                         |
| <b>5Ca2</b>                | Not corrosive                  | No skin corrosion | High risk | High risk                         |
| <b>5Da1</b>                | Not corrosive                  | No skin corrosion | Negative  | Negative                          |
| <b>5Da2</b>                | Not corrosive                  | No skin corrosion | Negative  | Negative                          |
| <b>5Da3</b>                | Not corrosive                  | No skin corrosion | Negative  | Negative                          |
| <b>5Ea1</b>                | Not corrosive                  | No skin corrosion | Negative  | Negative                          |
| <b>5Ea2</b>                | Not corrosive                  | No skin corrosion | Negative  | Negative                          |
| <b>5Ea3</b>                | Not irritating<br>or corrosive | No skin corrosion | Negative  | Negative                          |
| <b>Colchicine</b>          | Not corrosive                  | No skin corrosion | Negative  | High risk                         |
| <b>Neferine</b>            | Not corrosive                  | No skin corrosion | Negative  | Negative                          |
| <b>7-hydroxynuciferine</b> | Not corrosive                  | No skin corrosion | Negative  | Negative                          |
| <b>Lycorine</b>            | Irritating                     | Unknown           | Negative  | Negative                          |
| <b>5,6-dehydrolycorine</b> | Irritating                     | Unknown           | Unknown   | Unknown                           |

**Table S13.** Characterization of phosphinothricin, methionine sulfoximine, glutamic acid and ampicillin.

Table S13 (A). Chemical structures and computational descriptors of phosphinothricin, methionine sulfoximine, glutamic acid and ampicillin, obtained with BioviaDraw.

| Compound               | Structural formula                                                                 | SMILES                                                     | Molecular weight | Molecular formula                                               | IUPAC name                                                                                               | InChI String                                                                                                                             | InChI Key                       |
|------------------------|------------------------------------------------------------------------------------|------------------------------------------------------------|------------------|-----------------------------------------------------------------|----------------------------------------------------------------------------------------------------------|------------------------------------------------------------------------------------------------------------------------------------------|---------------------------------|
| Phosphinothricin       | 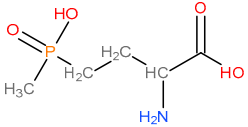  | <chem>CP(=O)(O)CCC(N)C(=O)O</chem>                         | 181.13           | C <sub>5</sub> H <sub>12</sub> NO <sub>4</sub> P                | 2-amino-4-[hydroxy(methyl)phosphoryl]butanoic acid                                                       | InChI=1S/C5H12NO4P/c1-11(9,10)3-2-4(6)5(7)8/h4H,2-3,6H2,1H3,(H,7,8)(H,9,10)                                                              | IAJOBQBIJHVG<br>MQ-UHFFFAOYSA-N |
| Methionine sulfoximine |   | <chem>CS(=N)(=O)CCC(N)C(=O)O</chem>                        | 180.23           | C <sub>5</sub> H <sub>12</sub> N <sub>2</sub> O <sub>3</sub> S  | 2-amino-4-(methylsulfonimidoyl)butanoic acid                                                             | InChI=1S/C5H12N2O3S/c1-11(7,10)3-2-4(6)5(8)9/h4,7H,2-3,6H2,1H3,(H,8,9)                                                                   | SXTAYKAGBX<br>MACB-UHFFFAOYSA-N |
| Glutamic acid          |   | <chem>NC(CCC(=O)O)C(=O)O</chem>                            | 147.13           | C <sub>5</sub> H <sub>9</sub> NO <sub>4</sub>                   | 2-aminopentanedioic acid                                                                                 | InChI=1S/C5H9NO4/c6-3(5(9)10)1-2-4(7)8/h3H,1-2,6H2,(H,7,8)(H,9,10)                                                                       | WHUUTDBJXJ<br>RKMK-UHFFFAOYSA-N |
| Ampicillin             |  | <chem>CC1(C)SC2C(NC(=O)C(N)c3ccccc3)C(=O)N2C1C(=O)O</chem> | 349.40           | C <sub>16</sub> H <sub>19</sub> N <sub>3</sub> O <sub>4</sub> S | 6-[(2-amino-2-phenylacetyl)amino]-3,3-dimethyl-7-oxo-4-thia-1-azabicyclo[3.2.0]heptane-2-carboxylic acid | InChI=1S/C16H19N3O4S/c1-16(2)11(15(22)23)19-13(21)10(14(19)24-16)18-12(20)9(17)8-6-4-3-5-7-8/h3-7,9-11,14H,17H2,1-2H3,(H,18,20)(H,22,23) | AVKUERGKIZ<br>MTKX-UHFFFAOYSA-N |

Table S13 (B). Structural and physicochemical properties. Protonation and electric charge.

| Compound               | Structural and physicochemical properties |     |               |    |                  |               |       |        | Protonation |           |           |      |              | Electric charge      |
|------------------------|-------------------------------------------|-----|---------------|----|------------------|---------------|-------|--------|-------------|-----------|-----------|------|--------------|----------------------|
|                        | HA                                        | HAA | Fraction Csp3 | RB | H-bond acceptors | H-bond donors | MR    | TPSA   | Acidic pKa  | Basic pKa | pKa score | pI   | Microspecies | Molar polarizability |
| Phosphinothricin       | 11                                        | 0   | 0.8           | 4  | 5                | 3             | 40.45 | 110.43 | 3.19        | 9.53      | 9.53      | 3.57 | 5            | 15.91                |
| Methionine sulfoximine | 11                                        | 0   | 0.8           | 4  | 5                | 3             | 42.30 | 112.62 | 2.22        | 9.09      | 9.09      | 6.10 | 5            | 16.92                |
| Glutamic acid          | 10                                        | 0   | 0.6           | 4  | 5                | 3             | 32.40 | 100.62 | 2.58        | 9.54      | 9.54      | 3.52 | 5            | 12.69                |
| Ampicillin             | 24                                        | 6   | 0.44          | 5  | 5                | 3             | 92.56 | 138.03 | 2.04        | 7.23      | 7.23      | 5.13 | 9            | 34.87                |

Table S13 (C). Water solubility.

| Compound               | logS AquaSol | ESOL Log S | ESOL Solub. (mg/ml) | ESOL Solub. (mol/l) | ESOL Class | Ali Log S | Ali Sol (mg/ml) | Ali Sol (mol/l) | Ali Class | Silicos-IT LogSw | Silicos-IT Sol. (mg/ml) | Silicos-IT Sol. (mol/l) | Silicos-IT class |
|------------------------|--------------|------------|---------------------|---------------------|------------|-----------|-----------------|-----------------|-----------|------------------|-------------------------|-------------------------|------------------|
| Phosphinothricin       | -0.28        | 2.48       | 54200               | 299                 | H          | 3.36      | 415000          | 2290            | H         | 0.42             | 473                     | 2.61                    | S                |
| Methionine sulfoximine | -0.51        | 0.45       | 504                 | 2.80                | H          | -0.04     | 165             | 0.916           | V         | -0.21            | 111                     | 0.618                   | S                |
| Glutamic acid          | -0.27        | 1.84       | 10100               | 68.6                | H          | 2.16      | 21500           | 146             | H         | 0.89             | 1150                    | 7.83                    | S                |
| Ampicillin             | -2.68        | -1.15      | 24.8                | 0.0709              | V          | -1.28     | 18.5            | 0.0528          | V         | -2.21            | 2.15                    | 0.00615                 | S                |

Table S13 (D). Lipophilicity - partition coefficients.

| Compound               | iLOGP | XLOGP | WLOGP | MLOGP | Silicos-IT Log P | Consensus Log P | logP  | logD at pH 7.4 | HLB   |
|------------------------|-------|-------|-------|-------|------------------|-----------------|-------|----------------|-------|
| Phosphinothricin       | -0.09 | -5.04 | -0.31 | -3.18 | -1.42            | -2.01           | -2.06 | -6.44          | 18.60 |
| Methionine sulfoximine | 0.37  | -1.81 | 0.33  | -3.27 | -0.74            | -1.03           | -2.18 | -4.45          | 18.60 |
| Glutamic acid          | 0.41  | -3.69 | -0.74 | -3.18 | -1.19            | -1.68           | -3.35 | -5.59          | 17.98 |
| Ampicillin             | 1.14  | -1.13 | -0.39 | 0.75  | 0.01             | 0.08            | 0.15  | -2.68          | 25.70 |

Table S13 (E). Toxicity (I): Cramer rules, Kroess and Verhaar scheme.

| Compound               | Cramer rules   | Kroess TTC                                               |                                                                                                                                   | Verhaar scheme                                              |
|------------------------|----------------|----------------------------------------------------------|-----------------------------------------------------------------------------------------------------------------------------------|-------------------------------------------------------------|
|                        | Toxic hazard   | Estimate                                                 | Explanation                                                                                                                       |                                                             |
| Phosphinothricin       | High-Class III | Risk assessment requires compound-specific toxicity data | Non-essential metal or metal-containing compound, or is it a polyhalogenated dibenzodioxin, -dibenzofuran, or - biphenyl compound | Class 5 (Not possible to classify according to these rules) |
| Methionine sulfoximine | High-Class III | Substance would not be expected to be a safety concern   | Verify structural alerts for potential genotoxic carcinogenicity                                                                  | Class 5 (Not possible to classify according to these rules) |
| Glutamic acid          | Low (Class I)  | Substance would not be expected to be a safety concern   | Verify structural alerts for potential genotoxic carcinogenicity                                                                  | Class 5 (Not possible to classify according to these rules) |
| Ampicillin             | High-Class III | Substance would not be expected to be a safety concern   | Verify structural alerts for potential genotoxic carcinogenicity                                                                  | Class 5 (Not possible to classify according to these rules) |

Table S13 (F). Toxicity (II). Carcinogenic (genotoxic and non-genotoxic) and mutagenic effects evaluated using two different apps (Toxtree and OSIRIS).

| Compound               | Carcinogenicity   |               |                      | Mutagenicity                              |          |
|------------------------|-------------------|---------------|----------------------|-------------------------------------------|----------|
|                        | Genotoxic Toxtree | Non-genotoxic | Tumorigenesis OSIRIS | Toxtree (Ames test) <i>S. typhimurium</i> | OSIRIS   |
| Phosphinothricin       | Negative          | Negative      | Negative             | Negative                                  | Negative |
| Methionine sulfoximine | Negative          | Negative      | Negative             | Negative                                  | Negative |
| Glutamic acid          | Negative          | Negative      | Negative             | Negative                                  | Negative |





Table S13 (I). The number of broken rules, according to Lipinski, Ghose, Veber, Egan and Muegge and the bioavailability score, the drug-likeness score, the lead-likeness score and the synthetic accessibility score.

| Compound               | Lipinski | Ghose | Veber | Egan | Muegge | BD Score | Drug-likeness | Overall drug-likeness score | CNS MPO | >=4 | Lead-likeness | SA   |
|------------------------|----------|-------|-------|------|--------|----------|---------------|-----------------------------|---------|-----|---------------|------|
| Phosphinothricin       | 0        | 0     | 0     | 0    | 2      | 0.55     | -24.95        | 0.4                         | 3.88    | 0   | 1             | 4.09 |
| Methionine sulfoximine | 0        | 0     | 0     | 0    | 1      | 0.55     | -14.3         | 0.39                        | 3.98    | 0   | 1             | 3.71 |
| Glutamic acid          | 0        | 4     | 0     | 0    | 2      | 0.56     | -18.65        | 0.49                        | 3.88    | 0   | 1             | 1.81 |
| Ampicillin             | 0        | 0     | 0     | 1    | 0      | 0.55     | 10.72         | 0.91                        | 4.24    | 1   | 0             | 4.16 |

Table S13 (J). The geometrical and isomer-conformation properties of the compounds.

| Compound               | Geometric isomers |                | Isomers   |               | Conformations   |
|------------------------|-------------------|----------------|-----------|---------------|-----------------|
|                        | Asymmetric atoms  | Chiral centres | Tautomers | Stereoisomers | Emin (kcal/mol) |
| Glutamic acid          | 1                 | 1              | 16        | 2             | 7.74            |
| Phosphinothricin       | 1                 | 1              | 21        | 2             | 54.07           |
| Methionine sulfoximine | 2                 | 2              | 56        | 4             | 43.03           |
| Ampicillin             | 4                 | 4              | 36        | 16            | 107.24          |

Table S13 (K). Compound metabolism assessed using Toxtree.

| Compound               | Primary sites of metabolism | Secondary sites of metabolism | Tertiary sites of metabolism | Quaternary sites of metabolism |
|------------------------|-----------------------------|-------------------------------|------------------------------|--------------------------------|
| Phosphinothricin       | N-dealkylation              | Amine hydroxylation           | Aliphatic hydroxylation      | Aliphatic hydroxylation        |
| Methionine sulfoximine | N-dealkylation              | Amine hydroxylation           | Aliphatic hydroxylation      | Aliphatic hydroxylation        |
| Glutamic acid          | N-dealkylation              | Amine hydroxylation           | Aliphatic hydroxylation      | Aliphatic hydroxylation        |
| Ampicillin             | N-dealkylation              | S-oxidation                   | Amine hydroxylation          | Aliphatic hydroxylation        |

Table S13 (L). Compound metabolism assessed using SmartCyp and SOMP.

| Compound               | 3A4                    |       | 2D6                    |       | 2C9                    |       |
|------------------------|------------------------|-------|------------------------|-------|------------------------|-------|
|                        | The most reactive atom | Score | The most reactive atom | Score | The most reactive atom | Score |
| Phosphinothricin       | C7                     | 35.4  | C7                     | 101.0 | N8                     | 75.8  |
| Methionine sulfoximine | C7                     | 35.4  | N3                     | 72.3  | N3                     | 64    |
| Glutamic acid          | C2                     | 35.4  | C2                     | 101.0 | N1                     | 75.8  |
| Ampicillin             | C13                    | 35.4  | S6                     | 76.6  | C13                    | 64.4  |

Table S13 (M). Bioactivity assessed using Molinspiration.

| Compound               | GPCR Ligand | Ion channel modulator | Kinase inhibitor | Nuclear receptor ligand | Protease inhibitor | Enzyme inhibitor |
|------------------------|-------------|-----------------------|------------------|-------------------------|--------------------|------------------|
| Phosphinothricin       | 0.57        | 1.51                  | -0.43            | -1.35                   | 1.34               | 1.52             |
| Methionine sulfoximine | -0.47       | 0.1                   | -1.3             | -0.91                   | -0.15              | 0.71             |
| Glutamic acid          | -0.29       | 0.25                  | -1.07            | -0.96                   | -0.16              | 0.23             |
| Ampicillin             | 0.04        | -0.47                 | -0.71            | -0.61                   | 0.87               | 0.25             |

Table S13 (N). Bioactivity assessed using the SWISSTarget predictor (most probable molecular targets and their identification data).

| Compound               | Target                                 | Common name | Uniprot ID | Target Class                        | Probability |
|------------------------|----------------------------------------|-------------|------------|-------------------------------------|-------------|
| Phosphinothricin       | Metabotropic glutamate receptor 4      | GRM4        | Q14833     | Family C G protein-coupled receptor | 0.130293    |
| Methionine sulfoximine | Tyrosine 3-hydroxylase                 | TH          | P07101     | Oxidoreductase                      | 0.063025    |
| Methionine sulfoximine | Kynureninase                           | KYNU        | Q16719     | Enzyme                              | 0.063025    |
| Methionine sulfoximine | Tyrosine-protein kinase FYN            | FYN         | P06241     | Kinase                              | 0.063025    |
| Methionine sulfoximine | Epidermal growth factor receptor erbB1 | EGFR        | P00533     | Kinase                              | 0.063025    |

| Compound                      | Target                      | Common name | Uniprot ID       | Target Class      | Probability |
|-------------------------------|-----------------------------|-------------|------------------|-------------------|-------------|
| <b>Methionine sulfoximine</b> | Tyrosine-protein kinase LCK | LCK         | P06239           | Kinase            | 0.063025    |
| <b>Glutamic acid</b>          | -                           | -           | -                | -                 | -           |
| <b>Ampicillin</b>             | Integrin alpha-4/beta-1     | ITGB1 ITGA4 | P05556<br>P13612 | Membrane receptor | 0.112748    |

Table S13 (O). Anticarcinogenic effect: most probable cell lines for which compounds exhibit cytotoxicity (Pa>0.5).

| Compound                      | Pa    | Pi    | Cell line  | Cell-line full name                               | Tissue                             | Tumour type    |
|-------------------------------|-------|-------|------------|---------------------------------------------------|------------------------------------|----------------|
| <b>Phosphinothricin</b>       | 0.722 | 0.008 | HCT-116    | Colon carcinoma                                   | Colon                              | Carcinoma      |
| <b>Phosphinothricin</b>       | 0.512 | 0.005 | MDA-MB-453 | Breast adenocarcinoma                             | Breast                             | Adenocarcinoma |
| <b>Methionine sulfoximine</b> | 0.721 | 0.003 | NCI-H1299  | Non-small cell lung carcinoma                     | Lung                               | Carcinoma      |
| <b>Methionine sulfoximine</b> | 0.514 | 0.005 | MDA-MB-453 | Breast adenocarcinoma                             | Breast                             | Adenocarcinoma |
| <b>Methionine sulfoximine</b> | 0.507 | 0.004 | BXPC-3     | Pancreatic adenocarcinoma                         | Pancreas                           | Adenocarcinoma |
| <b>Methionine sulfoximine</b> | 0.510 | 0.037 | Kasumi 1   | Childhood acute myeloid leukaemia with maturation | Haematopoietic and lymphoid tissue | Leukaemia      |
| <b>Glutamic acid</b>          | 0.773 | 0.003 | NCI-H1299  | Non-small cell lung carcinoma                     | Lung                               | Carcinoma      |
| <b>Glutamic acid</b>          | 0.554 | 0.004 | BXPC-3     | Pancreatic adenocarcinoma                         | Pancreas                           | Adenocarcinoma |
| <b>Glutamic acid</b>          | 0.525 | 0.016 | IGROV-1    | Ovarian adenocarcinoma                            | Ovary                              | Adenocarcinoma |
| <b>Glutamic acid</b>          | 0.511 | 0.034 | DMS-114    | Lung carcinoma                                    | Lung                               | Carcinoma      |
| <b>Ampicillin</b>             | -     | -     | -          | -                                                 | -                                  | -              |

Table S13 (P). Mechanisms of action and adverse/toxic effects (Pa>Pi).

| Compound                | Mechanism of action |       |                                                  | Toxic effects |       |                       |
|-------------------------|---------------------|-------|--------------------------------------------------|---------------|-------|-----------------------|
|                         | Pa                  | Pi    | Activity                                         | Pa            | Pi    | Activity              |
| <b>Phosphinothricin</b> | 0.928               | 0.004 | Glutamate-5-semialdehyde dehydrogenase inhibitor | 0.924         | 0.004 | Pure red cell aplasia |
|                         | 0.883               | 0.000 | Glutamate (mGluR6) agonist                       | 0.725         | 0.033 | Ocular toxicity       |
|                         | 0.876               | 0.000 | Glutamate (mGluR group III)                      | 0.692         | 0.030 | Respiratory failure   |

| Compound               | Mechanism of action |       |                                                       | Toxic effects |       |                       |
|------------------------|---------------------|-------|-------------------------------------------------------|---------------|-------|-----------------------|
|                        | Pa                  | Pi    | Activity                                              | Pa            | Pi    | Activity              |
|                        |                     |       | agonist                                               |               |       |                       |
|                        | 0.859               | 0.000 | Glutamate (mGluR4) agonist                            | 0.666         | 0.023 | Bronchoconstrictor    |
|                        | 0.833               | 0.014 | Methylenetetrahydrofolate reductase (NADPH) inhibitor | 0.661         | 0.036 | Nephrotoxic           |
| Methionine sulfoximine | 0.927               | 0.004 | Angiogenesis inhibitor                                | 0.725         | 0.020 | Teratogen             |
|                        | 0.921               | 0.004 | Antiinflammatory                                      | 0.700         | 0.022 | Embryotoxic           |
|                        | 0.892               | 0.002 | Phenylalanine(histidine) transaminase inhibitor       | 0.624         | 0.014 | Anemia, sideroblastic |
|                        | 0.886               | 0.005 | Acylcarnitine hydrolase inhibitor                     | 0.608         | 0.011 | Bullous pemphigoid    |
|                        | 0.877               | 0.001 | CDK1/cyclin B inhibitor                               | 0.636         | 0.053 | Pure red cell aplasia |
| Glutamic acid          | 0.971               | 0.001 | Acylcarnitine hydrolase inhibitor                     | 0.973         | 0.006 | Toxic, respiration    |
|                        | 0.963               | 0.002 | Methylenetetrahydrofolate reductase (NADPH) inhibitor | 0.958         | 0.004 | Euphoria              |
|                        | 0.960               | 0.001 | Glutamine-phenylpyruvate transaminase inhibitor       | 0.938         | 0.004 | Pure red cell aplasia |
|                        | 0.957               | 0.001 | Dimethylargininase inhibitor                          | 0.904         | 0.004 | Ulcer, aphthous       |
|                        | 0.956               | 0.002 | Protein-disulfide reductase (glutathione) inhibitor   | 0.897         | 0.002 | Anemia, sideroblastic |
| Ampicillin             | 0.984               | 0.001 | Muramoyltetrapeptide carboxypeptidase inhibitor       | 0.983         | 0.002 | Hyperthermic          |
|                        | 0.892               | 0.002 | Acylaminoacyl-peptidase inhibitor                     | 0.980         | 0.001 | Hematuria             |
|                        | 0.876               | 0.002 | Penicillin amidase inhibitor                          | 0.978         | 0.003 | Diarrhea              |
|                        | 0.852               | 0.001 | Beta lactamase inhibitor                              | 0.977         | 0.003 | Hepatitis             |
|                        | 0.824               | 0.001 | Deacetoxycephalosporin-C synthase inhibito            | 0.974         | 0.003 | Leukopenia            |

Table S13 (Q). Acute toxicity in rodents when administered intraperitoneally, intravenously, orally and subcutaneously: LD50 in mg/kg.

| Compound                      | Rat IP LD50 (mg/kg) | Rat IV LD50 (mg/kg) | Rat Oral LD50 (mg/kg) | Rat SC LD50 (mg/kg) |
|-------------------------------|---------------------|---------------------|-----------------------|---------------------|
| <b>Phosphinothricin</b>       | 99.610 in AD        | 164.200 in AD       | 2390.000 in AD        | 158.300 in AD       |
| <b>Methionine sulfoximine</b> | 169.000 in AD       | 461.000 in AD       | 2121.000 in AD        | 275.300 in AD       |
| <b>Glutamic acid</b>          | 2591.000 in AD      | 2306.000 in AD      | 8750.000 in AD        | 1789.000 in AD      |
| <b>Ampicillin</b>             | 3882.000 in AD      | 3274.000 in AD      | 7122.000 in AD        | 4185.000 in AD      |

Table S13 (R). Acute toxicity in rodents. Classification of Chemicals by OECD Project.

| Compound                      | Rat IP LD50 Classification | Rat IV LD50 Classification | Rat Oral LD50 Classification | Rat SC LD50 Classification |
|-------------------------------|----------------------------|----------------------------|------------------------------|----------------------------|
| <b>Phosphinothricin</b>       | Class 4 in AD              | Class 4 in AD              | Class 5 in AD                | Class 4 in AD              |
| <b>Methionine sulfoximine</b> | Class 4 in AD              | Class 5 in AD              | Class 5 in AD                | Class 4 in AD              |
| <b>Glutamic acid</b>          | Non-Toxic in AD            | Non-Toxic in AD            | Non-Toxic in AD              | Class 5 in AD              |
| <b>Ampicillin</b>             | Non-Toxic in AD            | Non-Toxic in AD            | Non-Toxic in AD              | Non-Toxic in AD            |

**Table S14.** Molecular dynamics simulation results for phosphinothricin, methionine sulfoximine, glutamic acid and ampicillin.

**Table S14 (A).** Molecular dynamics simulation results for phosphinothricin.

| Step | Time | Potential energy (J) | Kinetic energy (J) |
|------|------|----------------------|--------------------|
| 0    | 0.0  | 70984050134.665192   | 17649630034.095348 |
| 100  | 0.1  | 59617762094.141769   | 29018144699.701870 |
| 200  | 0.2  | 33624709116.687840   | 54736887714.538490 |
| 300  | 0.3  | 37645445501.530022   | 50757945118.525673 |
| 400  | 0.4  | 39797975676.871201   | 48497400955.978470 |
| 500  | 0.5  | 22356241679.548798   | 65788436802.400925 |
| 600  | 0.6  | 26819690545.799023   | 61534101740.961647 |
| 700  | 0.7  | 27707783530.155140   | 60349372013.520531 |
| 800  | 0.8  | 26228140325.677742   | 62112767850.083595 |
| 900  | 0.9  | 34586331635.642586   | 53759494273.691803 |
| 1000 | 1    | 60848576900.851852   | 27579401287.603355 |

**Table S14 (B).** Molecular dynamics simulation results for methionine sulfoximine.

| Step | Time | Potential energy (J) | Kinetic energy (J) |
|------|------|----------------------|--------------------|
| 0    | 0,0  | -7.246277            | 112.850105         |
| 100  | 0,1  | 12.799410            | 92.907652          |
| 200  | 0,2  | 41.244191            | 64.689609          |
| 300  | 0,3  | 4.077037             | 101.295037         |
| 400  | 0,4  | 10.099424            | 95.784242          |
| 500  | 0,5  | 11.476127            | 94.100435          |
| 600  | 0,6  | 43.183180            | 62.758407          |
| 700  | 0,7  | 8.595850             | 96.926621          |
| 800  | 0,8  | 16.903825            | 89.079292          |
| 900  | 0,9  | 17.561657            | 88.057453          |
| 1000 | 1    | 12.904022            | 93.316199          |

**Table S14 (C).** Molecular dynamics simulation results for glutamic acid.

| Step | Time | Potential energy (J) | Kinetic energy (J) |
|------|------|----------------------|--------------------|
| 0    | 0,0  | 29.898415            | 71.027669          |
| 100  | 0,1  | 48.948327            | 52.053117          |
| 200  | 0,2  | 24.728076            | 75.854390          |
| 300  | 0,3  | 29.036512            | 71.779454          |
| 400  | 0,4  | 27.661968            | 73.274734          |
| 500  | 0,5  | 29.280999            | 71.495538          |
| 600  | 0,6  | 37.225955            | 64.040151          |
| 700  | 0,7  | 40.725388            | 59.927943          |
| 800  | 0,8  | 40.613214            | 60.750139          |
| 900  | 0,9  | 38.849046            | 62.104697          |
| 1000 | 1    | 26.331205            | 74.756608          |

**Table S14 (D).** Molecular dynamics simulation results for ampicillin.

| Step | Time | Potential energy (J) | Kinetic energy (J) |
|------|------|----------------------|--------------------|
| 0    | 0,0  | 273.742527           | 149.966886         |
| 100  | 0,1  | 267.842493           | 155.898570         |
| 200  | 0,2  | 251.843917           | 171.523523         |
| 300  | 0,3  | 286.427591           | 136.824938         |
| 400  | 0,4  | 258.661823           | 164.364377         |
| 500  | 0,5  | 274.136545           | 149.045394         |
| 600  | 0,6  | 265.744426           | 157.635224         |
| 700  | 0,7  | 271.681095           | 151.851149         |
| 800  | 0,8  | 284.590500           | 139.364032         |
| 900  | 0,9  | 273.402343           | 150.206466         |
| 1000 | 1    | 295.206664           | 128.533068         |

**Table S15.** Molecular docking results for phosphinothricin, methionine sulfoximine, glutamic acid and ampicillin [37].

**Table S15 (A).** Molecular docking results for phosphinothricin.

| Nr | Score | Interface area |
|----|-------|----------------|
| 1  | 6200  | 1123.03        |
| 2  | 3000  | 640.87         |
| 3  | 1700  | 444.33         |
| 4  | 800   | 329.91         |
| 5  | 700   | 386.49         |
| 6  | 600   | 454.29         |
| 7  | 400   | 367.2          |
| 8  | 0     | 372.75         |
| 9  | 0     | 157.72         |
| 10 | 0     | 3.18           |

**Table S15 (B).** Molecular docking results for methionine sulfoximine.

| Nr | Score | Interface area |
|----|-------|----------------|
| 1  | 8000  | 1123.03        |
| 2  | 7900  | 372.75         |
| 3  | 6900  | 157.72         |
| 4  | 6300  | 640.87         |
| 5  | 6300  | 454.29         |
| 6  | 5200  | 318.53         |
| 7  | 4900  | 329.91         |
| 8  | 4600  | 386.49         |
| 9  | 3800  | 444.33         |
| 10 | 3500  | 367.2          |

**Table S15 (C).** Molecular docking results for glutamic acid.

| Nr | Score | Interface area |
|----|-------|----------------|
| 1  | 8000  | 1123.03        |
| 2  | 6300  | 640.87         |
| 3  | 3800  | 444.33         |



| Nr | Score | Interface area |
|----|-------|----------------|
| 4  | 4900  | 329.91         |
| 5  | 4600  | 386.49         |
| 6  | 6300  | 454.29         |
| 7  | 3500  | 367.2          |
| 8  | 2900  | 226.54         |
| 9  | 1700  | 287.79         |
| 10 | 1600  | 211.55         |

**Table S15 (D).** Molecular docking results for ampicillin.

| Nr | Score | Interface area |
|----|-------|----------------|
| 1  | 0.8   | 1123.03        |
| 2  | 0.79  | 372.75         |
| 3  | 0.69  | 157.72         |
| 4  | 0.63  | 640.87         |
| 5  | 0.63  | 454.29         |
| 6  | 0.52  | 318.53         |
| 7  | 0.49  | 329.91         |
| 8  | 0.46  | 386.49         |
| 9  | 0.38  | 444.33         |
| 10 | 0.35  | 367.2          |

**Figure S3.** Molecular docking results. Interaction with glutamine synthetase of (a) phosphinotricin, (b) methionine sulfoximine, (c) glutamic acid and (d) ampicillin [37].

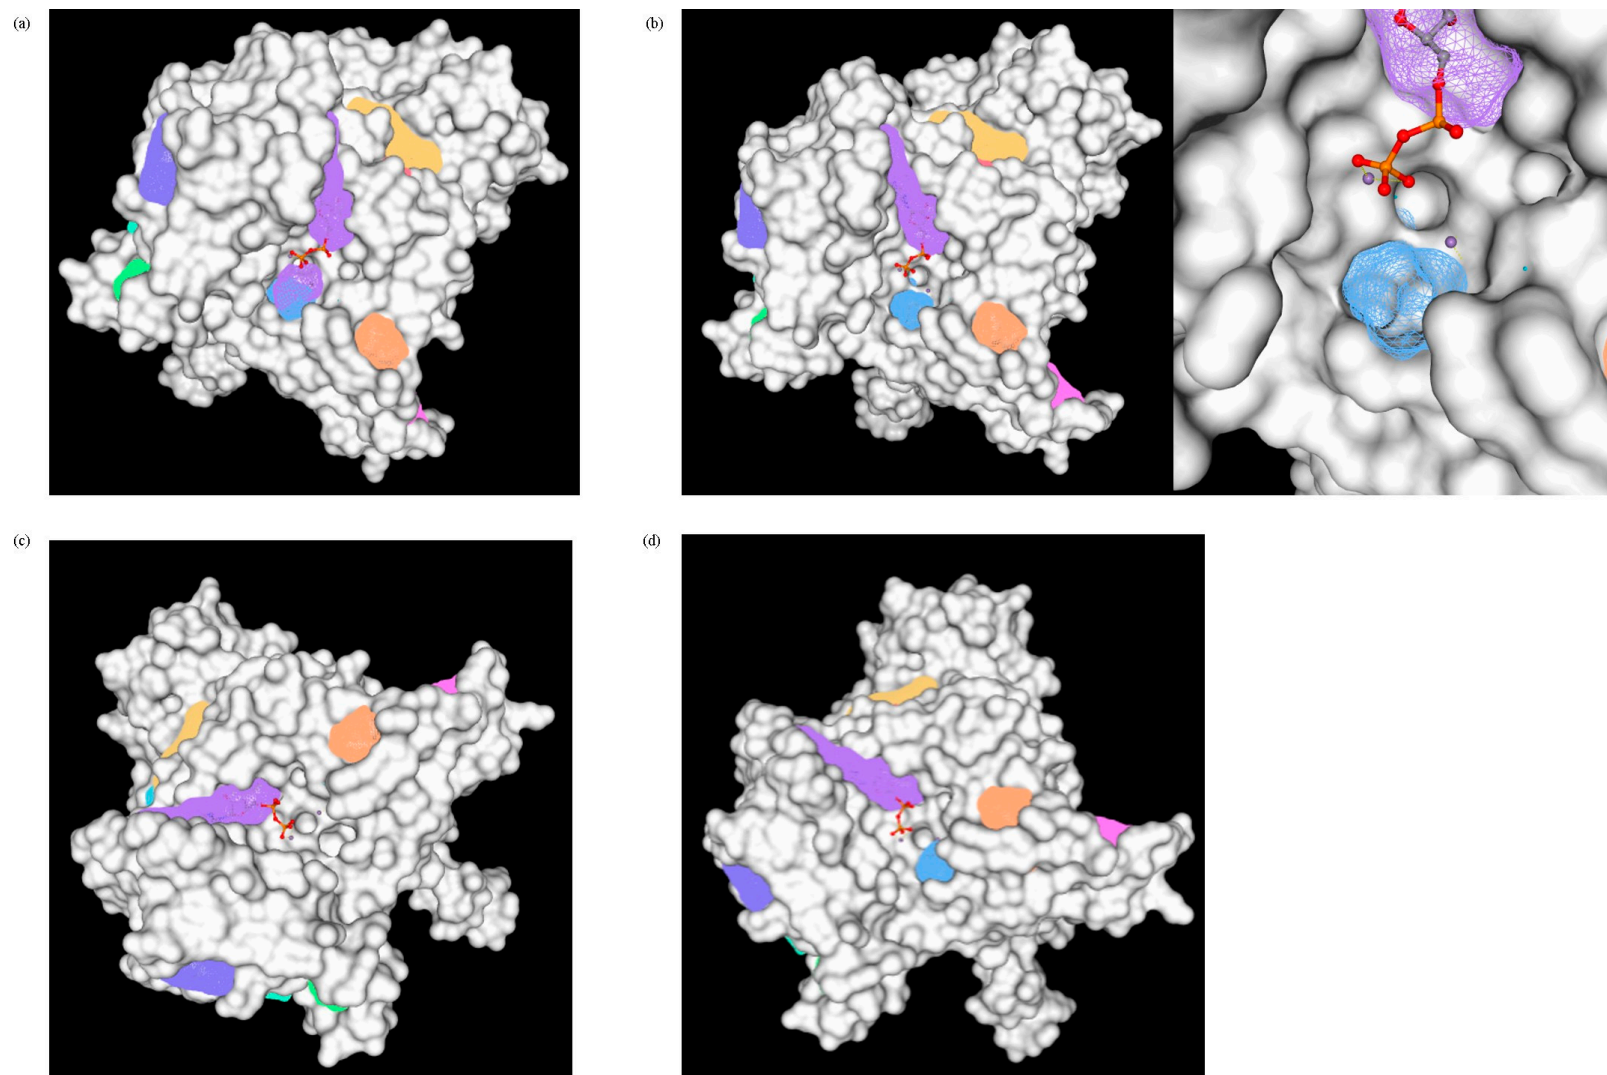

**Table S16.** Grid sizes used in Swissdock and energetic values of the most probable ligand-receptor complexes for phosphinothricin, methionine sulfoximine, glutamic acid and ampicillin

| Compound               | Conformations | Size of grid |        |        | Center   |         |          | Cluster | $\Delta G$<br>(kcal/mol) | FullFitness<br>(kcal/mol) | Ki                       |
|------------------------|---------------|--------------|--------|--------|----------|---------|----------|---------|--------------------------|---------------------------|--------------------------|
|                        |               | Width        | Length | Height | x        | y       | z        |         |                          |                           |                          |
| Glutamic acid          | 257           | 15.72        | 15.44  | 15.5   | -85.9047 | 13.5037 | -68.0569 | 2       | -8.6                     | -2188.8                   | $45.437 \times 10^{-8}$  |
| Phosphinothricin       | 257           | 14.06        | 15.63  | 15.00  | -90.9519 | 13.8641 | -82.4948 | 27      | -8.8                     | -2183.2                   | $31.6478 \times 10^{-8}$ |
| Methionine sulfoximine | 257           | 13.00        | 12.53  | 12.43  | -91.3579 | 12.8023 | -86.285  | 2       | -8.0                     | -2179.1                   | $13.575 \times 10^{-7}$  |
| Ampicillin             | 257           | 14.6         | 17.45  | 15.87  | -80.8418 | 4.5479  | -57.6088 | 2       | -9.3                     | -2028.4                   | $14.7347 \times 10^{-8}$ |

**Table S17.** Molecular docking results obtained using AutoDock Vina for phosphinothricin, methionine sulfoximine, glutamic acid and ampicillin.

**Table S17 (A).** Molecular docking results obtained using AutoDock Vina for phosphinothricin. Run time: 28.3 seconds.

| Mode | Affinity (kcal/mol) | Dist from RMSD L. B | Dist from RMSD U. B |
|------|---------------------|---------------------|---------------------|
| 1    | -1.1                | 0                   | 0                   |
| 2    | -1.1                | 6.947               | 6.947               |
| 3    | -1.0                | 15.171              | 15.171              |
| 4    | -0.9                | 12.825              | 12.825              |
| 5    | -0.9                | 19.823              | 19.823              |
| 6    | -0.9                | 13.155              | 13.155              |
| 7    | -0.8                | 16.552              | 16.552              |
| 8    | -0.8                | 16.683              | 16.683              |
| 9    | -0.8                | 16.589              | 16.589              |

**Table S17 (B).** Molecular docking results obtained using AutoDock Vina for methionine sulfoximine. Run time: 28.3 seconds.

| Mode | Affinity (kcal/mol) | Dist from RMSD L. B | Dist from RMSD U. B |
|------|---------------------|---------------------|---------------------|
| 1    | -6.3                | 0                   | 0                   |
| 2    | -5.7                | 1.607               | 4.178               |

| Mode | Affinity (kcal/mol) | Dist from RMSD L. B | Dist from RMSD U. B |
|------|---------------------|---------------------|---------------------|
| 3    | -5.6                | 1.371               | 1.576               |
| 4    | -5.3                | 1.835               | 4.564               |
| 5    | -4.9                | 4.021               | 6.687               |
| 6    | -4.9                | 2.205               | 2.9                 |
| 7    | -4.7                | 2.974               | 5.147               |
| 8    | -4.7                | 5.749               | 6.525               |
| 9    | -4.5                | 3.78                | 6.519               |

**Table S17 (C).** Molecular docking results obtained using AutoDock Vina for glutamic acid. Run time: 28.3 seconds.

| Mode | Affinity (kcal/mol) | Dist from RMSD L. B | Dist from RMSD U. B |
|------|---------------------|---------------------|---------------------|
| 1    | -1.1                | 0                   | 0                   |
| 2    | -1.0                | 9.244               | 9.244               |
| 3    | -0.9                | 7.399               | 7.399               |
| 4    | -0.9                | 11.768              | 11.768              |
| 5    | -0.9                | 7.325               | 7.325               |
| 6    | -0.9                | 14.969              | 14.969              |
| 7    | -0.8                | 14.634              | 14.634              |
| 8    | -0.8                | 12.111              | 12.111              |
| 9    | -0.8                | 10.39               | 10.39               |

**Table S17 (D).** Molecular docking results obtained using AutoDock Vina for ampicillin. Run time: 28.3 seconds.

| Mode | Affinity (kcal/mol) | Dist from RMSD L. B | Dist from RMSD U. B |
|------|---------------------|---------------------|---------------------|
| 1    | -7.3                | 0                   | 0                   |
| 2    | -7.1                | 2.509               | 6.605               |
| 3    | -6.7                | 1.462               | 2.226               |

| Mode | Affinity (kcal/mol) | Dist from RMSD L. B | Dist from RMSD U. B |
|------|---------------------|---------------------|---------------------|
| 4    | -6.4                | 2.628               | 6.805               |
| 5    | -6.4                | 2.462               | 6.322               |
| 6    | -6.3                | 2.01                | 6.305               |
| 7    | -6.3                | 3.51                | 6.753               |
| 8    | -6.1                | 3.221               | 6.501               |
| 9    | -6.0                | 4.104               | 6.77                |

**Table S18.** Grid sizes used in AutoDock Vina for phosphinothricin, methionine sulfoximine, glutamic acid and ampicillin.

| Compound               | Size of grid |        |        | Center  |          |          |
|------------------------|--------------|--------|--------|---------|----------|----------|
|                        | Width        | Length | Height | x       | y        | z        |
| Phosphinothricin       | 19.1024      | 18.23  | 17.529 | -4.1966 | -16.3175 | -71.1498 |
| Methionine sulfoximine | 13.43        | 15.59  | 19.19  | -5.8989 | -16.1835 | -66.3292 |
| Glutamic acid          | 25.56        | 19.33  | 12.445 | -2.7569 | -17.2695 | -68.7373 |
| Ampicillin             | 18.603       | 19.828 | 19.28  | -4.7314 | -17.317  | -69.2087 |

## REFERENCES

1. Systèmes, D. BIOVIA Draw for Academics (Version 21.1.0.2363). Available online: <https://discover.3ds.com/biovia-draw-academic> (accessed on 12 January 2023).
2. MarvinSketch (Version 5.0). Available online: <https://chemaxon.com/marvin> (accessed on 19 January 2023).
3. AquaSol: Predict Aqueous Solubility of Small Molecules Using UG-RNN Ensembles (Version 2.0). Available online: <http://cdb.ics.uci.edu/cgi-bin/tools/AquaSolWeb.py> (accessed on 21 January 2023).
4. Chemicalize - Instant Cheminformatics Solutions. Available online: <https://chemicalize.com> (accessed on 20 January 2023).
5. Jeliaskova, N.; Martinov, M.; Tcheremenskaia, O.; JK; Networks, M.; Rydberg, P.; Avramova, S.; Kochev, N.; Jeliaskov, V.; et al. ToxTree – ToxTree - Toxic Hazard Estimation by Decision Tree Approach (Version 3.1.0.1851). Available online: <https://toxtree.sourceforge.net/> (accessed on 26 January 2023).
6. Molecular Properties Prediction - Osiris Property Explorer. Available online: <https://www.organic-chemistry.org/prog/peo/> (accessed on 13 February 2023).
7. Drug Likeness Tool (DruLiTo 1) (Version 1.0.). Available online: [http://www.niper.gov.in/pi\\_dev\\_tools/DruLiToWeb/DruLiTo\\_index.html](http://www.niper.gov.in/pi_dev_tools/DruLiToWeb/DruLiTo_index.html) (accessed on 01 February 2023).
8. SMARTCyp (Version 3.0). Available online: [https://smartcyp.sund.ku.dk/mol\\_to\\_som](https://smartcyp.sund.ku.dk/mol_to_som) (accessed on 03 February 2023).
9. Calculation of Molecular Properties and Bioactivity Score. Available online: <https://www.molinspiration.com/cgi-bin/properties> (accessed on 05 February 2023).
10. SwissADME. Available online: <http://www.swissadme.ch/> (accessed on 17 January 2023).
11. Daina, A.; Michielin, O.; Zoete, V. SwissADME: A Free Web Tool to Evaluate Pharmacokinetics, Drug-Likeness and Medicinal Chemistry Friendliness of Small Molecules. *Sci Rep* **2017**, *7*, 42717, doi:10.1038/srep42717.
12. SwissTargetPrediction. Available online: <http://www.swisstargetprediction.ch/> (accessed on 08 February 2023).
13. SwissDock - The Online Docking Web Server of the Swiss Institute of Bioinformatics – TargetProteins. Available online: [http://www.swissdock.ch/target\\_proteins](http://www.swissdock.ch/target_proteins) (accessed on 11 February 2023).
14. Lagunin, A.A.; Dubovskaja, V.I.; Rudik, A.V.; Pogodin, P.V.; Druzhilovskiy, D.S.; Gloriovova, T.A.; Filimonov, D.A.; Sastry, N.G.; Poroikov, V.V. CLC-Pred: A Freely Available Web-Service for in Silico Prediction of Human Cell Line Cytotoxicity for Drug-like Compounds. *PLoS ONE* **2018**, *13*, e0191838, doi:10.1371/journal.pone.0191838.
15. Gusar – Create QSAR/QSPR Models on the Basis of the Appropriate Training Sets. Available online: <http://www.way2drug.com/gusar/acutoxpredict.html> (accessed on 29 January 2023).
16. Prediction of Site of Metabolism (Version 2.0). Available online: <http://www.way2drug.com/SOMP/> (accessed on 04 February 2023).
17. Way2Drug – Main (Version 2.0). Available online: <http://www.way2drug.com/PASSOnline/index.php> (accessed on 10 February 2023).
18. AutoDock Vina (Version 1.1.2). Available online: <https://vina.scripps.edu/> (accessed on 12 February 2023).
19. Download UCSF Chimera (Version 1.15). Available online: <https://www.cgl.ucsf.edu/chimera/download.html> (accessed on 12 February 2023).
20. PatchDock Server: An Automatic Server for Molecular Docking (Version Beta 1.3). Available online: <https://bioinfo3d.cs.tau.ac.il/PatchDock/php.php> (accessed on 11 February 2023).
21. Schneidman-Duhovny, D.; Inbar, Y.; Polak, V.; Shatsky, M.; Halperin, I.; Benyamini, H.; Barzilai, A.; Dror, O.; Haspel, N.; Nussinov, R.; et al. Taking Geometry to Its Edge: Fast Unbound Rigid (and Hinge-Bent) Docking. *Proteins* **2003**, *52*, 107–112, doi:10.1002/prot.10397.
22. SwissSimilarity. Available online: <http://www.swiss similarity.ch/> (accessed on 13 February 2023).
23. Delaney, J.S. ESOL: Estimating Aqueous Solubility Directly from Molecular Structure. *J. Chem. Inf. Comput. Sci.* **2004**, *44*, 1000–1005, doi:10.1021/ci034243x.
24. Ali, J.; Camilleri, P.; Brown, M.B.; Hutt, A.J.; Kirton, S.B. Revisiting the General Solubility Equation: In Silico Prediction of Aqueous Solubility Incorporating the Effect of Topographical Polar Surface Area. *J. Chem. Inf. Model.* **2012**, *52*, 420–428, doi:10.1021/ci200387c.
25. Arnott, J.A.; Planey, S.L. The Influence of Lipophilicity in Drug Discovery and Design. *Expert Opinion on Drug Discovery* **2012**, *7*, 863–875, doi:10.1517/17460441.2012.714363.
26. Mannhold, R.; Poda, G.I.; Ostermann, C.; Tetko, I.V. Calculation of Molecular Lipophilicity: State-of-the-Art and Comparison of LogP Methods on More than 96,000 Compounds. *Journal of Pharmaceutical Sciences* **2009**, *98*, 861–893, doi:10.1002/jps.21494.
27. Cheng, T.; Zhao, Y.; Li, X.; Lin, F.; Xu, Y.; Zhang, X.; Li, Y.; Wang, R.; Lai, L. Computation of Octanol–Water Partition Coefficients by Guiding an Additive Model with Knowledge. *J. Chem. Inf. Model.* **2007**, *47*, 2140–2148, doi:10.1021/ci700257y.

28. Wildman, S.A.; Crippen, G.M. Prediction of Physicochemical Parameters by Atomic Contributions. *J. Chem. Inf. Comput. Sci.* **1999**, *39*, 868–873, doi:10.1021/ci990307l.
29. Moriguchi, I.; Hirono, S.; Liu, Q.; Nakagome, I.; Matsushita, Y. Simple Method of Calculating Octanol/Water Partition Coefficient. *Chem. Pharm. Bull.* **1992**, *40*, 127–130, doi:10.1248/cpb.40.127.
30. Moriguchi, I.; Hirono, S.; Nakagome, I.; Hirano, H. Comparison of Reliability of Log P Values for Drugs Calculated by Several Methods. *Chem. Pharm. Bull.* **1994**, *42*, 976–978, doi:10.1248/cpb.42.976.
31. Pettersen, E.F.; Goddard, T.D.; Huang, C.C.; Couch, G.S.; Greenblatt, D.M.; Meng, E.C.; Ferrin, T.E. UCSF Chimera?A Visualization System for Exploratory Research and Analysis. *J. Comput. Chem.* **2004**, *25*, 1605–1612, doi:10.1002/jcc.20084.
32. Berman, H.M.; Battistuz, T.; Bhat, T.N.; Bluhm, W.F.; Bourne, P.E.; Burkhardt, K.; Feng, Z.; Gilliland, G.L.; Iype, L.; Jain, S.; et al. The Protein Data Bank. *Acta Crystallogr D Biol Crystallogr* **2002**, *58*, 899–907, doi:10.1107/S0907444902003451.
33. Meng, E.C.; Pettersen, E.F.; Couch, G.S.; Huang, C.C.; Ferrin, T.E. Tools for Integrated Sequence-Structure Analysis with UCSF Chimera. *BMC Bioinformatics* **2006**, *7*, 339, doi:10.1186/1471-2105-7-339.
34. Trott, O.; Olson, A.J. AutoDock Vina: Improving the Speed and Accuracy of Docking with a New Scoring Function, Efficient Optimization, and Multithreading. *J. Comput. Chem.* **2009**, NA-NA, doi:10.1002/jcc.21334.
35. PubChem. Available online: <https://pubchem.ncbi.nlm.nih.gov/> (accessed on 17 January 2023).
36. Patlewicz, G.; Jeliazkova, N.; Safford, R.J.; Worth, A.P.; Aleksiev, B. An Evaluation of the Implementation of the Cramer Classification Scheme in the Toxtree Software. *SAR and QSAR in Environmental Research* **2008**, *19*, 495–524, doi:10.1080/10629360802083871.
37. ProteinsPlus. Available online: <https://proteins.plus/> (accessed on 20 April 2023).
